# Supplementary material for: A distal vinyl shift (DVS) through quadruple domino reaction: synthesis of N-vinyl benzoheterocyclic scaffolds
Source: Royal Society of Chemistry journal article supplement (doi:10.1039/c8ra01478g), 2018-01-01

# A Distal Vinyl Shift through Quadruple Domino Reaction: Synthesis of *N*-vinyl Benzoheterocyclic Scaffolds

Manickam Bakthadoss,\* Mohammad Mushaf

*\*Department of Chemistry, Pondicherry University, Pondicherry-605 014, India*

*E-mail: bhakthadoss@yahoo.com*

## Supplementary Information

### Table of Contents

|                                                                                                        |    |
|--------------------------------------------------------------------------------------------------------|----|
| 1. General Consideration.....                                                                          | 2  |
| 2. Typical experimental procedure for the synthesis of compounds 1 and 6.....                          | 2  |
| 3. Typical experimental procedure for the synthesis of compounds (3a-s) and (5a-e).....                | 3  |
| 4. Typical experimental procedure for the synthesis of compounds (7a-b).....                           | 3  |
| 5. Analytical Data of the Products.....                                                                | 3  |
| 6. X-ray Analysis of compound 3d & 5a .....                                                            | 14 |
| 7. <sup>1</sup> H, <sup>13</sup> C NMR & ESI-HRMS spectra for the compounds (3a-s, 5a-e and 7a-b)..... | 17 |

## General Consideration:

Commercial reagents were used without further purification. IR spectra were recorded on a Perkin Elmer-FTIR spectrometer using solid samples as KBr plates. For compounds  $^1\text{H}$  NMR (400 MHz,  $\text{CDCl}_3$ ) and  $^{13}\text{C}$  NMR (100 MHz,  $\text{CDCl}_3$ ) spectra were recorded in deuteriochloroform with one drop of  $\text{DMSO-d}_6$  (some compounds were recorded in pure  $\text{DMSO-d}_6$ ) on a Bruker 400 MHz spectrometer using tetramethylsilane (TMS,  $\delta = 0$ ) as an internal standard at room temperature. Mass spectra were recorded on Agilent 1200 LC/MS-6110 mass spectrometer. Aldehydes, propiolates and aminophenols were purchased from Sigma Aldrich. Compounds spectral data and copy of  $^1\text{H}$ ,  $^{13}\text{C}$  NMR and ESI-HRMS spectra of all compounds **3a-s**, **5a-e** and **7a-b** are listed below (pages 17-95).

### Preparation of vinylogous carbonates (**1**)<sup>1</sup>

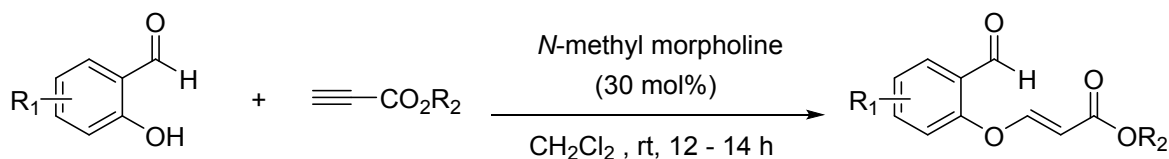

To a solution of salicylaldehyde (1 equiv) in dichloromethane was added  $N$ -methyl morpholine (30 mol %) and the mixture stirred at room temperature for 10 minutes. Alkyl propiolates (1.1 equiv) were added and the reaction kept for stirring for 12-14h. The progress of the reaction was monitored by TLC. DCM was removed using rotary evaporator and the mixture was quenched by addition of water and 5% dilute HCl. The aqueous layer was extracted with ethyl acetate. The organic layer was washed with brine, dried over  $\text{Na}_2\text{SO}_4$ , filtrated, and concentrated under reduced pressure to give the crude product. The crude product was purified by silica gel column chromatography (60-120 mesh) [ethyl acetate / hexanes (0.5:9.5)] to give the final compound.

## References

- (a) V. Srinivas, M. Koketsu. *J. Org. Chem.* 2013, **78**, 11612-11617.  
(b) L.-Q. Lu, F. Li, J. An, J.-J. Zhang, X.-L. An, Q.-L. Hua, W.-J. Xiao, *Angew. Chem., Int. Ed.* 2009, **48**, 9542.

### Typical experimental procedure for the synthesis of compounds (3a-s) and (5a-e)

A mixture of methyl (*E*)-3-(2-formylphenoxy)acrylate (**1**, 1mmol), and 2-aminophenol or 2-aminothiophenol or 2-aminobenzylalcohol (**2** or **4**, 1 mmol) in acetonitrile (10 mL) was placed in a round bottom flask and stirred at room temperature for 2-4 h. The reaction was monitored by the TLC. After the completion of the reaction (based on the disappearance of the starting material), the reaction was stopped and the precipitate was filtered and washed with ethylacetate : hexanes (0.5 : 9.5) to afford **3** or **5** as the final compound.

### Typical experimental procedure for the synthesis of compounds (7a-b)

A mixture of dimethyl 2-((*N*-(2-formylphenyl)-4-methylphenyl)sulfonamido)fumarate (**6**, 1mmol), and 2-aminophenol (**2**, 1 mmol) in acetonitrile (10 mL) was placed in a round bottom flask and stirred at room temperature for 8h. The reaction was monitored by the TLC. After the completion of the reaction (based on the disappearance of the starting material), the reaction was stopped and the precipitate was filtered and washed with ethylacetate : hexanes (0.5 : 9.5) to afford the final compound.

## Analytical Data of the Products

### Methyl (*E*)-3-(2-(2-hydroxyphenyl)benzo[d]oxazol-3(2H)-yl)acrylate (**3a**)

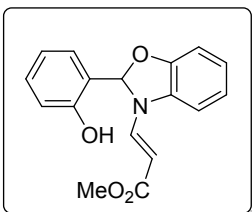

Yield : 80%; white solid; M.P. = 181-182 °C; Reaction time: 3 h; <sup>1</sup>H NMR (400 MHz, CDCl<sub>3</sub>) : δ 3.72 (s, 3H), 4.92 (d, *J* = 13.6 Hz, 1H), 6.86 – 7.55 (m, 8H), 7.97 (d, *J* = 13.6 Hz, 1H), 9.73 (s, 1H) <sup>13</sup>C NMR (100 MHz, CDCl<sub>3</sub>) : δ 50.51, 90.67, 92.09, 107.38, 108.70, 115.94, 119.40, 120.88, 120.98, 122.67, 126.67, 130.91, 131.89, 137.78, 149.78, 155.17, 168.12; IR (KBr) : 1635, 1660, 3202, 3482; HRMS calculated for C<sub>17</sub>H<sub>15</sub>NO<sub>4</sub> [M+H]<sup>+</sup> 298.1077, found 298.1068.

**Methyl (*E*)-3-(5-chloro-2-(2-hydroxyphenyl)benzo[d]oxazol-3(2H)-yl)acrylate (3b)**

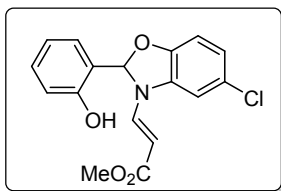

Yield : 78%; white solid; M.P. = 202-203 °C; Reaction time: 2 h; <sup>1</sup>H NMR (400 MHz, CDCl<sub>3</sub>) : δ 3.55 (s, 3H), 4.66 (d, *J* = 13.6 Hz, 1H), 6.80 – 7.48 (m, 8H), 7.92 (d, *J* = 13.6Hz, 1H), 10.29 (s, 1H); <sup>13</sup>C NMR (100 MHz, CDCl<sub>3</sub>) : δ 50.86, 92.33, 93.25, 108.96, 109.50, 116.25, 119.72, 120.93, 122.22, 125.42, 127.76, 131.81, 133.85, 138.27, 148.97, 155.78, 167.34 ; IR (KBr) : 1655, 1680, 3226, 3418 cm<sup>-1</sup>; HRMS calculated for C<sub>17</sub>H<sub>14</sub>ClNO<sub>4</sub> [M+H]<sup>+</sup> 332.0687, found 332.0683.

**Methyl(*E*)-3-(2-(2-hydroxyphenyl)-5-methylbenzo[d]oxazol-3(2H)-yl)acrylate (3c)**

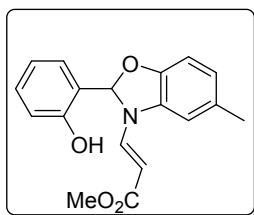

Yield : 85%; white solid; M.P. = 202-203 °C; Reaction time: 4 h; <sup>1</sup>H NMR (400 MHz, CDCl<sub>3</sub>) : δ 2.33 (s, 3H), 3.63 (s, 3H), 4.79 (d, *J* = 16 Hz, 1H), 6.63-7.20 (m, 8H), 7.83 (d, *J* = 12Hz, 1H), 9.72 (s, 1H); <sup>13</sup>C NMR (75 MHz, CDCl<sub>3</sub>) : δ 20.57, 50.18, 90.33, 91.57, 95.41, 107.91, 107.98, 115.60, 119.06, 120.73, 122.48, 126.30, 130.34, 130.55, 131.49, 137.39, 147.44, 154.87, 167.69; IR (KBr) : 1632, 1667, 3231, 3455 cm<sup>-1</sup>; HRMS calculated for C<sub>18</sub>H<sub>17</sub>NO<sub>4</sub> [M+H]<sup>+</sup> 312.1234, found 312.1235

**Methyl(*E*)-3-(2-(5-bromo-2-hydroxyphenyl)-5-methylbenzo[d]oxazol-3(2H)-yl)acrylate (3d)**

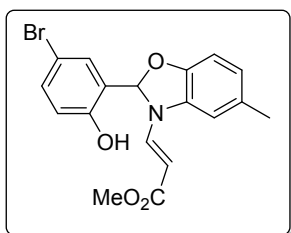

Yield : 88%; white solid; M.P. = 202-203 °C; Reaction time: 3 h; <sup>1</sup>H NMR (400 MHz, CDCl<sub>3</sub>) : δ 2.27 (s, 3H), 3.54 (s, 3H), 4.67 (d, *J* = 13.2 Hz, 1H), 6.66 (s, 2H), 6.87 (d, *J* = 8.4Hz, 1H), 7.02 (s, 2H), 7.12 (s, 1H), 7.31 (d, *J* = 7.6Hz, 1H), 7.81 (d, *J* = 13.6Hz, 1H), 10.46 (s, 1H) ; <sup>13</sup>C NMR



(100 MHz, CDCl<sub>3</sub>) :  $\delta$  20.70, 50.35, 78.30, 78.96, 89.71, 91.87, 108.12, 108.95, 110.38, 118.13, 122.89, 123.44, 129.03, 130.76, 131.49, 133.62, 137.76, 147.36, 154.68, 167.12; IR (KBr) : 1628, 1661, 3227, 3443 cm<sup>-1</sup>; HRMS calculated for C<sub>18</sub>H<sub>16</sub>BrNO<sub>4</sub> [M+H]<sup>+</sup> 390.0329, found 390.0327.

**Methyl (E)-3-(2-(5-bromo-2-hydroxyphenyl)-5-chlorobenzo[d]oxazol-3(2H)-yl)acrylate (3e)**

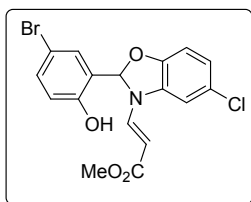

Yield : 83%; white solid; M. P : 201-202 °C; Reaction time : 2.5 h; <sup>1</sup>H NMR (400 MHz, CDCl<sub>3</sub>) :  $\delta$  3.55 (s, 3H), 4.73 (d, *J* = 13.6Hz, 1H), 6.64 – 7.74 (m, 7H), 7.78 (d, *J* = 13.6Hz, 1H), 10.28 (s, 1H) ; <sup>13</sup>C NMR (100 MHz, CDCl<sub>3</sub>) :  $\delta$  50.46, 90.77, 93.56, 108.16, 109.06, 110.61, 117.95, 121.88, 122.69, 125.71, 129.10, 133.02, 133.68, 137.22, 148.27, 154.56, 167.05; IR (KBr) : 1631, 1670, 3181, 3467 cm<sup>-1</sup>; HRMS calculated for C<sub>17</sub>H<sub>13</sub>BrClNO<sub>4</sub> [M+H]<sup>+</sup> 409.9792, found 409.9789

**Ethyl (E)-3-(2-(5-bromo-2-hydroxyphenyl)-5-methylbenzo[d]oxazol-3(2H)-yl)acrylate (3f)**

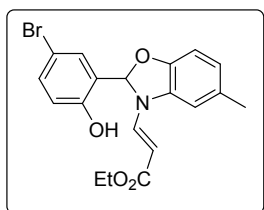

Yield : 90%; white solid; M. P : 190-191°C; Reaction time : 3 h; <sup>1</sup>H NMR (400 MHz, CDCl<sub>3</sub>) :  $\delta$  1.14 (d, *J* = 6.8Hz, 3H), 2.26 (s, 3H), 4.00 (q, *J* = 4Hz, 2H), 4.64 (d, *J* = 13.6Hz, 1H), 6.71 – 7.43 (m, 7H), 7.86 (d, *J* = 13.6Hz, 1H), 10.62 (s, 1H) ; <sup>13</sup>C NMR (100 MHz, CDCl<sub>3</sub>) :  $\delta$  14.44, 20.79, 59.08, 90.11, 92.14, 108.34, 109.48, 110.36, 118.53, 123.14, 123.71, 129.35, 131.00, 131.71, 134.07, 138.12, 147.50, 155.05, 166.90; IR (KBr) : 1587, 1642, 2991, 3484cm<sup>-1</sup>; HRMS calculated for C<sub>19</sub>H<sub>18</sub>BrNO<sub>4</sub> [M+H]<sup>+</sup> 404.0495, found 404.0493

**Ethyl (*E*)-3-(2-(5-bromo-2-hydroxyphenyl)-5-chlorobenzo[d]oxazol-3(2H)-yl)acrylate (3g)**

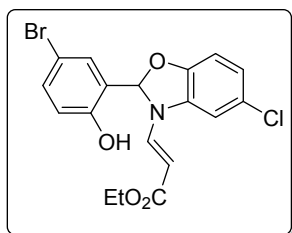

Yield : 86%; white solid; M. P : 189-190°C; Reaction time : 2 h;  $^1\text{H NMR}$  (400 MHz,  $\text{CDCl}_3$ ) :  $\delta$  1.16 (t,  $J = 6.8$  Hz, 3H), 4.00 (q,  $J = 1.8$ Hz, 2H), 4.68 (d,  $J=13.6$  Hz, 1H), 6.71-7.33 (m, 7H), 7.83 (d,  $J = 13.6$ Hz, 1H), 10.47 (s, 1H);  $^{13}\text{C NMR}$  (75 MHz,  $\text{CDCl}_3$ ) :  $\delta$  14.19, 58.99, 90.93, 93.79, 108.58, 109.12, 110.42, 118.16, 121.88, 122.93, 125.57, 129.28, 133.27, 133.83, 137.58, 148.34, 154.79, 166.50; IR (KBr) : 1603, 1634, 2987, 3411 $\text{cm}^{-1}$ ; HRMS calculated for  $\text{C}_{18}\text{H}_{15}\text{BrClNO}_4$   $[\text{M}+\text{H}]^+$  423.9949, found 423.9946.

**Ethyl (*E*)-3-(2-(5-bromo-2-hydroxyphenyl)-5-nitrobenzo[d]oxazol-3(2H)-yl)acrylate (3h)**

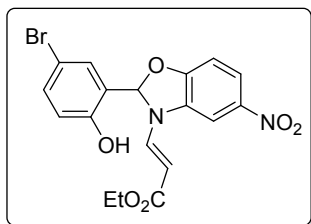

Yield : 84%; Pale yellow solid; M. P : 155-156°C; Reaction time : 4 h;  $^1\text{H NMR}$  (400 MHz,  $\text{CDCl}_3$ ) :  $\delta$  1.29 (t,  $J=7.2$  Hz, 3H), 4.22 (q,  $J = 7.2$ Hz, 2H), 5.70 (d,  $J=12.4$  Hz, 1H), 7.06-8.32 (m, 8H), 9.01 (s, 1H);  $^{13}\text{C NMR}$  (100 MHz,  $\text{CDCl}_3$ ) :  $\delta$  14.41, 60.71, 105.14, 112.53, 115.60, 118.75, 120.12, 125.49, 127.30, 130.94, 135.12, 136.87, 141.41, 153.15, 155.13, 157.54, 158.09, 166.50; IR (KBr) : 1596, 1698, 2831, 3437 $\text{cm}^{-1}$ ; HRMS calculated for  $\text{C}_{18}\text{H}_{15}\text{BrN}_2\text{O}_6$   $[\text{M}+\text{H}]^+$  435.0189, found 435.0179.

**Methyl (*E*)-3-(2-(5-chloro-2-hydroxyphenyl)-5 methylbenzo[d]oxazol-3(2H)-yl)acrylate (3i)**

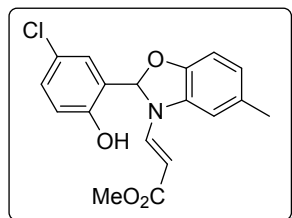

Yield : 80%; white solid; M. P : 204-205°C; Reaction time : 3 h;  $^1\text{H}$  NMR (400 MHz,  $\text{CDCl}_3$ ) :  $\delta$  2.27 (s, 3H), 3.55 (s, 3H), 4.65 (d,  $J = 12\text{Hz}$ , 1H) 6.69-7.32 (m, 7H), 7.87 (d,  $J = 12\text{Hz}$ , 1H), 10.59 (s, 1H);  $^{13}\text{C}$  NMR (100 MHz,  $\text{CDCl}_3$ ) :  $\delta$  20.76, 50.65, 90.16, 91.80, 108.32, 109.51, 118.02, 122.89, 123.13, 126.53, 130.98, 131.18, 131.66, 138.15, 147.52, 154.60, 167.25; IR (KBr) : 1611, 1663, 3228, 3443 $\text{cm}^{-1}$ ; HRMS calculated for  $\text{C}_{18}\text{H}_{16}\text{ClNO}_4$   $[\text{M}+\text{H}]^+$  346.0844, found 346.0843.

**Methyl (E)-3-(5-chloro-2-(5-chloro-2-hydroxyphenyl)benzo[d]oxazol-3(2H)-yl)acrylate (3j)**

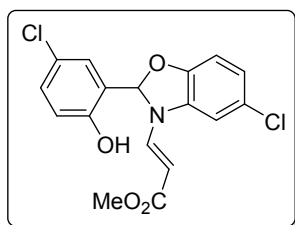

Yield : 75%; white solid; M. P : 201-202°C; Reaction time : 2 h;  $^1\text{H}$  NMR (400 MHz,  $\text{CDCl}_3$ ) :  $\delta$  3.55 (s, 3H), 4.67 (d,  $J = 13.6\text{Hz}$ , 1H), 6.83 – 7.53 (m, 7H), 7.95 (d,  $J = 13.6\text{Hz}$ , 1H), 10.58 (s, 1H);  $^{13}\text{C}$  NMR (100 MHz,  $\text{CDCl}_3$ ) :  $\delta$  49.16, 89.54, 92.27, 106.86, 107.77, 116.19, 120.59, 120.86, 122.16, 124.42, 124.90, 129.51, 131.73, 135.92, 146.98, 152.77, 165.78; IR (KBr) : 1601, 1665, 2831, 3427 $\text{cm}^{-1}$ ; HRMS calculated for  $\text{C}_{17}\text{H}_{13}\text{Cl}_2\text{NO}_4$   $[\text{M}+\text{H}]^+$  366.0298, found 366.0299.

**Methyl (E)-3-(2-(5-chloro-2-hydroxyphenyl)-5-nitrobenzo[d]oxazol-3(2H)-yl)acrylate (3k)**

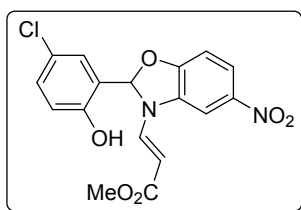

Yield : 73%; Pale yellow solid; M. P : 155-156°C; Reaction time : 3.5 h;  $^1\text{H}$  NMR (400 MHz,  $\text{CDCl}_3$ ) :  $\delta$  3.59 (s, 3H), 4.83 (d,  $J = 13.6\text{Hz}$ , 1H), 6.77 – 7.82 (m, 7H), 10.08 (s, 1H);  $^{13}\text{C}$  NMR (100 MHz,  $\text{CDCl}_3$ ) :  $\delta$  50.54, 92.42, 95.07, 102.52, 107.58, 117.38, 119.97, 121.01, 123.66, 126.16, 131.07, 133.03, 136.46, 142.07, 144.04, 153.97, 154.66, 166.86; IR (KBr) : 1651, 1697, 3073, 3425  $\text{cm}^{-1}$ ; HRMS calculated for  $\text{C}_{17}\text{H}_{13}\text{ClN}_2\text{O}_6$   $[\text{M}+\text{H}]^+$  377.0538, found 377.0525.

**Ethyl (*E*)-3-(2-(5-chloro-2-hydroxyphenyl)-5-methylbenzo[d]oxazol-3(2H)-yl)acrylate (3l)**

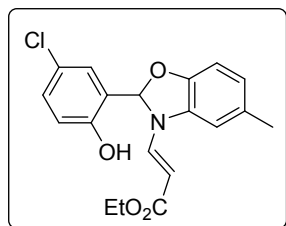

Yield : 89%; white solid; M. P : 186-187°C; Reaction time : 4 h;  $^1\text{H NMR}$  (400 MHz,  $\text{CDCl}_3$ ) :  $\delta$  1.14 (t,  $J = 8\text{Hz}$ , 3H), 2.27 (s, 3H), 4.01 (q,  $J = 7.2\text{Hz}$ , 2H), 4.63 (d,  $J = 12\text{Hz}$ , 1H), 6.71 – 7.32 (m, 7H), 7.86 (d,  $J = 12\text{Hz}$ , 1H), 10.59 (s, 1H) ;  $^{13}\text{C NMR}$  (100 MHz,  $\text{CDCl}_3$ ) :  $\delta$  14.45, 20.79, 59.08, 90.17, 92.11, 108.35, 109.50, 118.05, 122.91, 123.17, 126.52, 131.00, 131.21, 131.71, 138.12, 147.50, 154.62, 166.90; IR (KBr) : 1620, 1670, 3181, 3448 $\text{cm}^{-1}$ ; HRMS calculated for  $\text{C}_{19}\text{H}_{18}\text{ClNO}_4$  [ $\text{M}+\text{H}$ ] $^+$  360.1000, found 360.0997.

**Methyl (*E*)-3-(2-(3-ethoxy-2-hydroxyphenyl)-5-methylbenzo[d]oxazol-3(2H)-yl)acrylate (3m)**

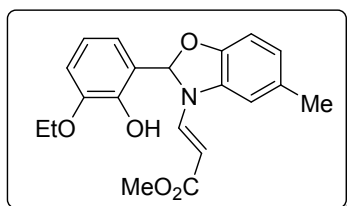

Yield : 84%; M. P : 159-160°C; Reaction time : 4 h;  $^1\text{H NMR}$  (400 MHz,  $\text{CDCl}_3$ ) :  $\delta$  1.45 (t,  $J=7.2\text{Hz}$ , 3H), 2.33 (s, 3H), 3.66 (s, 3H), 4.11 (q,  $J = 6.8\text{Hz}$ , 2H), 4.80 (d,  $J=13.6\text{ Hz}$ , 1H), 6.09 (s, 1H), 6.66 – 6.88 ( m, 6H), 7.12 (s, 1H), 7.86 (d,  $J = 13.6$ , 1H) ;  $^{13}\text{C NMR}$  (75 MHz,  $\text{CDCl}_3$ ) :  $\delta$  14.98, 21.36, 51.13, 64.91, 91.13, 92.58, 108.84, 112.94, 118.80, 120.39, 120.88, 123.31, 131.35, 132.25, 138.27, 144.22, 146.13, 148.26, 168.75; IR (KBr) : 1620, 3031, 3243, 3434 $\text{cm}^{-1}$ ; HRMS calculated for  $\text{C}_{25}\text{H}_{22}\text{N}_3\text{O}_2$  [ $\text{M}+\text{H}$ ] $^+$  356.1496, found 356.1496.

**Methyl (*E*)-3-(5-chloro-2-(5-chloro-2-hydroxyphenyl)benzo[d]oxazol-3(2H)-yl)acrylate (3n)**

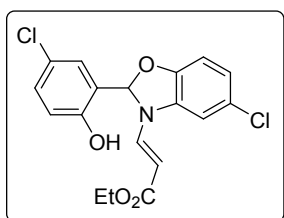

Yield : 80%; white solid; M. P : 171-172°C; Reaction time : 2 h;  $^1\text{H}$  NMR (400 MHz,  $\text{CDCl}_3$ ) :  $\delta$  1.14 (t,  $J = 7.2\text{Hz}$ , 3H), 4.02 (q,  $J = 7.2\text{Hz}$ , 2H), 4.65 (d,  $J = 13.6\text{Hz}$ , 1H), 6.82 – 7.52 (m, 7H), 7.93 (d,  $J = 13.6\text{Hz}$ , 1H), 10.60 (s, 1H) ;  $^{13}\text{C}$  NMR (100 MHz,  $\text{CDCl}_3$ ) :  $\delta$  14.41, 59.19, 91.48, 93.62, 109.15, 109.43, 118.07, 122.12, 122.67, 122.93, 125.42, 127.00, 131.43, 133.60, 138.19, 148.62, 154.76, 166.63 ; IR (KBr) : 1631, 1676, 2990,  $3456\text{cm}^{-1}$  ; HRMS calculated for  $\text{C}_{18}\text{H}_{15}\text{Cl}_2\text{NO}_4$   $[\text{M}+\text{H}]^+$  380.0454, found 380.0455.

**Methyl (*E*)-3-(2-(5-bromo-2-hydroxyphenyl)benzo[d]oxazol-3(2H)-yl)acrylate (3o)**

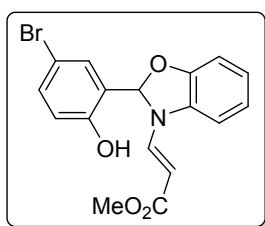

Yield : 86%; white solid; M. P : 188-189°C; Reaction time: 3 h;  $^1\text{H}$  NMR (400 MHz,  $\text{CDCl}_3$ ) :  $\delta$  3.64 (s, 3H), 4.79 (d,  $J = 13.6\text{ Hz}$ , 1H), 6.78 – 7.72 (m, 8H), 7.86 (d,  $J = 13.6\text{Hz}$ , 1H), 10.21 (s, 1H) ;  $^{13}\text{C}$  NMR (100 MHz,  $\text{CDCl}_3$ ) :  $\delta$  50.75, 89.96, 92.66, 107.71, 109.02, 111.27, 118.03, 121.36, 122.99, 123.14, 129.28, 131.79, 133.75, 137.90, 149.64, 154.58, 168.12 ; IR (KBr) : 1600, 1656, 2946,  $3437\text{ cm}^{-1}$ ; HRMS calculated for  $\text{C}_{17}\text{H}_{14}\text{BrNO}_4$   $[\text{M}+\text{H}]^+$  376.0182, found 376.0171.

**(Ethyl (*E*)-3-(2-(5-bromo-2-hydroxyphenyl)benzo[d]oxazol-3(2H)-yl)acrylate (3p)**

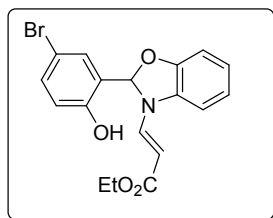

Yield : 88%; white solid; M. P : 170-171 °C; Reaction time : 4 h;  $^1\text{H}$  NMR (400 MHz,  $\text{CDCl}_3$ ) :  $\delta$  1.23 (t,  $J = 7.2\text{Hz}$ , 3H), 4.09 (q,  $J = 6.8\text{Hz}$ , 2H), 4.79 (d,  $J = 13.6\text{Hz}$ , 1H), 6.78 – 7.54 (m, 6H), 7.86 (d,  $J = 13.6\text{Hz}$ , 1H), 10.05 (s, 1H);  $^{13}\text{C}$  NMR (75 MHz,  $\text{CDCl}_3$ ) :  $\delta$  13.93, 58.99, 89.59, 92.68, 107.40, 108.59, 110.76, 117.73, 121.03, 122.59, 122.89, 128.84, 131.47, 133.36, 137.43,

149.21, 154.32, 167.24; IR (KBr) : 1621, 1667, 3179, 3433 $\text{cm}^{-1}$ , HRMS calculated for  $\text{C}_{18}\text{H}_{16}\text{BrNO}_4$   $[\text{M}+\text{H}]^+$  390.0339, found 390.0338.

**Methyl (*E*)-3-(2-(5-chloro-2-hydroxyphenyl)benzo[d]oxazol-3(2H)-yl)acrylate (3q)**

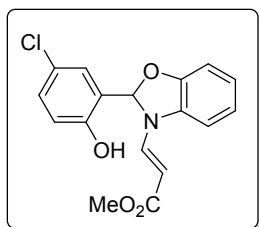

Yield : 79%; white solid; M. P : 191-192 $^{\circ}\text{C}$ ; Reaction time : 3 h;  $^1\text{H}$  NMR (400 MHz,  $\text{CDCl}_3$ ) :  $\delta$  3.55 (s, 3H), 4.66 (d,  $J = 13.6\text{Hz}$ , 1H), 6.85-7.36 (m, 8H), 7.91 (d,  $J = 13.6\text{Hz}$ , 1H), 10.59 (s, 1H);  $^{13}\text{C}$  NMR (100 MHz,  $\text{CDCl}_3$ ) :  $\delta$  50.38, 89.62, 92.25, 107.49, 108.62, 117.33, 121.14, 122.43, 122.71, 123.62, 126.02, 130.54, 131.45, 137.52, 149.31, 153.90, 167.60; IR (KBr) : 1600, 1665, 3224, 3452  $\text{cm}^{-1}$ ; HRMS calculated for  $\text{C}_{17}\text{H}_{14}\text{ClNO}_4$   $[\text{M}+\text{H}]^+$  332.0687, found 332.0684.

**Ethyl (*E*)-3-(2-(5-bromo-2-hydroxyphenyl)benzo[d]thiazol-3(2H)-yl)acrylate (3r)**

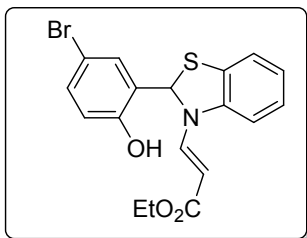

Yield : 65 %; M. P : 161-162 $^{\circ}\text{C}$ ; Reaction time : 4 h;  $^1\text{H}$  NMR (400 MHz,  $\text{CDCl}_3$ ) :  $\delta$  1.29 (t,  $J = 6.8\text{Hz}$ , 3H), 4.20 (q,  $J = 7.2\text{ Hz}$ , 2H), 5.80 (d,  $J = 12.4\text{ Hz}$ , 1H); 7.08 – 8.12 (m, 7H), 8.69 (s, 1H);  $^{13}\text{C}$  NMR (100 MHz,  $\text{CDCl}_3$ ) :  $\delta$  14.41, 60.60, 104.73, 118.82, 120.31, 121.56, 123.53, 125.76, 126.64, 132.69, 134.65, 136.23, 152.22, 152.41, 157.48, 160.02, 166.59; IR (KBr) : 1650, 1693, 2832, 3425  $\text{cm}^{-1}$ ; HRMS calculated for  $\text{C}_{18}\text{H}_{16}\text{BrNO}_3\text{S}$   $[\text{M}-\text{H}]^+$  403.9958, found 403.9954.

**Ethyl (*E*)-3-(2-(5-bromo-2-hydroxyphenyl)benzo[*d*]thiazol-3(*2H*)-yl)acrylate (3s)**

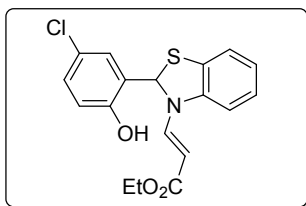

Yield : 68 %; M. P : 163-164°C; Reaction time : 4 h; <sup>1</sup>H NMR (400 MHz, CDCl<sub>3</sub>) : δ 1.29 (t, *J* = 8 Hz, 3H), 4.19 (q, *J* = 4Hz, 2H), 5.80 (d, *J* = 12Hz, 1H), 7.15-8.55 (m, 7H), 8.56 (s, 1H); <sup>13</sup>C NMR (75 MHz, CDCl<sub>3</sub>) : δ 14.42, 60.60, 104.62, 120.09, 121.58, 123.53, 125.77, 126.03, 126.65, 129.77, 131.39, 131.73, 136.23, 151.89, 152.23, 157.66, 160.16, 166.63 ; IR (KBr) : 1615, 1680, 2945, 3437 cm<sup>-1</sup>; HRMS calculated for C<sub>18</sub>H<sub>16</sub>NO<sub>3</sub>S [M-H]<sup>+</sup> 360.0463, found 360.0459.

**Ethyl (*E*)-3-(2-(2-hydroxyphenyl)-2H-benzo[*d*][1,3]oxazin-1(*4H*)-yl)acrylate (5a)**

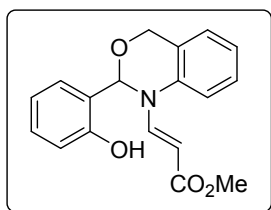

Yield : 92%; M. P : 202-203°C; Reaction time : 6 h; <sup>1</sup>H NMR (400 MHz, CDCl<sub>3</sub>) : δ 3.53 (s, 3H), 4.58 (d, *J* = 14Hz, 1H), 4.68 (dd, *J* = 14Hz, 8.8Hz, 2H), 6.63 (s, 1H), 6.71-7.40 (m, 8H), 7.93 (d, *J* = 14Hz, 1H), 10.04 (s, 1H); <sup>13</sup>C NMR (100 MHz, CDCl<sub>3</sub>) : δ 50.50, 62.31, 81.49, 92.18, 114.25, 116.07, 118.82, 120.84, 122.02, 124.27, 124.84, 127.00, 128.21, 130.13, 137.53, 141.62, 155.32, 168.52; IR (KBr) : 1605, 1663, 3179, 3433cm<sup>-1</sup>; HRMS calculated for C<sub>18</sub>H<sub>17</sub>NO<sub>4</sub> [M+H]<sup>+</sup> 312.1234, found 312.1214.

**Methyl (*E*)-3-(2-(5-bromo-2-hydroxyphenyl)-2H-benzo[*d*][1,3]oxazin-1(*4H*)-yl)acrylate (5b)**

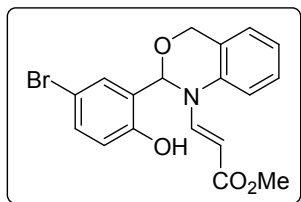

Yield : 85%; M. P : 204-205°C; Reaction time : 6 h;  $^1\text{H}$  NMR (400 MHz,  $\text{CDCl}_3$ ) :  $\delta$  3.65 (s, 3H), 4.65 (s, 2H), 4.83 (d,  $J = 13.6\text{Hz}$ , 1H), 6.49 (s, 1H), 6.88 – 7.56 (m, 7H), 8.06 (d,  $J = 13.6\text{Hz}$ , 1H), 9.80 (s, 1H) ;  $^{13}\text{C}$  NMR (100 MHz,  $\text{CDCl}_3$ ) :  $\delta$  50.34, 62.70, 80.92, 92.18, 110.33, 114.47, 117.77, 122.12, 123.43, 124.55, 124.75, 128.29, 129.24, 132.61, 137.32, 141.50, 154.49, 168.10 ; IR (KBr) : 1610, 1673, 3231, 3444  $\text{cm}^{-1}$ ; HRMS calculated for  $\text{C}_{18}\text{H}_{16}\text{BrNO}_4$   $[\text{M}+\text{H}]^+$  390.0339, found 390.0320.

**Ethyl (*E*)-3-(2-(5-bromo-2-hydroxyphenyl)-2H-benzo[*d*][1,3]oxazin-1(4*H*)-yl)acrylate (5c)**

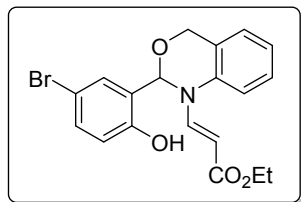

Yield : 90%; M. P : 200-201°C; Reaction time : 5 h;  $^1\text{H}$  NMR (400 MHz,  $\text{CDCl}_3$ ) :  $\delta$  1.27 (t,  $J = 7.2$  Hz, 3H), 4.18 (q,  $J = 7.2$  Hz, 2H), 4.70 (dd, 14.8Hz, 14.4Hz, 2H), 5.03 (d,  $J = 13.6$  Hz, 1H), 6.47 (s, 1H), 6.83-7.35 (m, 7H), 8.15 (d,  $J = 13.6\text{Hz}$ , 1H);  $^{13}\text{C}$  NMR (100 MHz,  $\text{CDCl}_3$ ) :  $\delta$  13.99, 58.97, 62.64, 80.98, 92.66, 110.41, 114.50, 117.84, 122.11, 123.44, 124.44, 124.77, 128.29, 129.33, 132.65, 137.35, 141.45, 154.55, 167.79 ; IR (KBr) : 1606, 1668, 3240, 3432 $\text{cm}^{-1}$ ; HRMS calculated for  $\text{C}_{19}\text{H}_{18}\text{BrNO}_4$   $[\text{M}+\text{H}]^+$  404.0492, found 404.0496.

**Methyl (*E*)-3-(2-(5-chloro-2-hydroxyphenyl)-2H-benzo[*d*][1,3]oxazin-1(4*H*)-yl)acrylate (5d)**

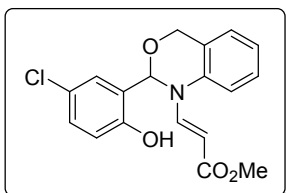

Yield : 84%; M. P : 201-202°C; Reaction time : 6 h;  $^1\text{H}$  NMR (400 MHz,  $\text{CDCl}_3$ ) :  $\delta$  3.55 (s, 3H), 4.57 (s, 2H), 4.72 (d,  $J = 12$  Hz, 1H), 6.39 (s, 1H), 6.71 – 7.69 (m, 7H), 7.95 (d,  $J = 12\text{Hz}$ , 1H), 9.98 (s, 1H) ;  $^{13}\text{C}$  NMR (100 MHz,  $\text{CDCl}_3$ ) :  $\delta$  49.77, 62.16, 80.35, 91.48, 113.99, 116.77, 121.66, 122.33, 122.54, 124.23, 124.28, 125.76, 127.83, 129.14, 136.86, 140.95, 153.53, 167.39; IR (KBr) : 1611, 1673, 3237, 3439 $\text{cm}^{-1}$ ; HRMS calculated for  $\text{C}_{18}\text{H}_{16}\text{ClNO}_4$   $[\text{M}+\text{H}]^+$  346.0833, found 346.0838.



**Methyl (*E*)-3-(2-(3-ethoxy-2-hydroxyphenyl)-2H-benzo[*d*][1,3]oxazin-1(*4H*)-yl)acrylate (5e)**

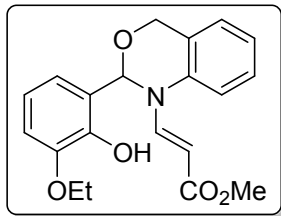

Yield : 87%; M. P : 203-204°C; Reaction time : 5 h; <sup>1</sup>H NMR (400 MHz, CDCl<sub>3</sub>) : δ 1.46 (t, *J*=7.2 Hz, 3H), 3.66 (s, 3H), 4.10 (q, *J*=6.8 Hz, 2H), 4.66 (s, 2H), 4.89 (d, *J* = 13.6Hz, 1H), 6.16 (s, 1H), 6.53 – 7.03 (m, 8H), 8.14 (d, *J* = 13.6 Hz, 1H); <sup>13</sup>C NMR (75 MHz, CDCl<sub>3</sub>) : δ 14.99, 31.04, 51.11, 63.03, 64.89, 81.85, 92.97, 112.64, 114.91, 119.39, 119.71, 121.14, 122.53, 124.73, 125.30, 128.75, 138.01, 142.19, 144.33, 146.34, 169.15; IR (KBr) : 1631, 3045, 3240, 3429cm<sup>-1</sup>; HRMS calculated for C<sub>25</sub>H<sub>21</sub>ClN<sub>3</sub>O<sub>2</sub> [M+Na]<sup>+</sup> 378.1317, found 378.1324

**Dimethyl 2-(2-(2-((4-methylphenyl)sulfonamido)phenyl)benzo[*d*]oxazol-3(*2H*)-yl)fumarate (7a)**

(7a)

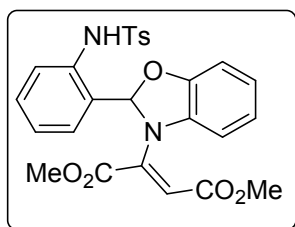

Yield : 72%; yellow solid, M. P : 159-160°C; Reaction time : 8 h; <sup>1</sup>H NMR (400 MHz, CDCl<sub>3</sub>) : δ 2.19 (s, 3H), 3.62 (s, 3H), 4.01 (s, 3H), 5.02 (s, 1H), 6.77 – 7.58 (m, 12H), 8.19 (d, *J* = 1.6 Hz, 1H), 8.20 (s, 1H); <sup>13</sup>C NMR (75 MHz, CDCl<sub>3</sub>) : δ 21.57, 51.94, 53.68, 105.71, 115.11, 116.62, 120.29, 128.49, 128.60, 129.86, 130.76, 132.23, 132.45, 133.75, 134.51, 134.59, 136.60, 145.98, 147.95, 150.90, 152.79, 164.45, 166.45 ; IR (KBr) : 1765, 1790, 3251, 3445cm<sup>-1</sup>; HRMS calculated for C<sub>26</sub>H<sub>24</sub>N<sub>2</sub>O<sub>7</sub>S [M+H]<sup>+</sup> 509.1380, found 509.1361.

**Methyl (*E*)-3-(2-(3-ethoxy-2-hydroxyphenyl)-2H-benzo[*d*][1,3]oxazin-1(*4H*)-yl)acrylate (7b)**

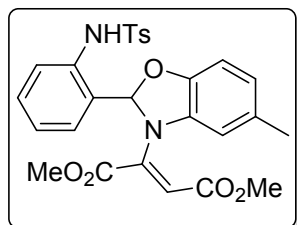

Yield : 78%; Pink solid, M. P : 171-172°C; Reaction time : 8 h;  $^1\text{H}$  NMR (400 MHz,  $\text{CDCl}_3$ ) :  $\delta$  2.22 (s, 3H), 2.34 (s, 3H), 3.62 (s, 3H), 4.01 (s, 3H), 5.02 (s, 1H), 6.85 – 8.50 (m, 10 H), 8.79 (s, 1H);  $^{13}\text{C}$  NMR (75 MHz,  $\text{CDCl}_3$ ) :  $\delta$  21.01, 21.59, 51.93, 53.09, 53.62, 105.67, 114.81, 116.89, 128.53, 128.63, 129.38, 129.83, 130.50, 130.73, 132.11, 132.26, 133.92, 134.15, 134.58, 136.54, 145.93, 147.96, 150.60, 165.49; IR (KBr) : 1735, 1785, 3267, 3466  $\text{cm}^{-1}$ ; HRMS calculated for  $\text{C}_{27}\text{H}_{26}\text{N}_2\text{O}_7\text{S}$   $[\text{M}+\text{H}]^+$  523.1537, found 523.1539.

## X-ray Analysis

### Ethyl (E)-3-(2-(5-bromo-2-hydroxyphenyl)-5-methylbenzo[d]oxazol-3(2H)-yl)acrylate (3d)

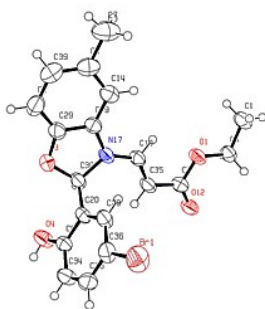

**Table 1. Crystal data and structure refinement for (3d).**

|                        |                                           |
|------------------------|-------------------------------------------|
| Identification code    | EXP-134                                   |
| Empirical formula      | $\text{C}_{19}\text{H}_{18}\text{BrNO}_4$ |
| Formula weight         | 404.25                                    |
| Temperature/K          | 298                                       |
| Crystal system         | monoclinic                                |
| Space group            | $P2_1/a$                                  |
| $a/\text{\AA}$         | 12.8540(7)                                |
| $b/\text{\AA}$         | 9.8269(6)                                 |
| $c/\text{\AA}$         | 14.2696(11)                               |
| $\alpha/^\circ$        | 90                                        |
| $\beta/^\circ$         | 94.215(5)                                 |
| $\gamma/^\circ$        | 90                                        |
| Volume/ $\text{\AA}^3$ | 1797.6(2)                                 |
| Z                      | 4                                         |

|                                                |                                                                    |
|------------------------------------------------|--------------------------------------------------------------------|
| $\rho_{\text{calc}}/\text{cm}^3$               | 1.494                                                              |
| $\mu/\text{mm}^{-1}$                           | 2.310                                                              |
| F(000)                                         | 824.0                                                              |
| Crystal size/ $\text{mm}^3$                    | $0.6 \times 0.2 \times 0.08$                                       |
| Radiation                                      | MoK $\alpha$ ( $\lambda = 0.71073$ )                               |
| 2 $\Theta$ range for data collection/ $^\circ$ | 8.278 to 58.558                                                    |
| Index ranges                                   | $-15 \leq h \leq 17$ , $-12 \leq k \leq 13$ , $-17 \leq l \leq 18$ |
| Reflections collected                          | 10756                                                              |
| Independent reflections                        | 4183 [ $R_{\text{int}} = 0.0402$ , $R_{\text{sigma}} = 0.0560$ ]   |
| Data/restraints/parameters                     | 4183/0/232                                                         |
| Goodness-of-fit on $F^2$                       | 1.017                                                              |
| Final R indexes [ $I \geq 2\sigma(I)$ ]        | $R_1 = 0.0483$ , $wR_2 = 0.1102$                                   |
| Final R indexes [all data]                     | $R_1 = 0.1008$ , $wR_2 = 0.1371$                                   |
| Largest diff. peak/hole / $e \text{ \AA}^{-3}$ | 0.41/-0.47                                                         |

**Methyl (E) -3-(2-(2-hydroxyphenyl)-2H-benzo[d][1,3]oxazin-1(4H)-yl)acrylate (5a)**

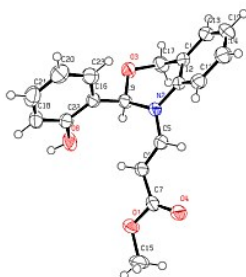

**Table 2. Crystal data and structure refinement for (5a).**

|                     |                                         |
|---------------------|-----------------------------------------|
| Identification code | MB-MM-39                                |
| Empirical formula   | $\text{C}_{19}\text{H}_{18}\text{NO}_3$ |
| Formula weight      | 308.34                                  |
| Temperature/K       | 298(2)                                  |
| Crystal system      | orthorhombic                            |
| Space group         | $P2_12_12_1$                            |
| a/ $\text{\AA}$     | 7.5340(5)                               |
| b/ $\text{\AA}$     | 13.2552(10)                             |

|                                               |                                                               |
|-----------------------------------------------|---------------------------------------------------------------|
| $c/\text{\AA}$                                | 15.2014(12)                                                   |
| $\alpha/^\circ$                               | 90.00                                                         |
| $\beta/^\circ$                                | 90.00                                                         |
| $\gamma/^\circ$                               | 90.00                                                         |
| Volume/ $\text{\AA}^3$                        | 1518.09(19)                                                   |
| Z                                             | 4                                                             |
| $\rho_{\text{calc}}/\text{cm}^3$              | 1.349                                                         |
| $\mu/\text{mm}^{-1}$                          | 0.091                                                         |
| F(000)                                        | 652.0                                                         |
| Crystal size/ $\text{mm}^3$                   | $0.5 \times 0.04 \times 0.03$                                 |
| Radiation                                     | Mo K $\alpha$ ( $\lambda = 0.7107$ )                          |
| $2\Theta$ range for data collection/ $^\circ$ | 8.62 to 58.2                                                  |
| Index ranges                                  | $-10 \leq h \leq 9, -16 \leq k \leq 17, -20 \leq l \leq 20$   |
| Reflections collected                         | 5373                                                          |
| Independent reflections                       | 3203 [ $R_{\text{int}} = 0.0374, R_{\text{sigma}} = 0.0614$ ] |
| Data/restraints/parameters                    | 3203/0/213                                                    |
| Goodness-of-fit on $F^2$                      | 1.011                                                         |
| Final R indexes [ $I \geq 2\sigma(I)$ ]       | $R_1 = 0.0458, wR_2 = 0.0843$                                 |
| Final R indexes [all data]                    | $R_1 = 0.0758, wR_2 = 0.0976$                                 |
| Largest diff. peak/hole / $e \text{\AA}^{-3}$ | 0.14/-0.18                                                    |

# <sup>1</sup>H, <sup>13</sup>C NMR & ESI-HRMS Spectra for the Compounds 3a-s, 5a-e & 7a-b

PROTON CDC13 {D:\MB} KOPAL 1

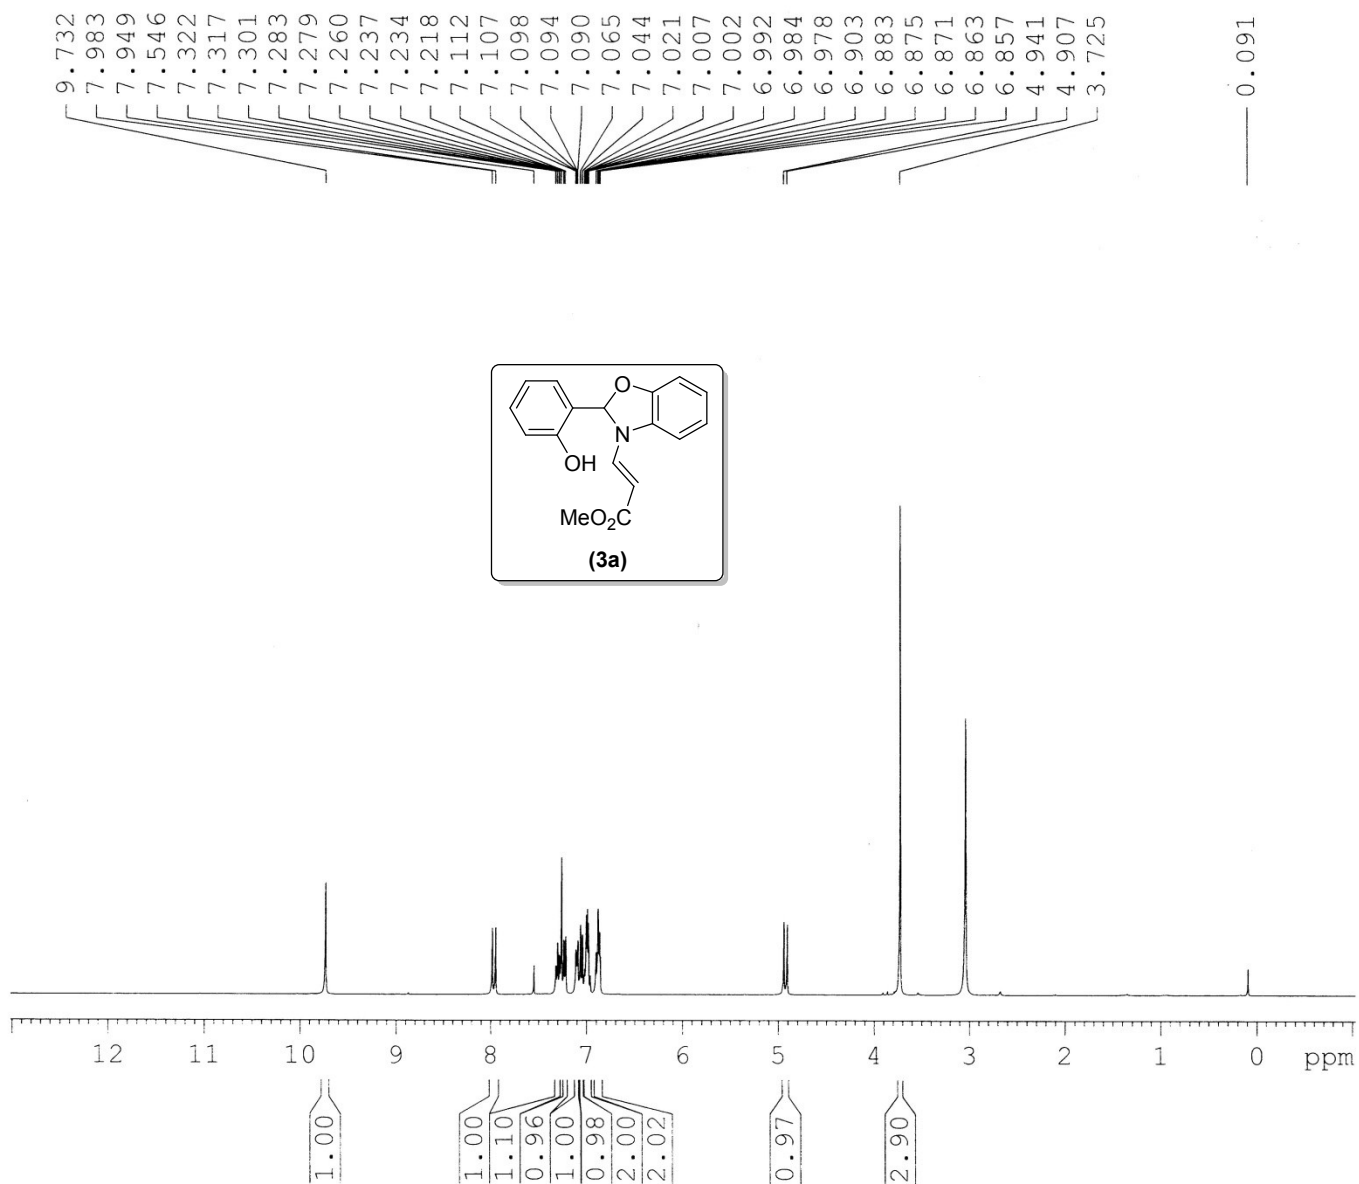

C13CPD CDC13 {D:\MB} KOPAL 1

168.12  
155.17  
149.78  
137.78  
131.89  
130.91  
126.67  
122.67  
120.98  
120.88  
119.40  
115.94  
108.70  
107.38  
92.09  
90.67  
77.48  
77.16  
76.84  
50.51  
40.03  
39.82  
39.61  
39.41  
39.20  
38.98

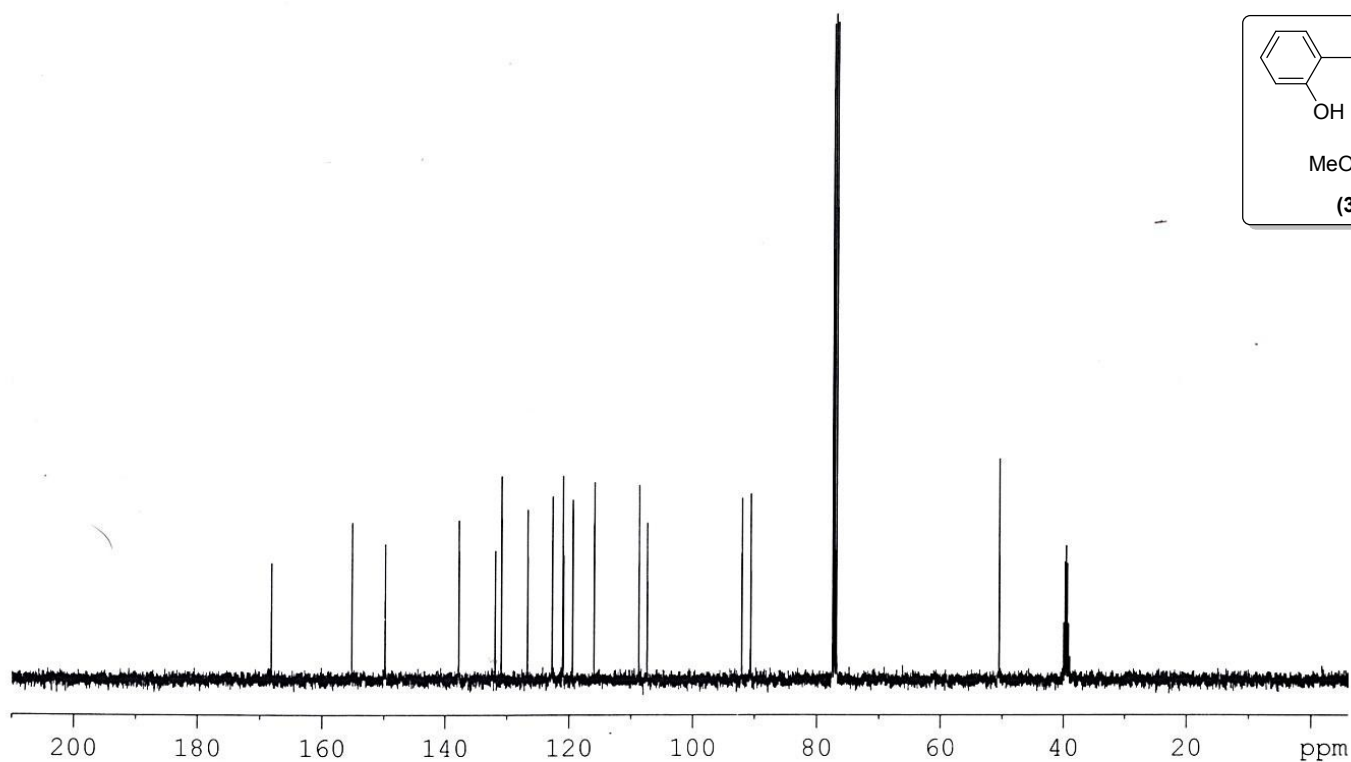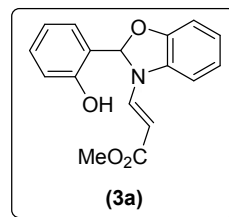

|               |         |             |                      |                 |        |                        |               |
|---------------|---------|-------------|----------------------|-----------------|--------|------------------------|---------------|
| Sample Name   | MM-29   | Position    |                      | Instrument Name | Q-TOF  | User Name              | QTOF-PU\admin |
| Inj Vol       | -1      | InjPosition |                      | SampleType      | Sample | IRM Calibration Status | Success       |
| Data Filename | MM-29.d | ACQ Method  | Pondicherry Universi | Comment         |        |                        |               |

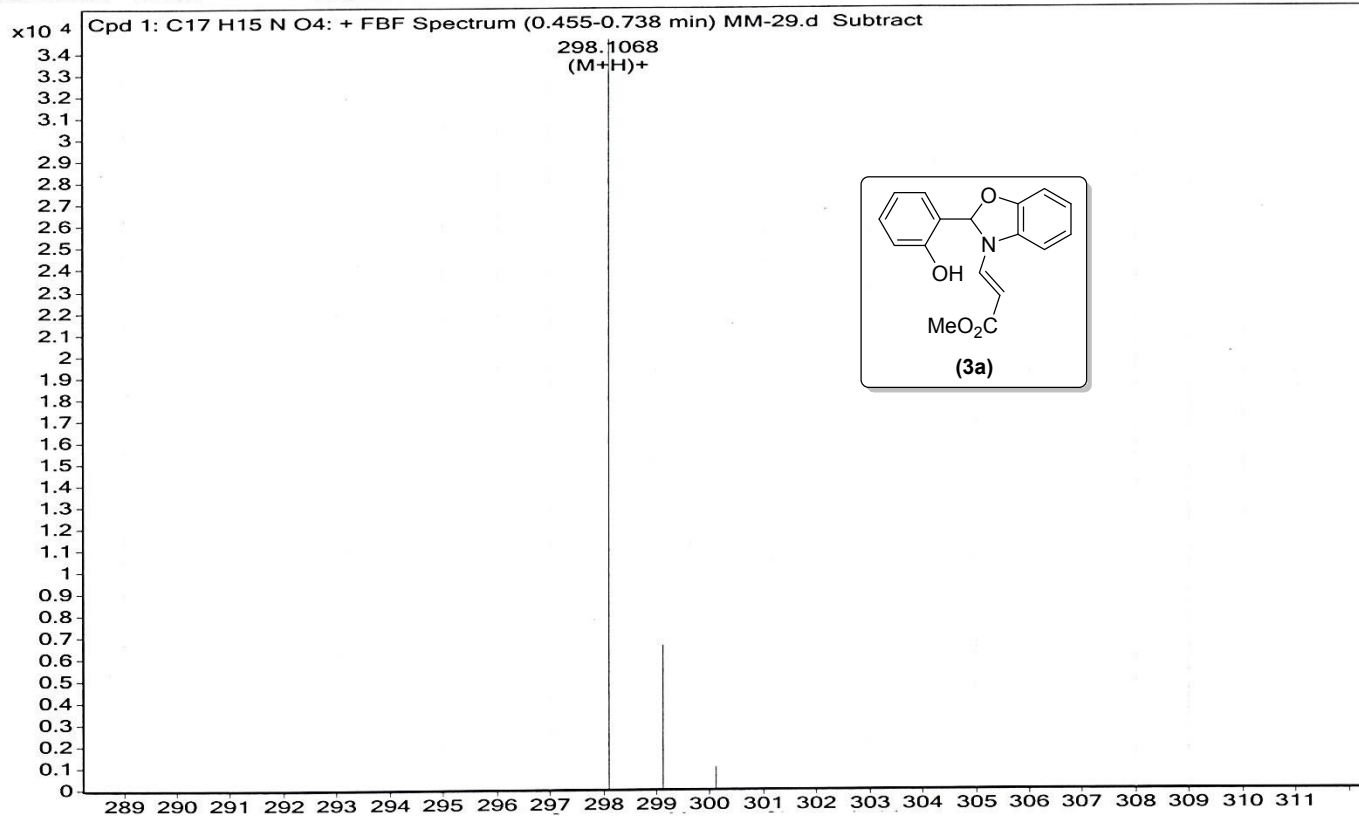

PROTON DMSO {D:\MB} KOPAL 1

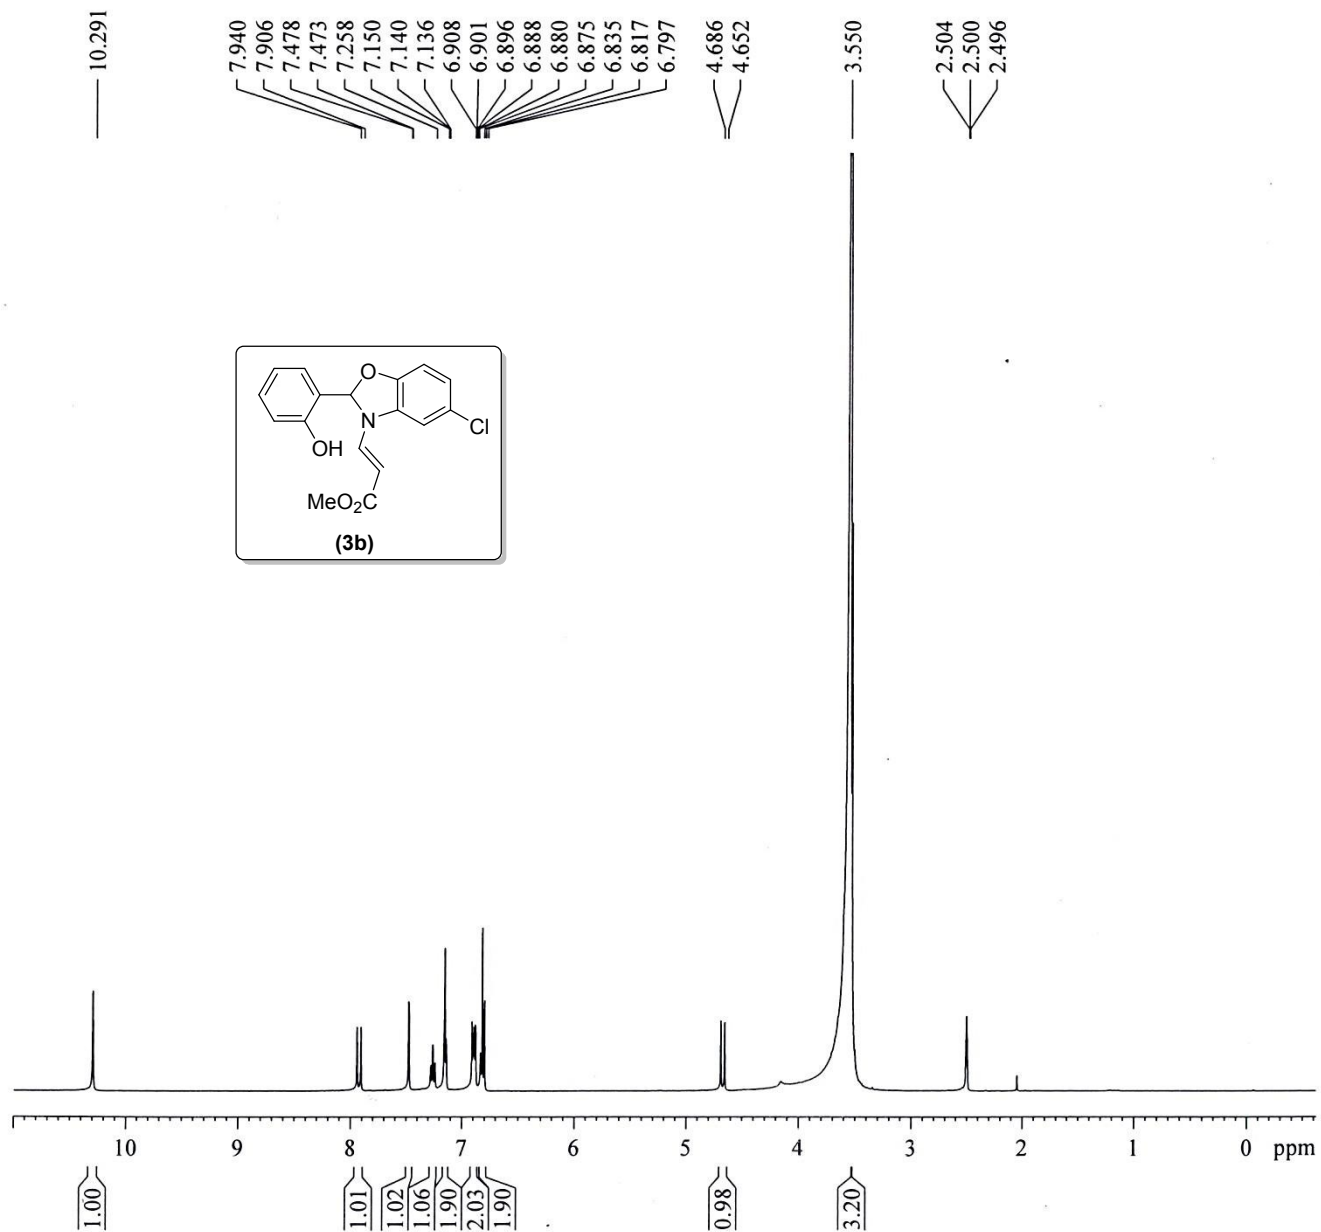



<sup>13</sup>CPD DMSO {D:\MB} KOPAL 1

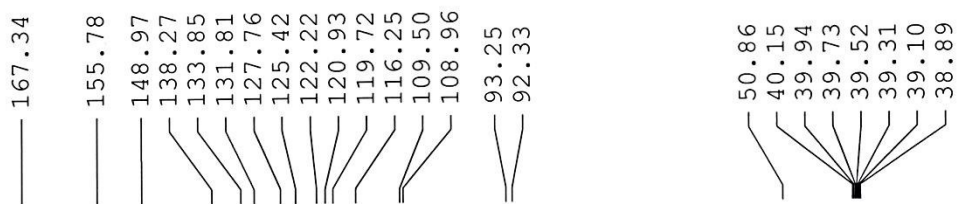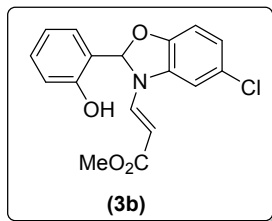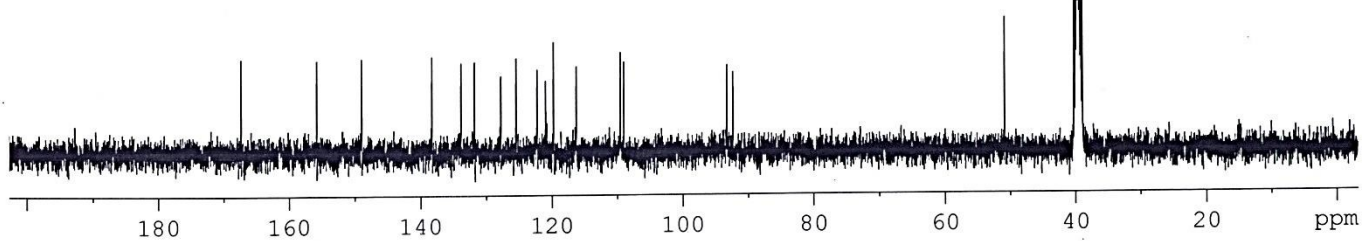

|               |          |             |                      |                 |        |                        |               |
|---------------|----------|-------------|----------------------|-----------------|--------|------------------------|---------------|
| Sample Name   | MM-153   | Position    |                      | Instrument Name | Q-TOF  | User Name              | QTOF-PU\admin |
| Inj Vol       | -1       | InjPosition |                      | SampleType      | Sample | IRM Calibration Status | Success       |
| Data Filename | MM-153.d | ACQ Method  | Pondicherry Universi |                 |        |                        |               |

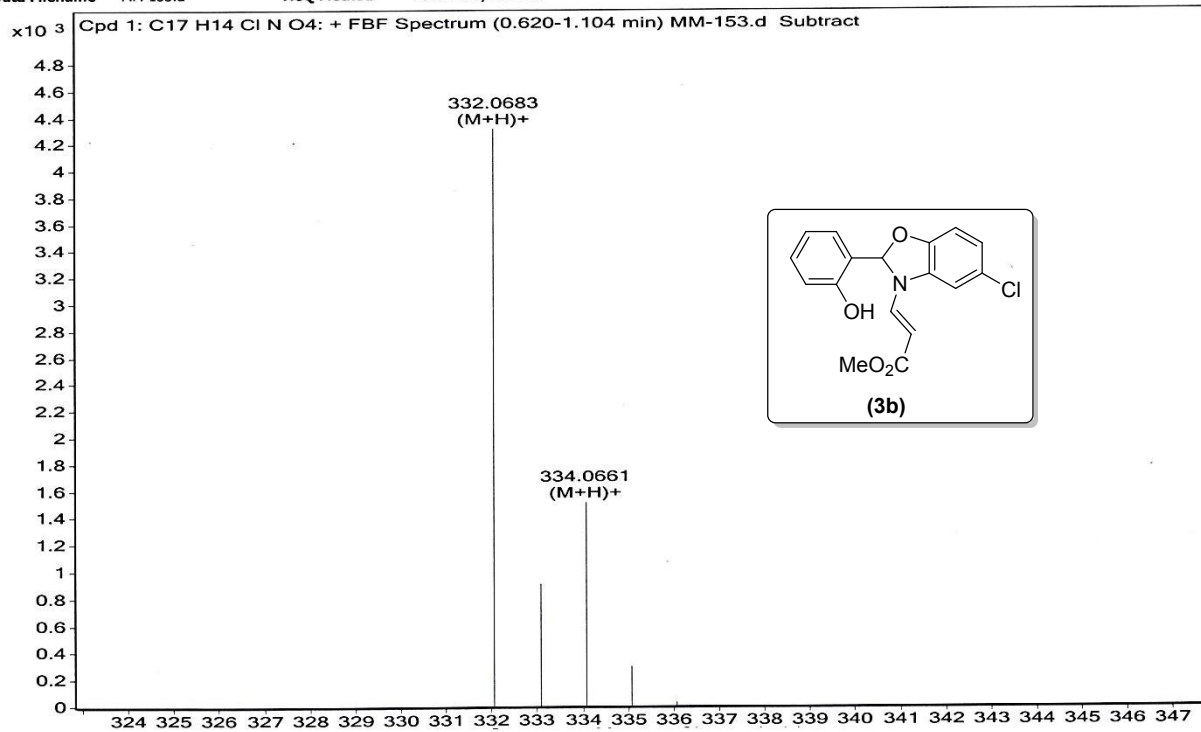

PROTON CDC13 {D:\MB} KOPAL 1

9.723  
7.855  
7.822  
7.583  
7.202  
7.182  
7.134  
7.126  
7.103  
6.963  
6.943  
6.850  
6.801  
6.782  
6.764  
6.678  
6.657  
6.638  
4.812  
4.778  
3.630  
2.589  
2.332

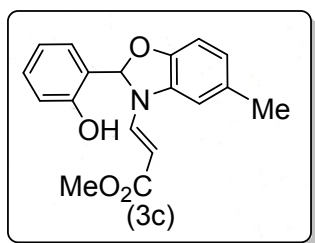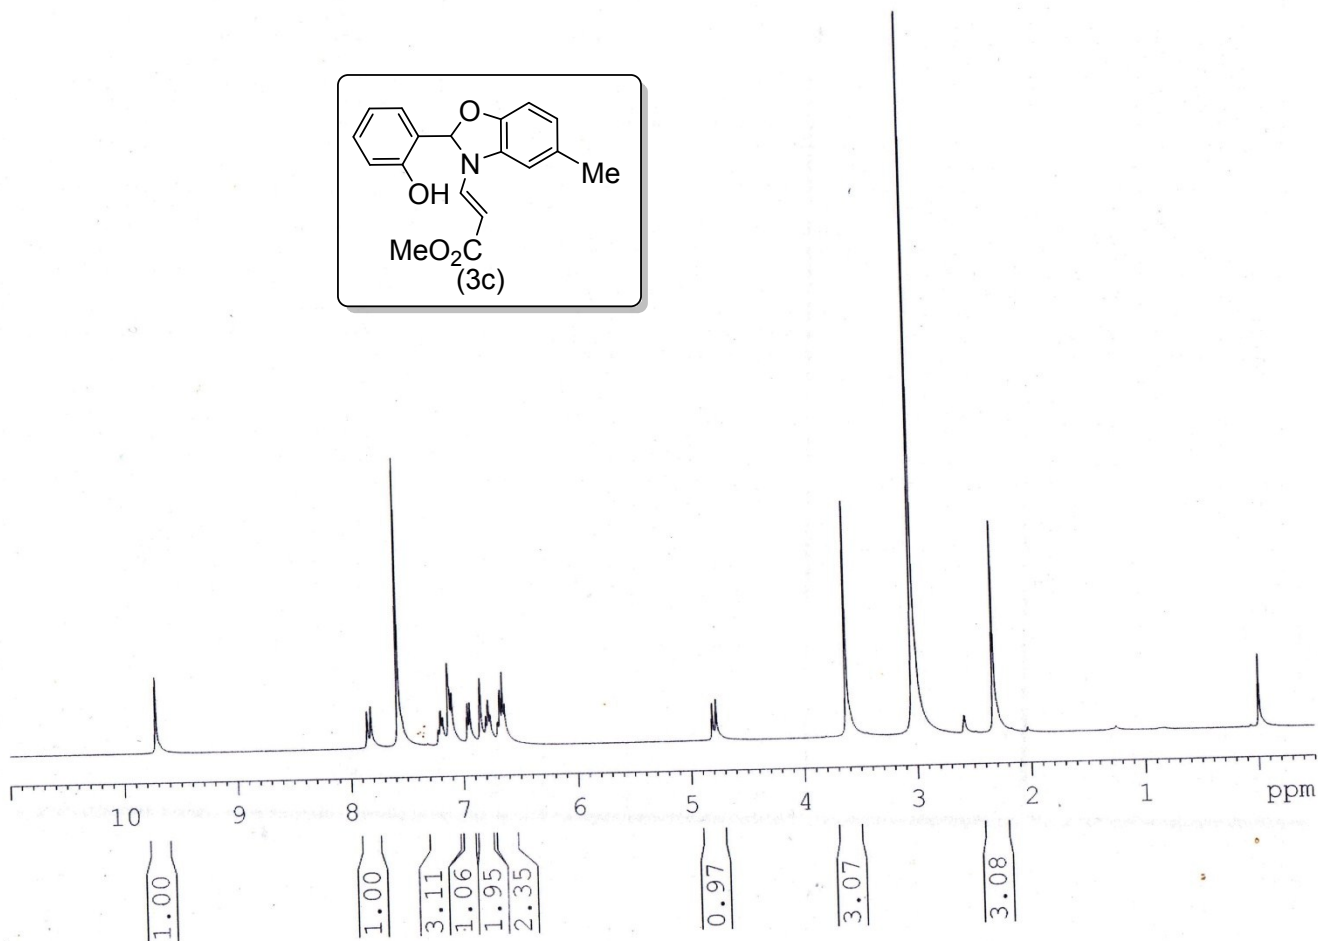

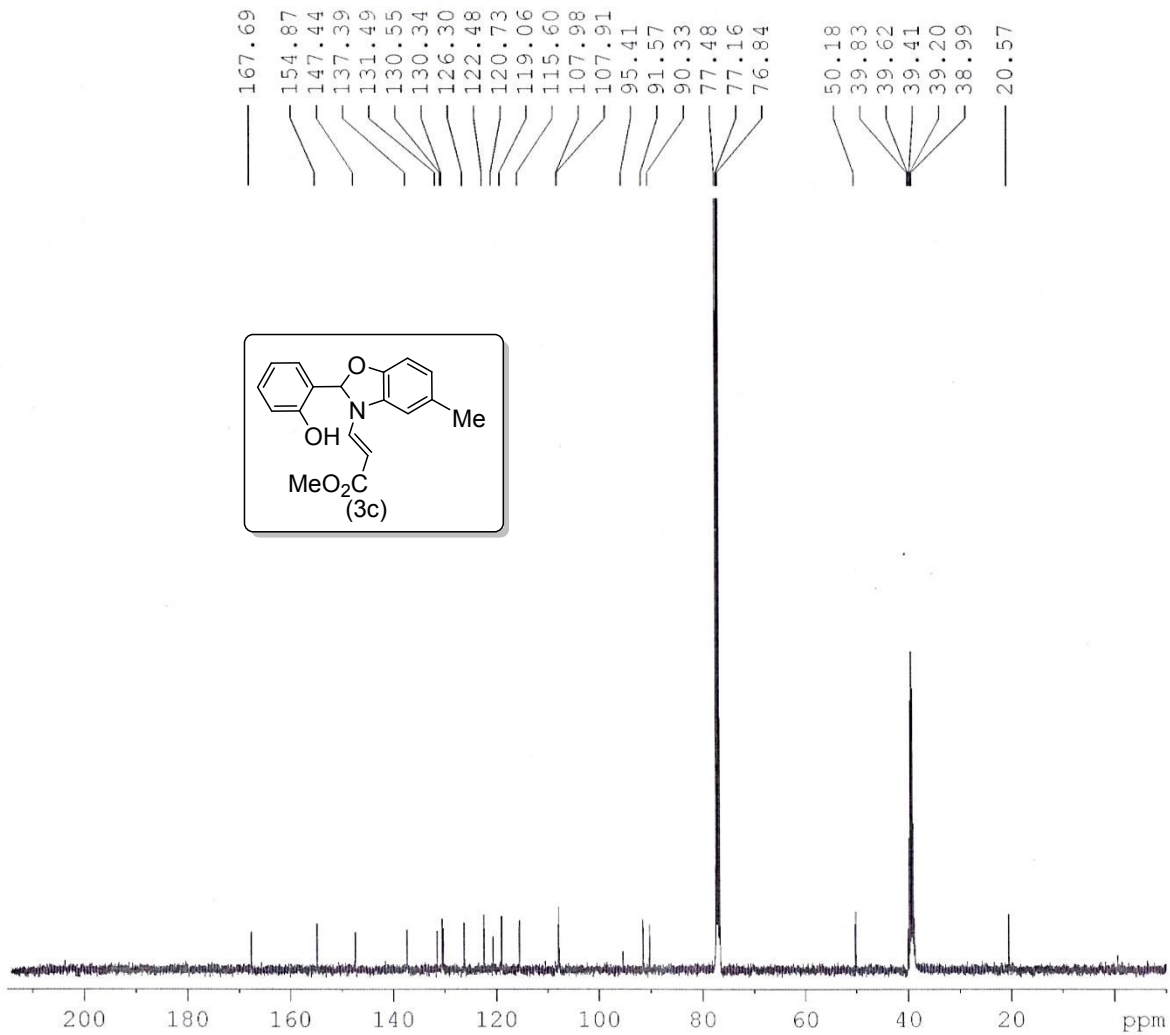

|               |          |             |                      |                 |        |                        |               |
|---------------|----------|-------------|----------------------|-----------------|--------|------------------------|---------------|
| Sample Name   | MM-152   | Position    |                      | Instrument Name | Q-TOF  | User Name              | QTOF-PU\admin |
| Inj Vol       | -1       | InjPosition |                      | SampleType      | Sample | IRM Calibration Status | Success       |
| Data Filename | MM-152.d | ACQ Method  | Pondicherry Universi |                 |        |                        |               |

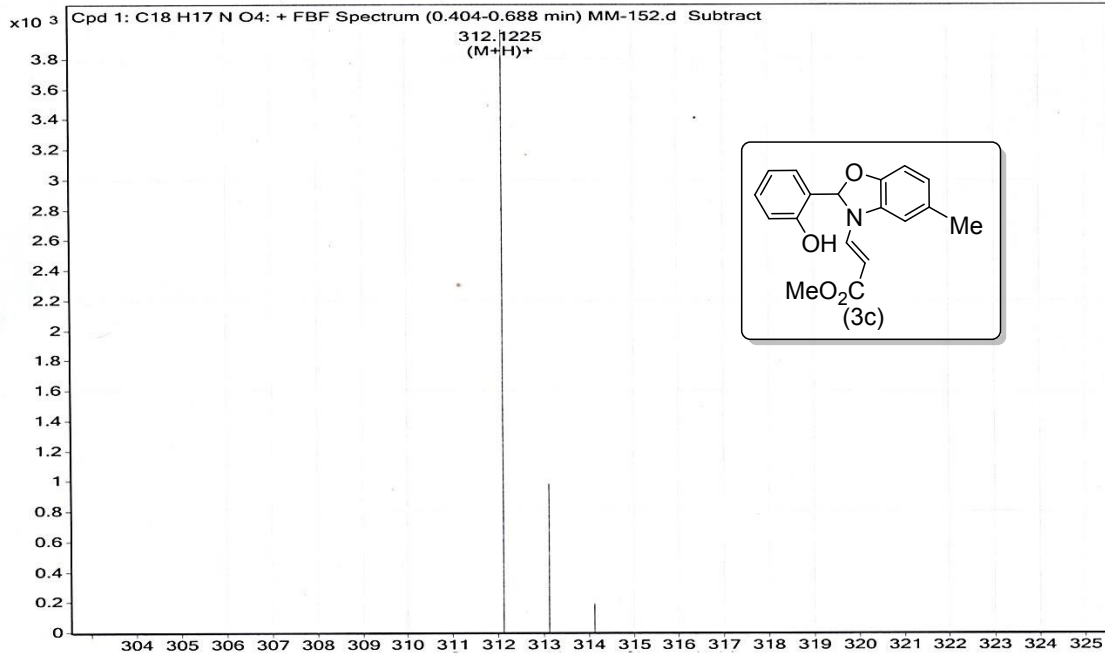

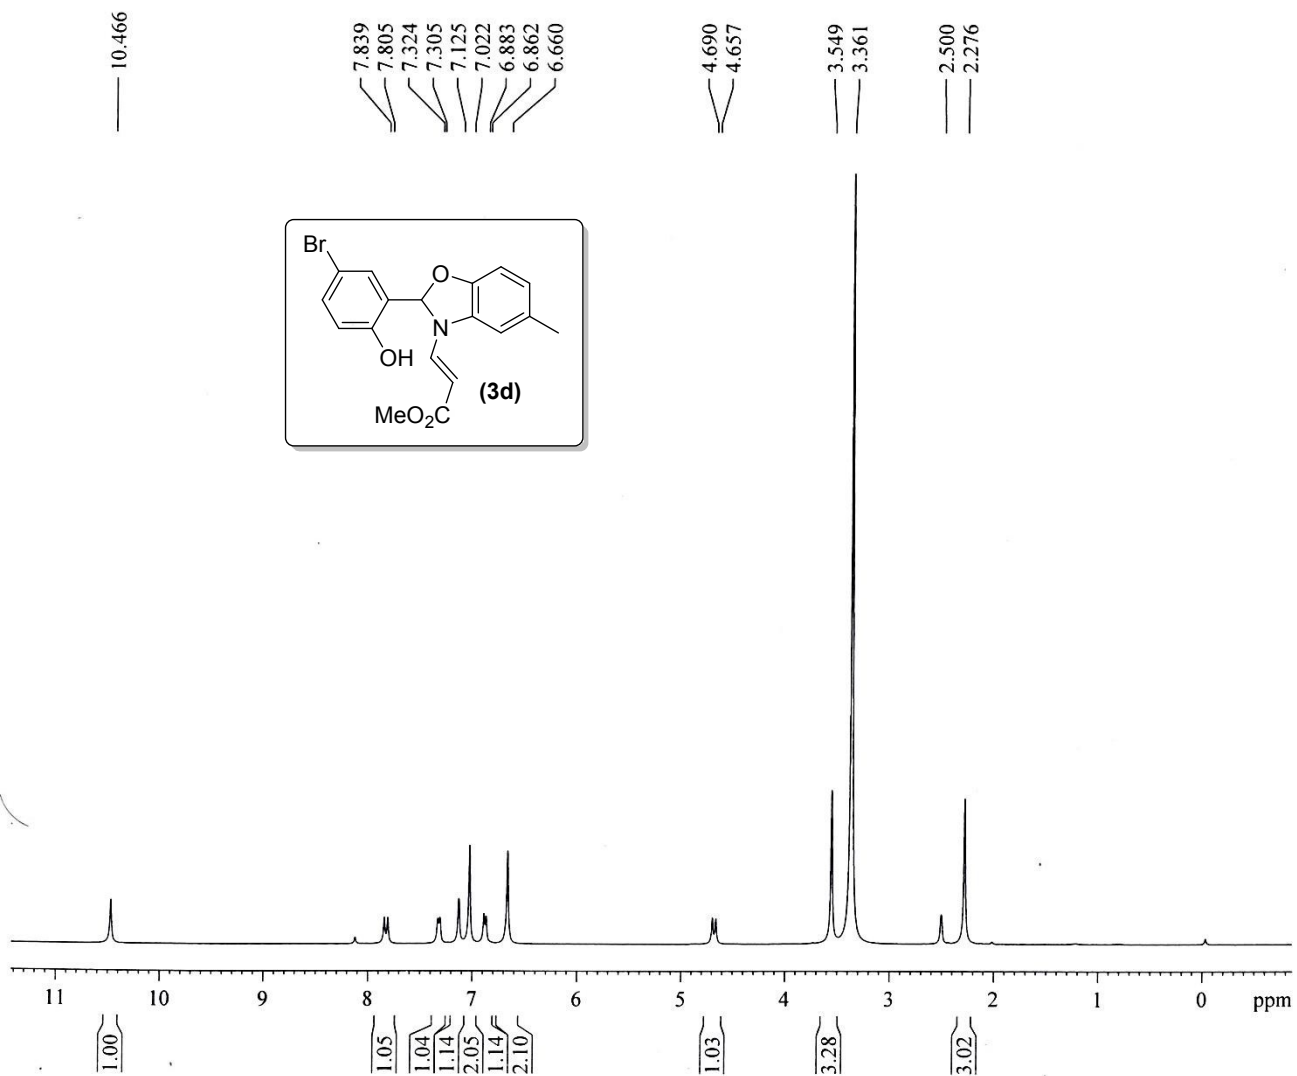

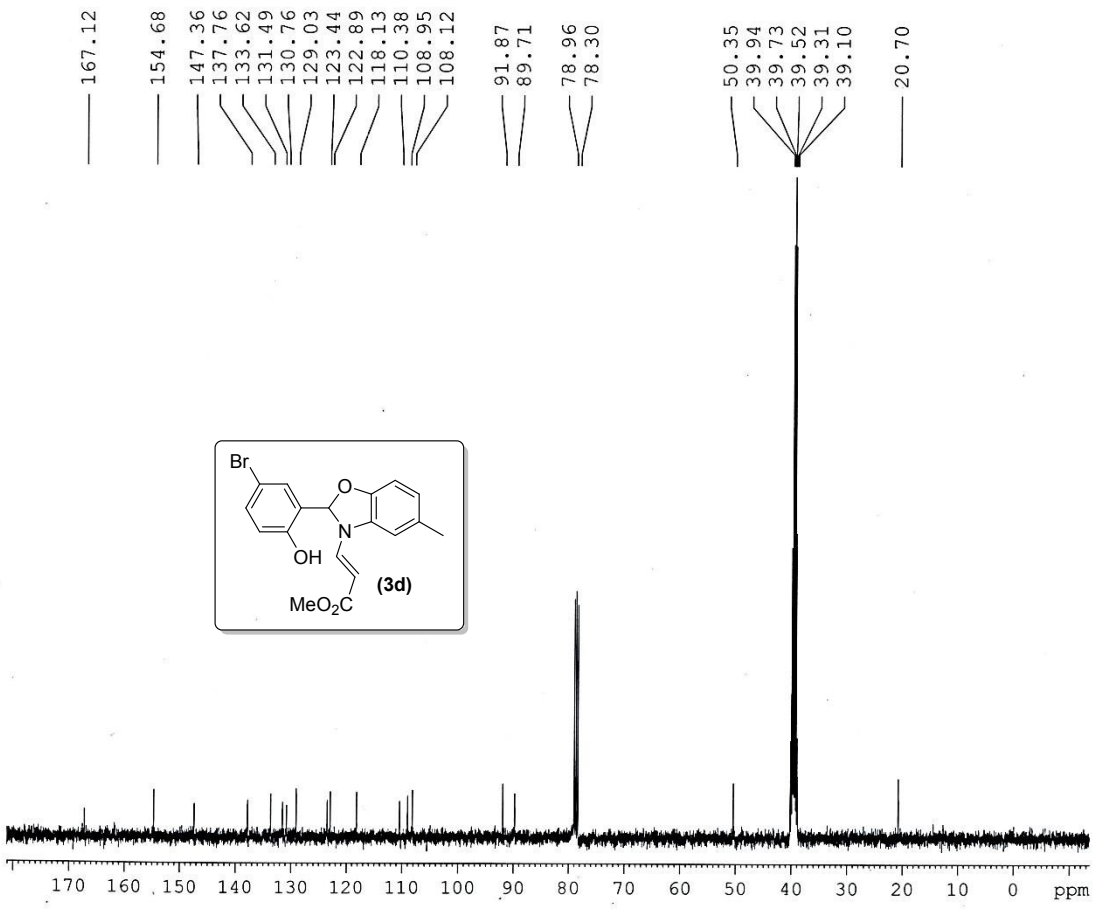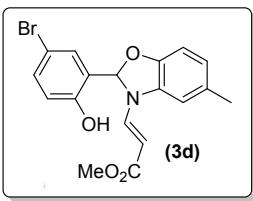

Sample Name MM-137      Position      Instrument Name Q-TOF      User Name      QTOF-PU\admin  
Inj Vol -1      InjPosition      SampleType      Sample      IRM Calibration Status      Success  
Data Filename MM-137.d      ACQ Method      Pondicherry Universi

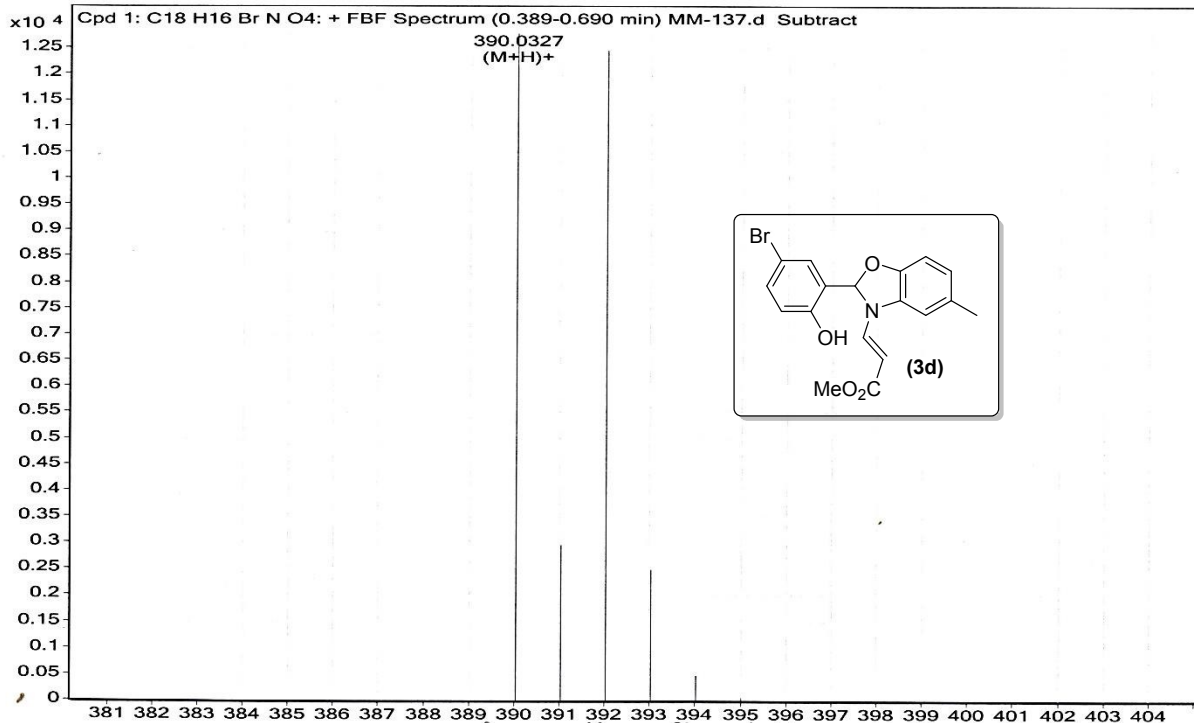



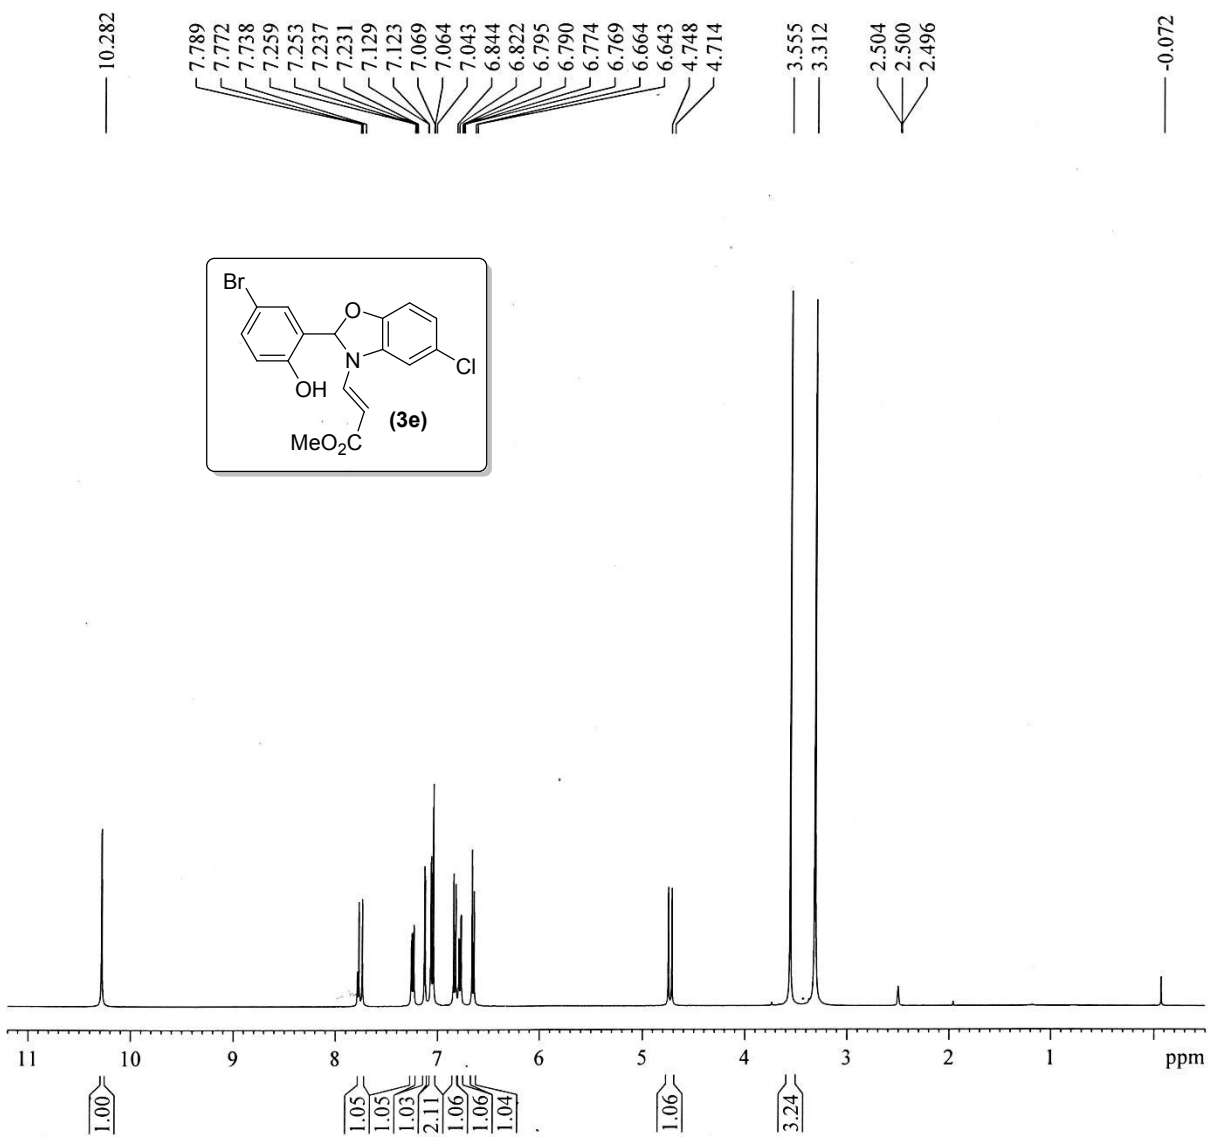

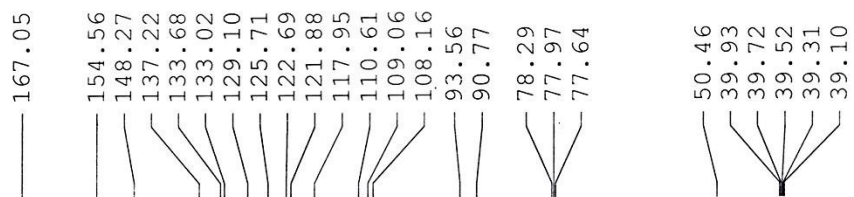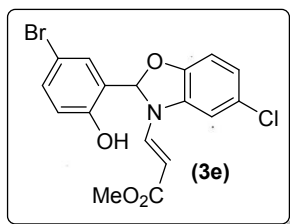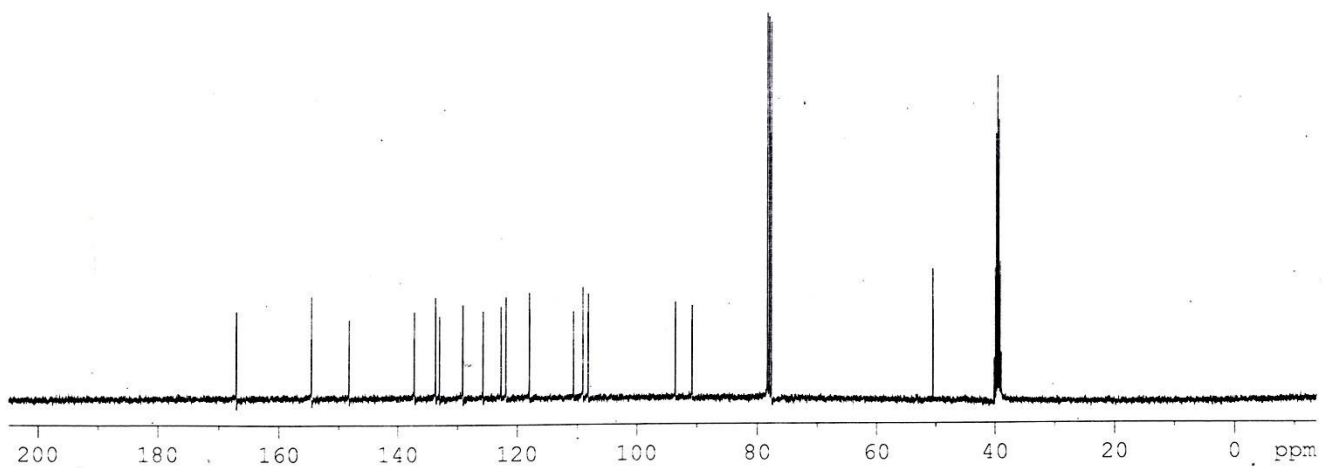

Sample Name MM-141      Position      Instrument Name Q-TOF      User Name QTOF-PUadmin  
Inj Vol -1      InjPosition      SampleType      IRM Calibration Status Success  
Data Filename MM-141.d      ACQ Method      Pondicherry Universi

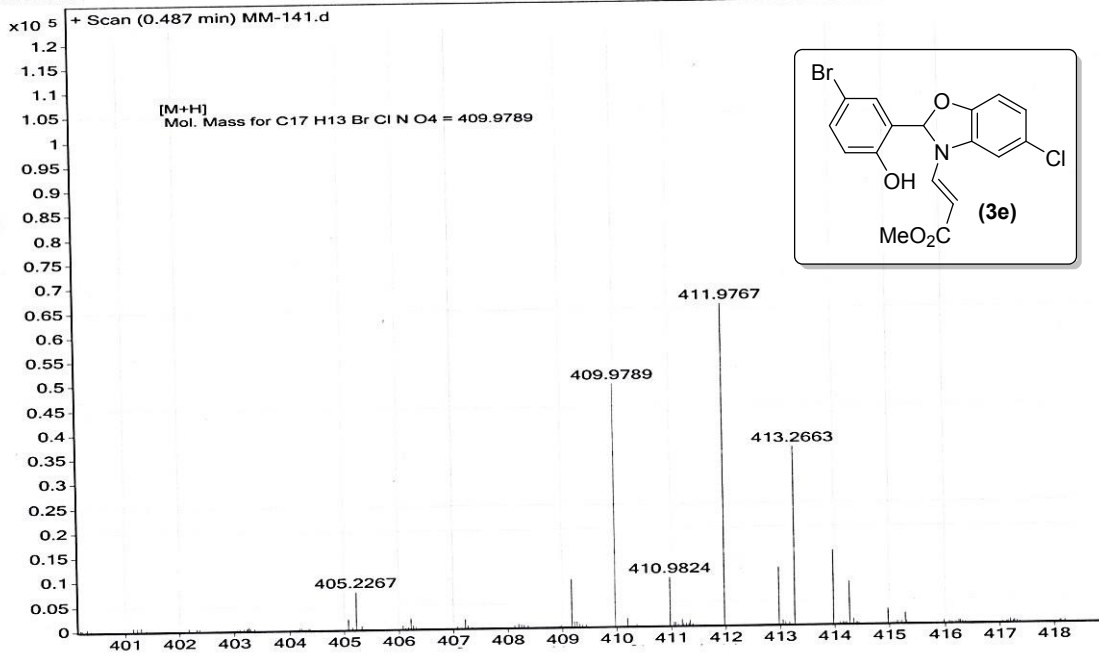

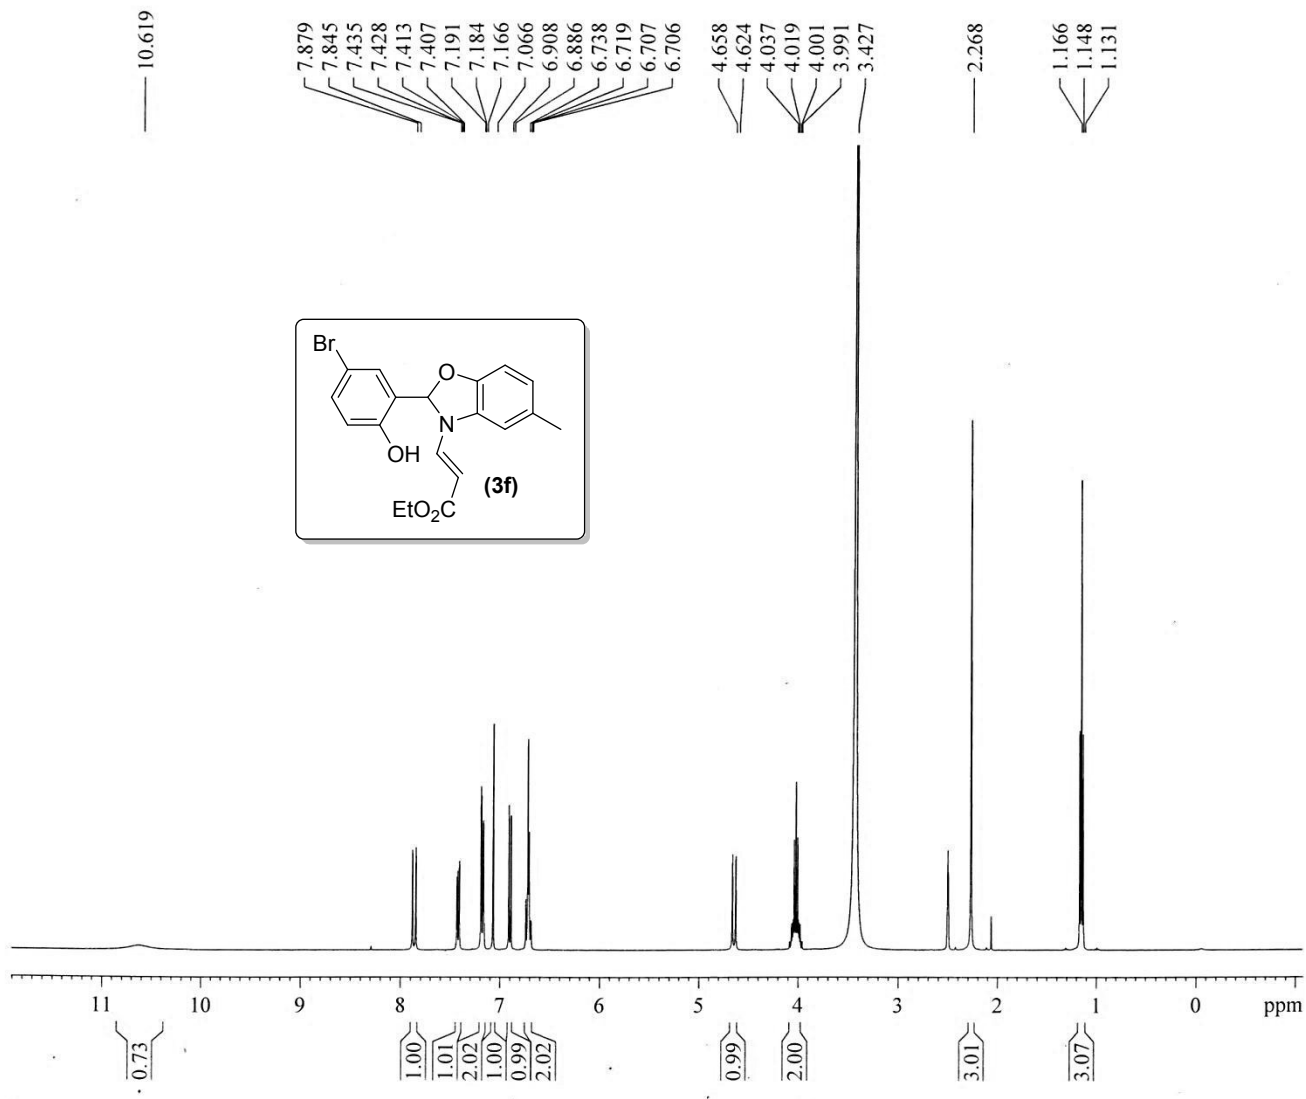

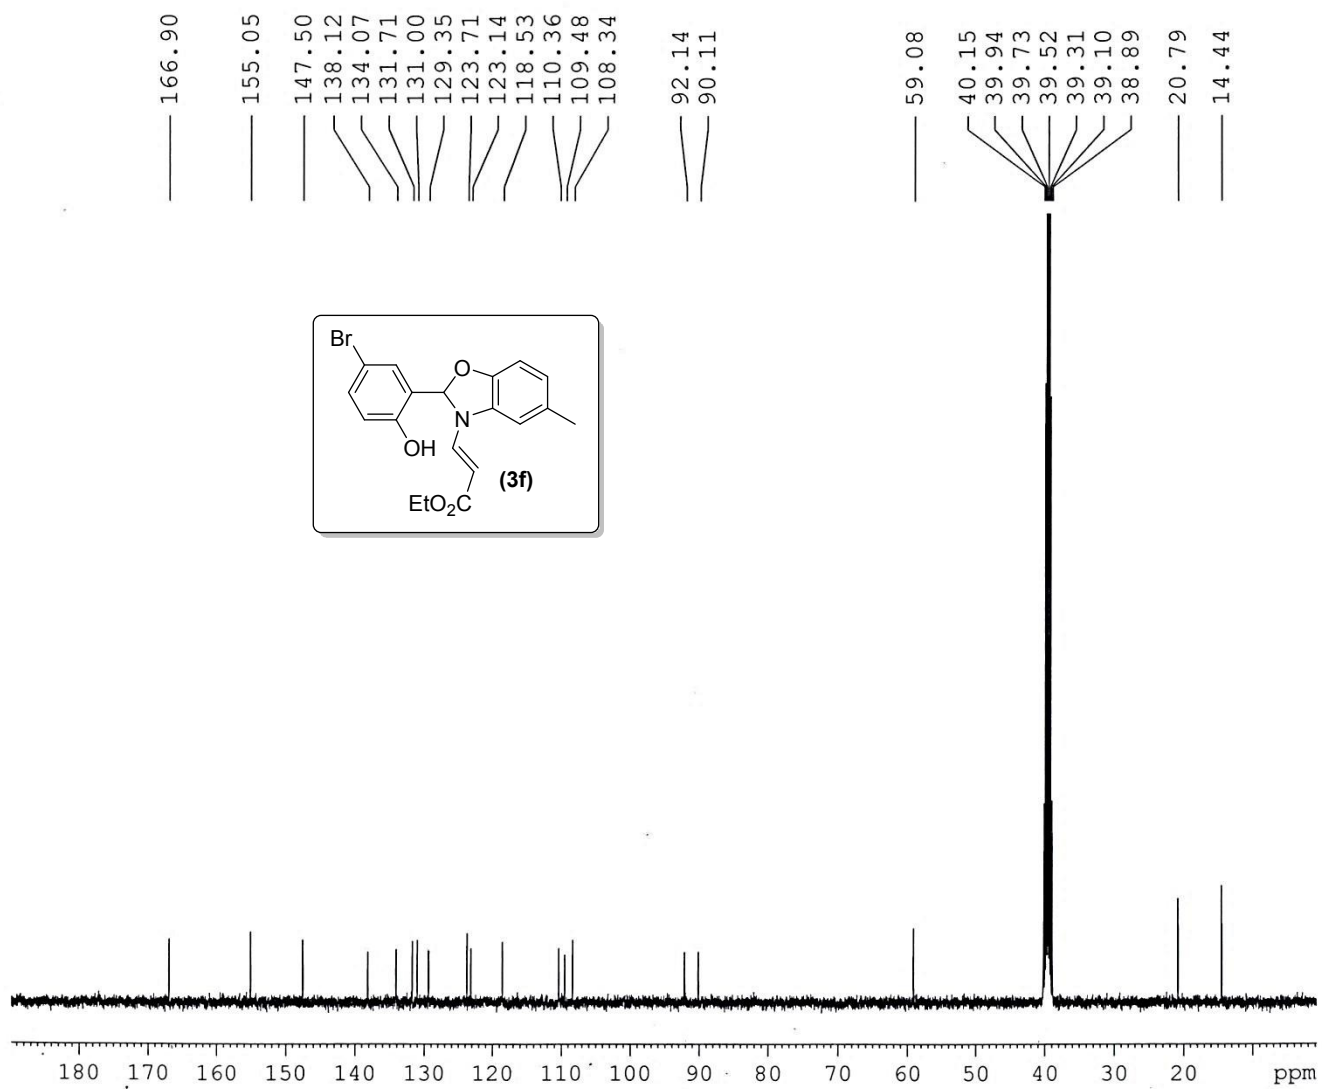

Sample Name MM-134  
Inj Vol -1  
Data Filename MM-134.d

Position  
InjPosition  
ACQ Method Pondicherry Universi

Instrument Name Q-TOF  
SampleType Sample

User Name  
IRM Calibration Status

QTOF-PU\admin  
Success

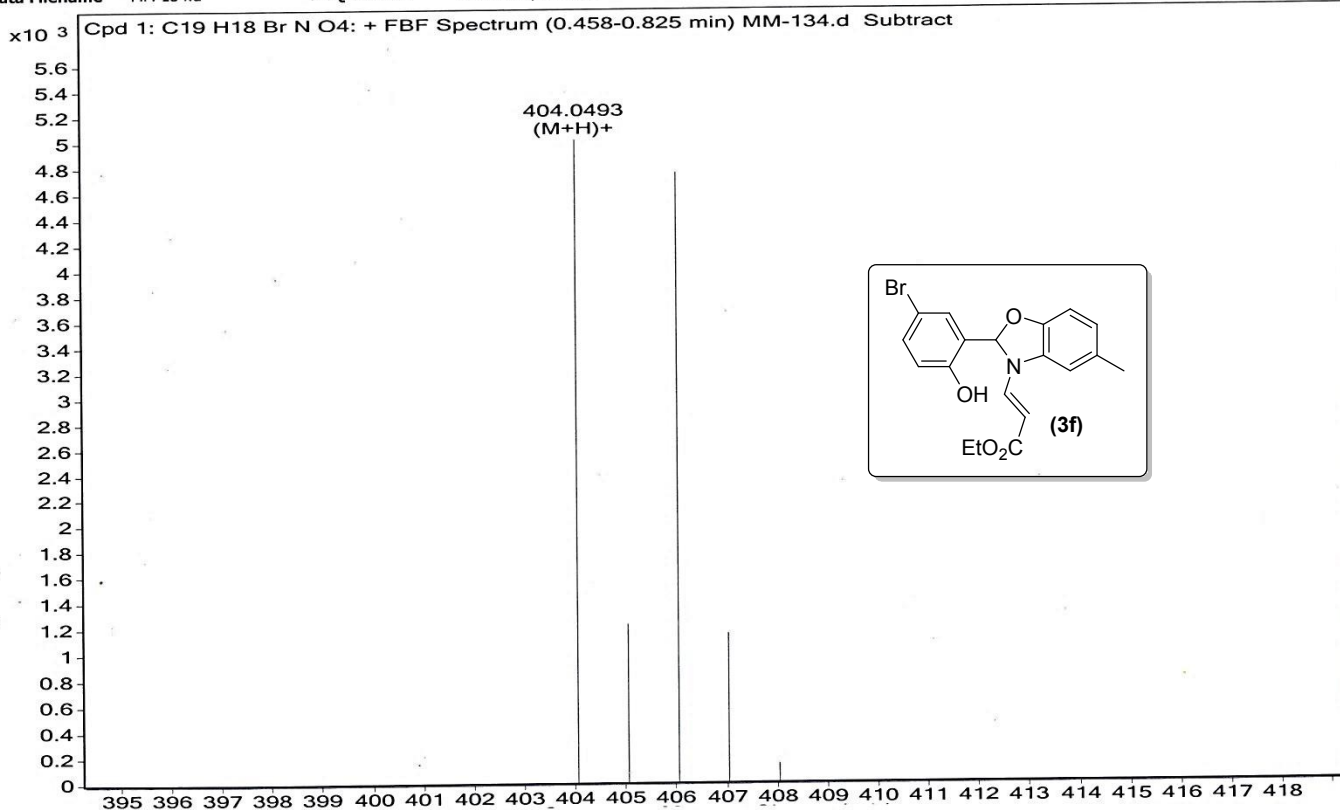

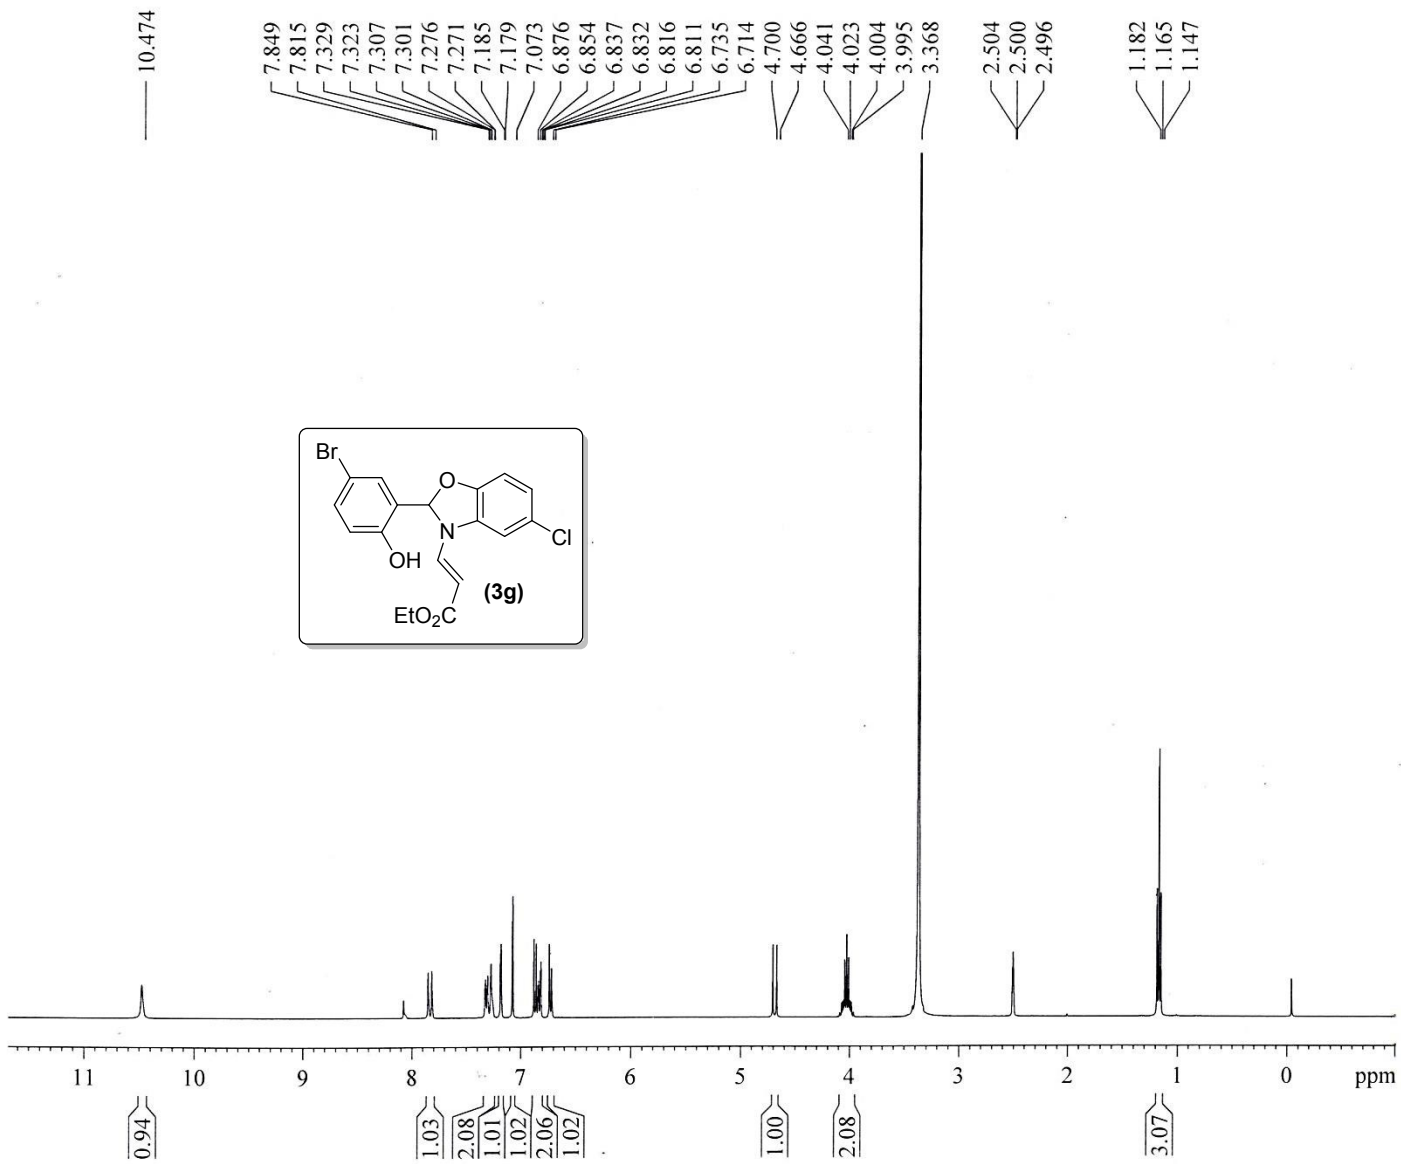

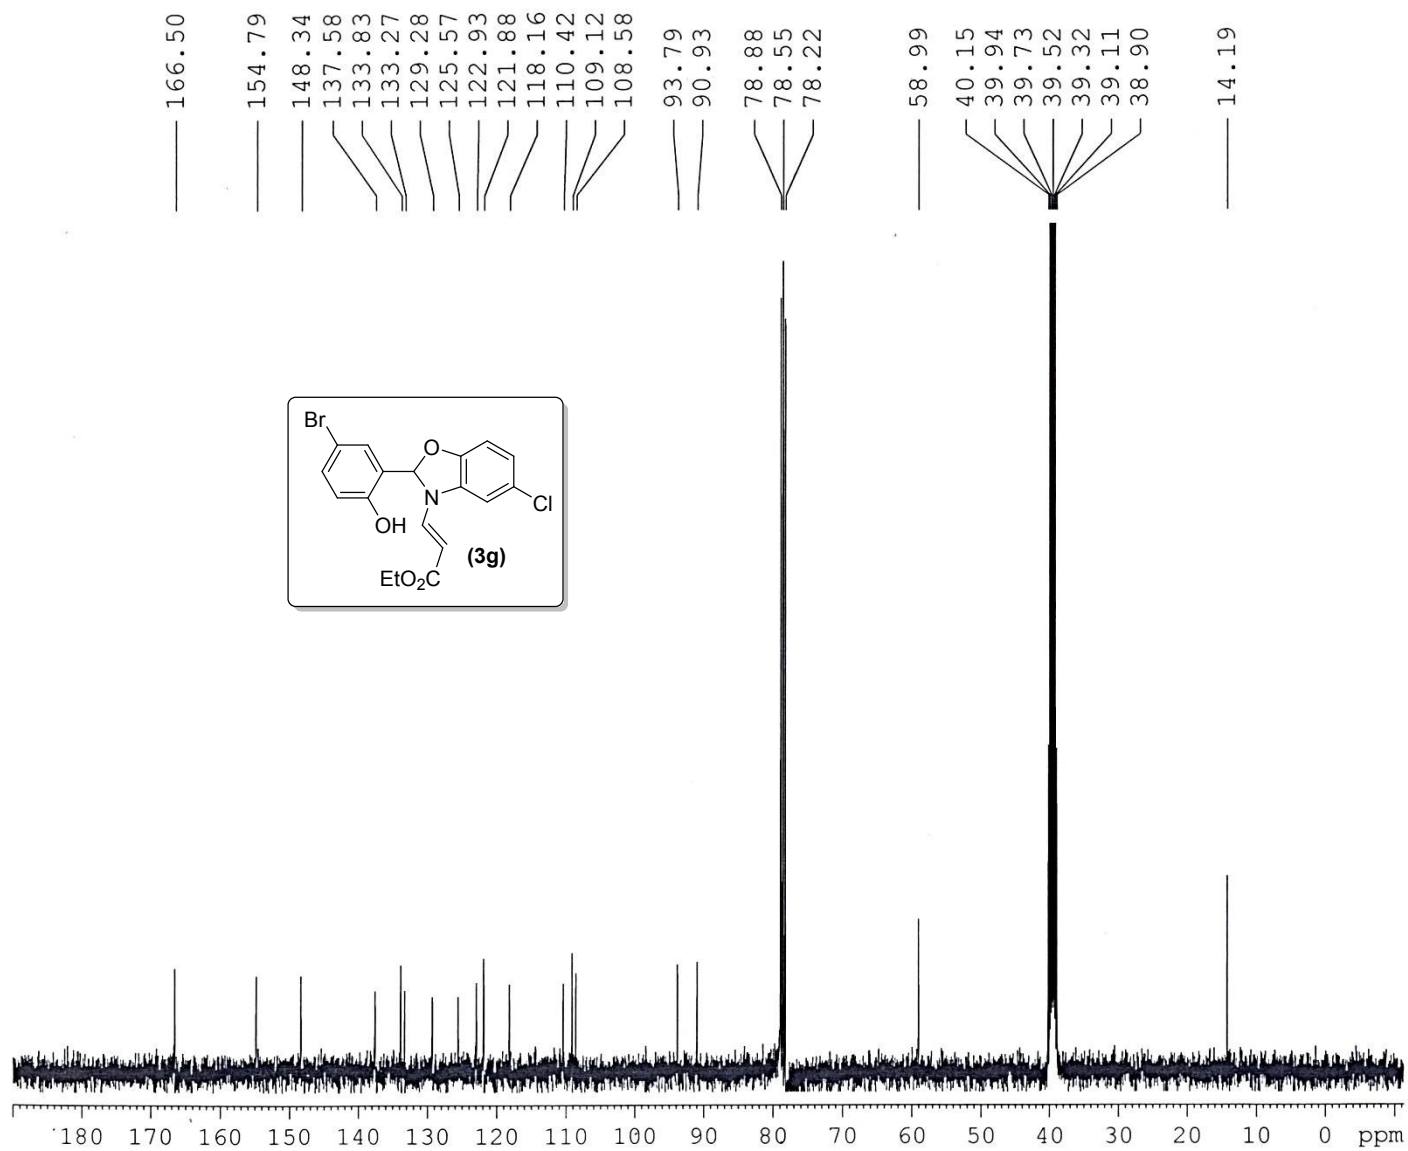



|               |          |             |                      |                 |        |                        |               |
|---------------|----------|-------------|----------------------|-----------------|--------|------------------------|---------------|
| Sample Name   | MM-140   | Position    |                      | Instrument Name | Q-TOF  | User Name              | QTOF-PU\admin |
| Inj Vol       | -1       | InjPosition |                      | SampleType      | Sample | IRM Calibration Status | Success       |
| Data Filename | MM-140.d | ACQ Method  | Pondicherry Universi |                 |        |                        |               |

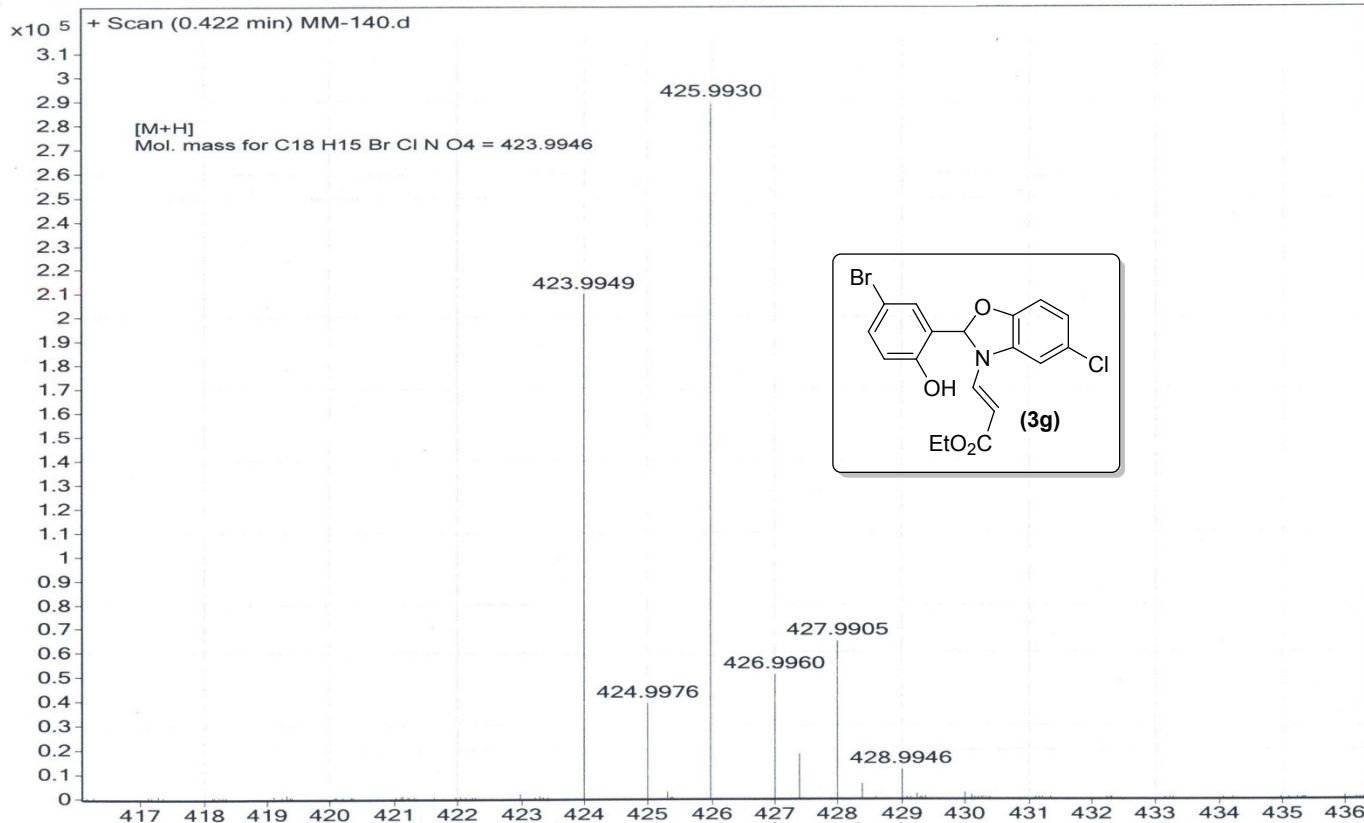

9.012  
8.323  
8.318  
8.239  
8.233  
8.190  
8.184  
8.167  
8.161  
7.809  
7.778  
7.691  
7.686  
7.670  
7.664  
7.260  
7.127  
7.104  
7.081  
7.059  
5.723  
5.692

4.247  
4.229  
4.212  
4.194

1.612  
1.316  
1.298  
1.280

-0.005

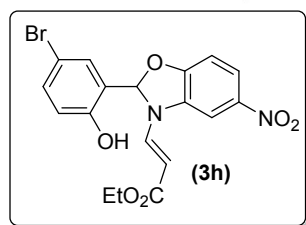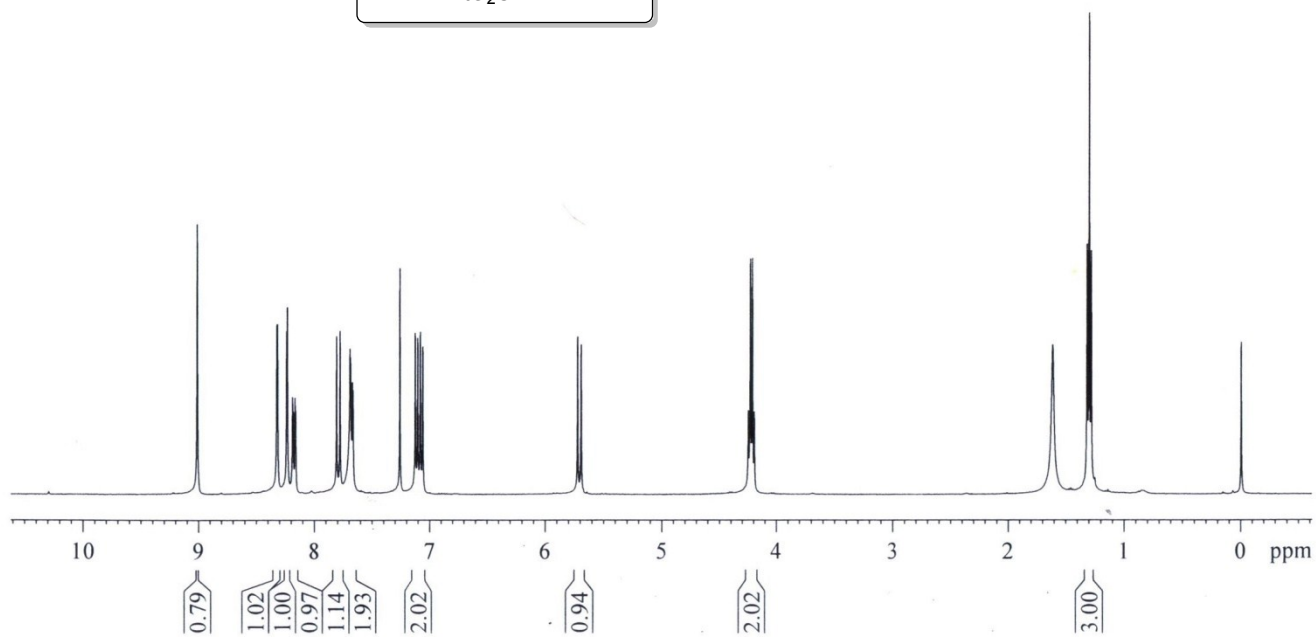

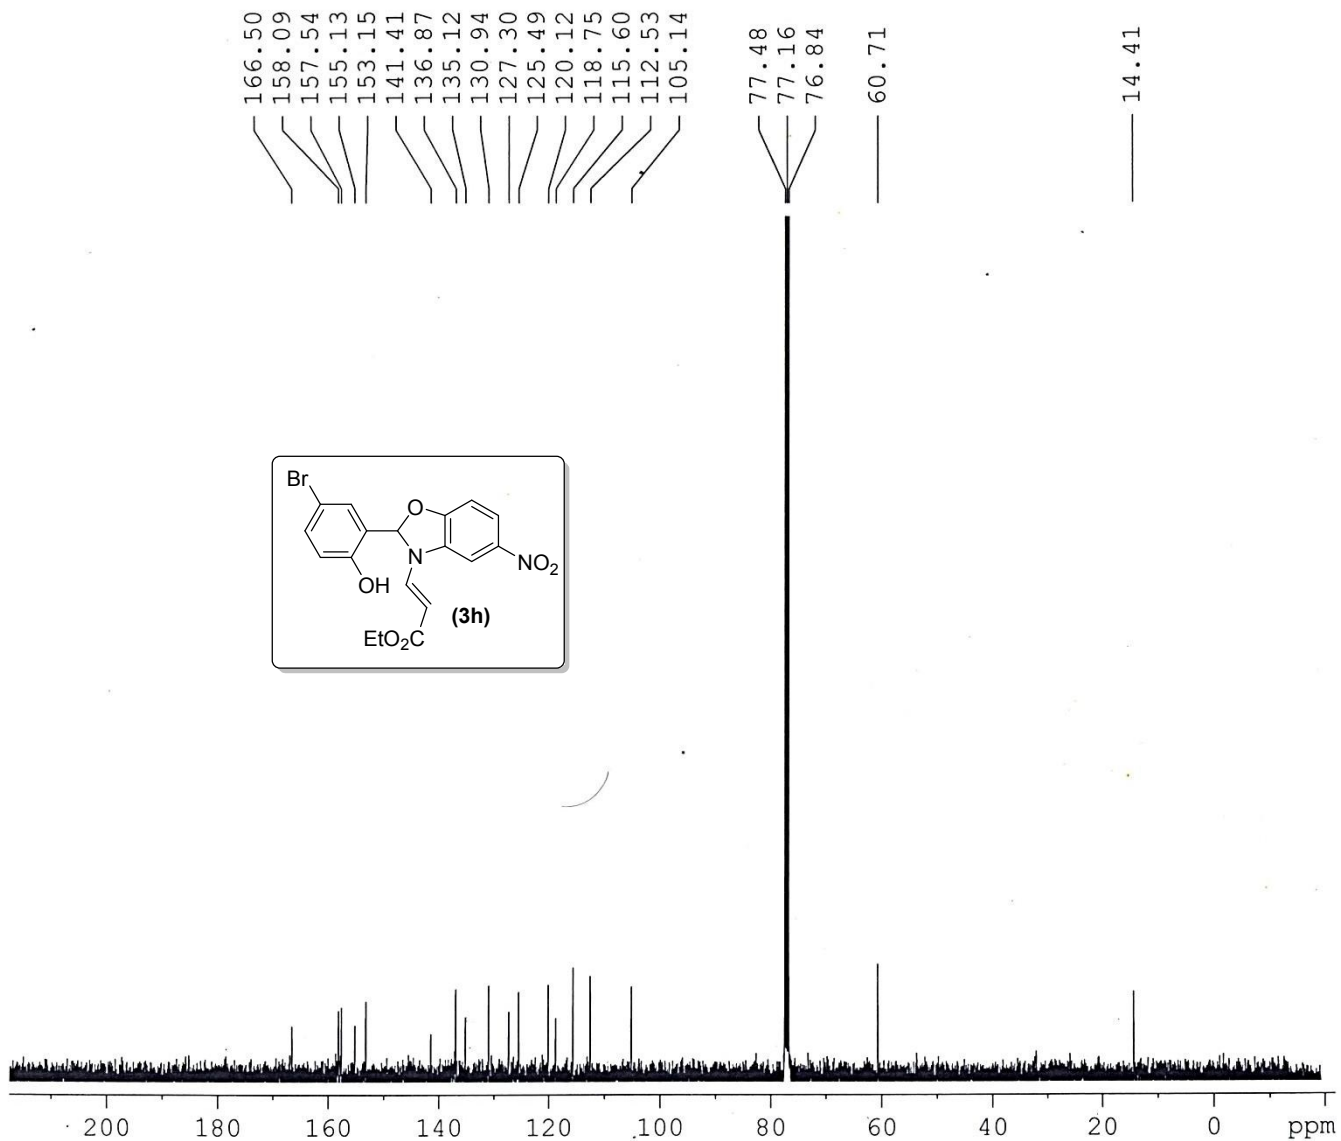

|               |          |             |                      |                 |        |                        |               |
|---------------|----------|-------------|----------------------|-----------------|--------|------------------------|---------------|
| Sample Name   | MM-156   | Position    |                      | Instrument Name | Q-TOF  | User Name              | QTOF-PU\admin |
| Inj Vol       | -1       | InjPosition |                      | SampleType      | Sample | IRM Calibration Status | Success       |
| Data Filename | MM-156.d | ACQ Method  | Pondicherry Universi |                 |        |                        |               |

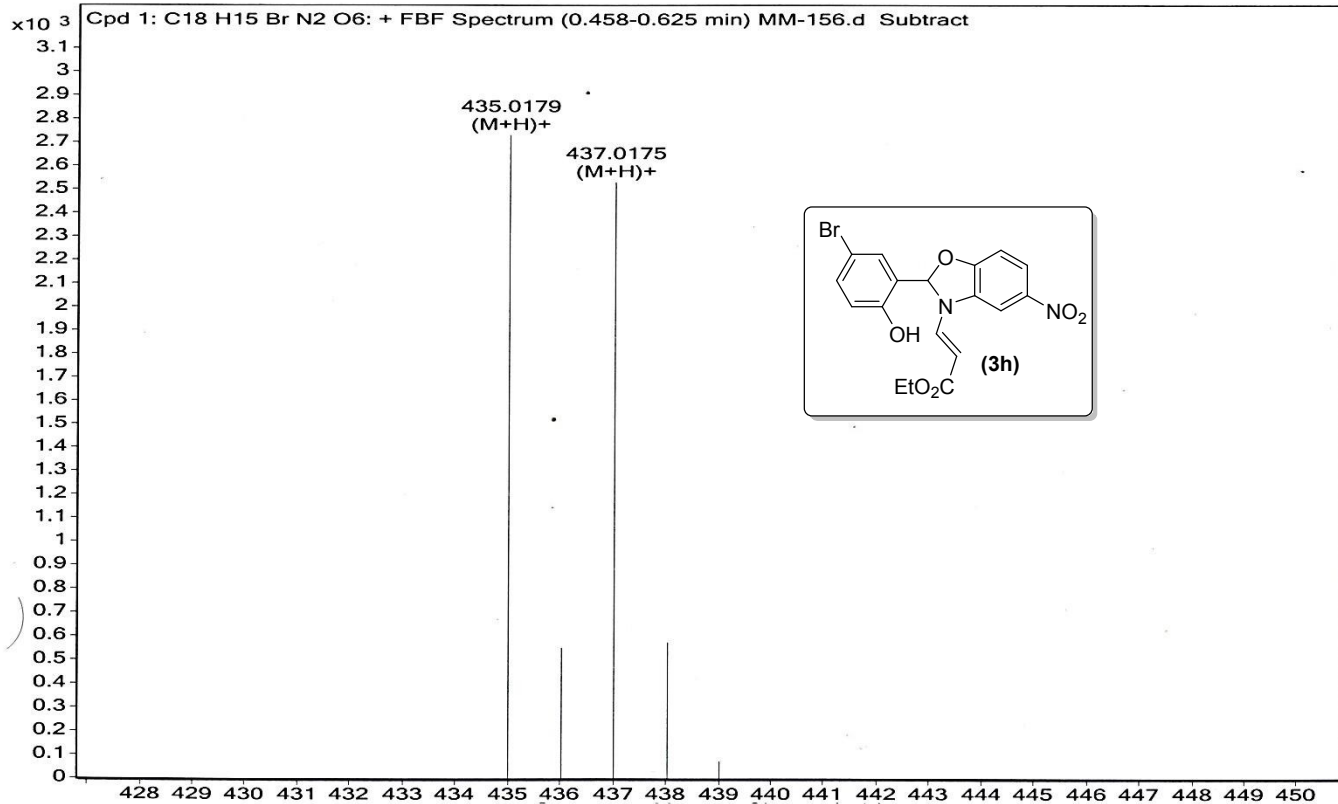

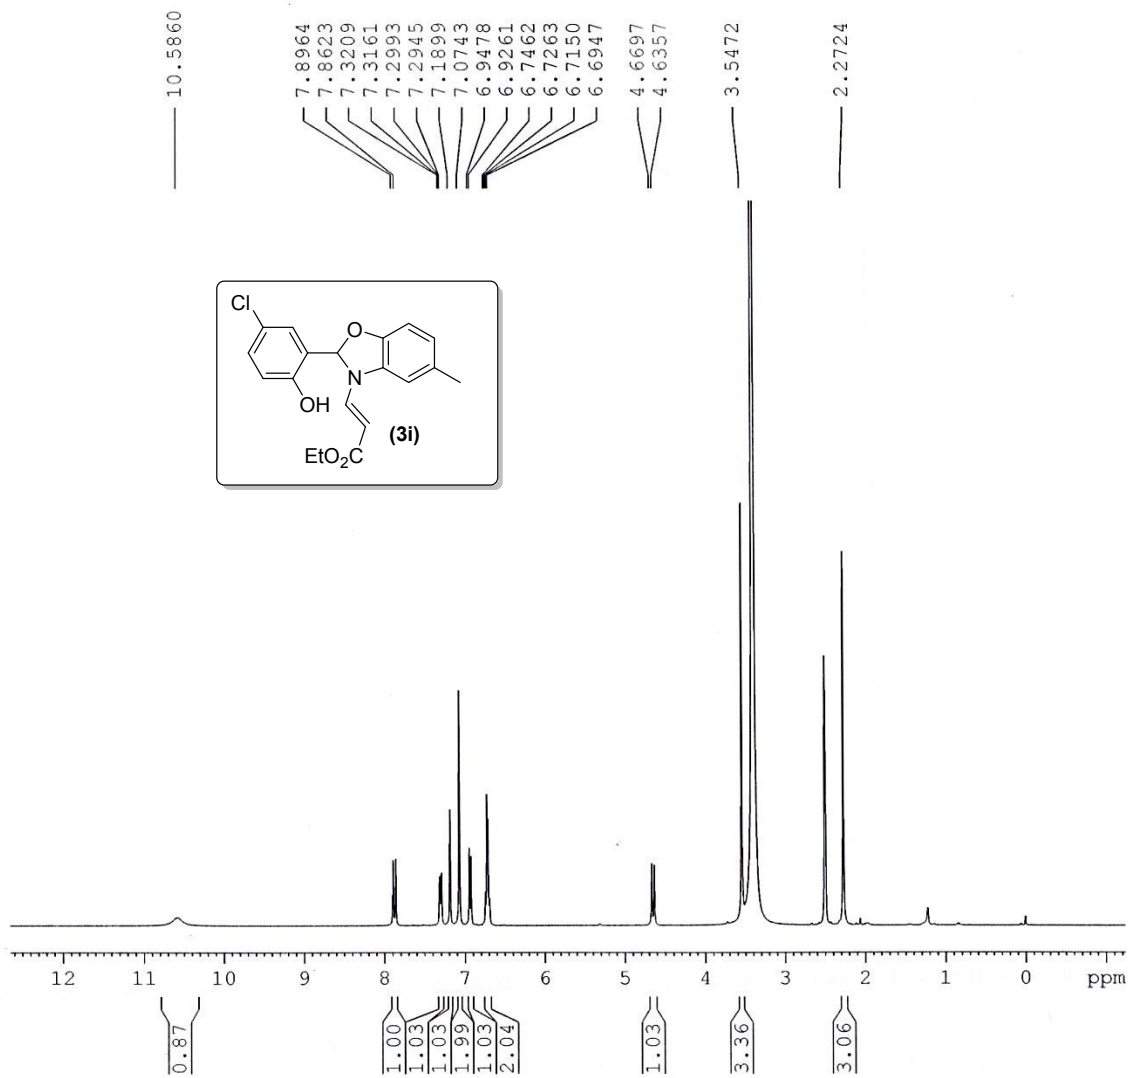

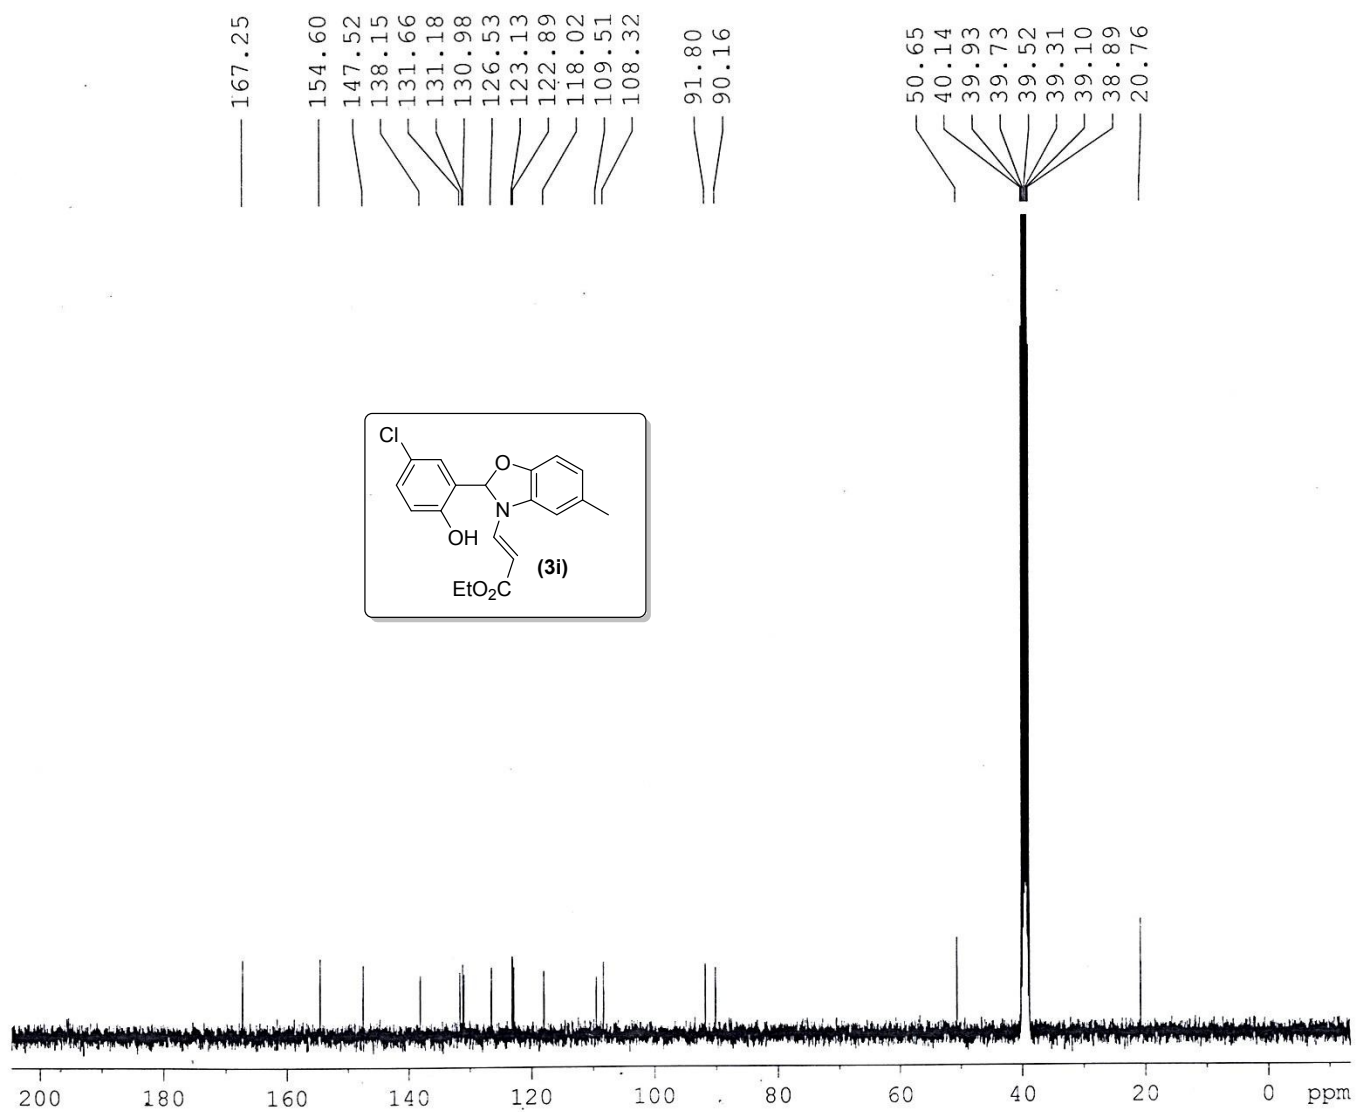

|               |          |             |                      |                 |        |                        |               |
|---------------|----------|-------------|----------------------|-----------------|--------|------------------------|---------------|
| Sample Name   | MM-162   | Position    |                      | Instrument Name | Q-TOF  | User Name              | QTOF-PU\admin |
| Inj Vol       | -1       | InjPosition |                      | SampleType      | Sample | IRM Calibration Status | Success       |
| Data Filename | MM-162.d | ACQ Method  | Pondicherry Universi |                 |        |                        |               |

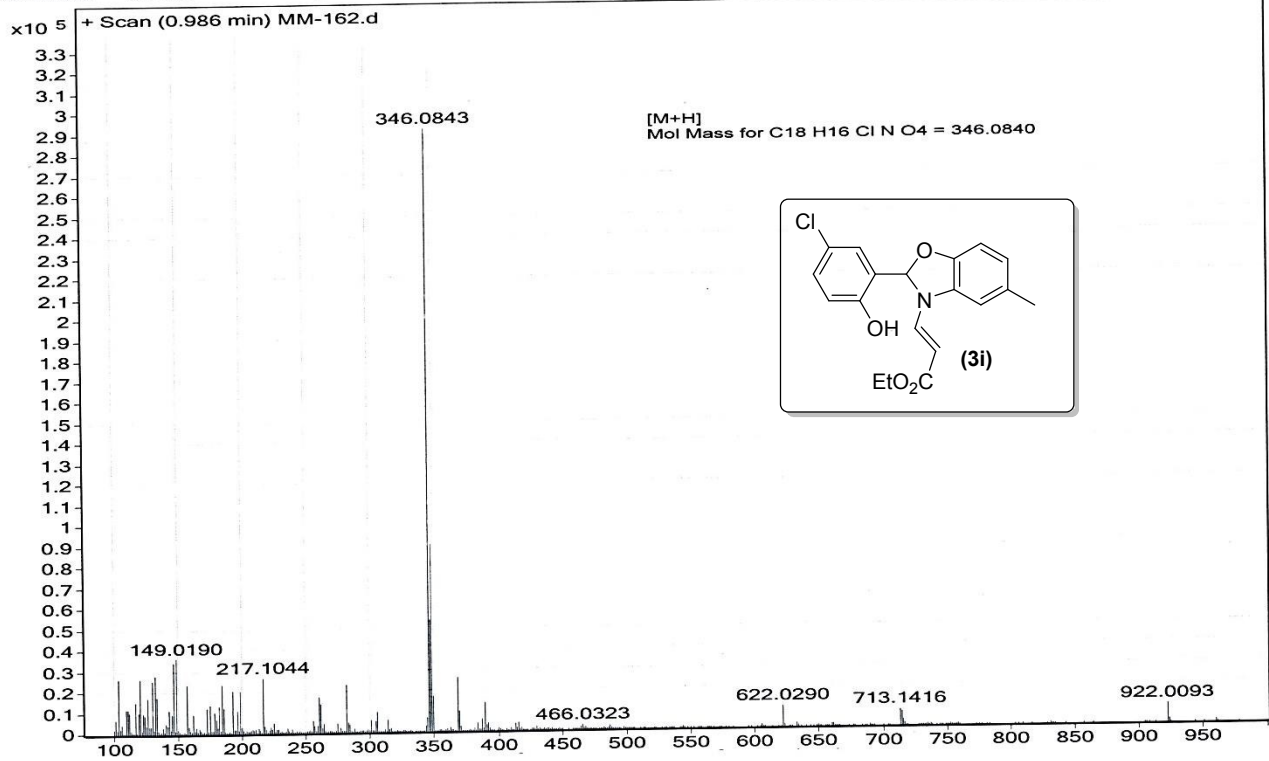

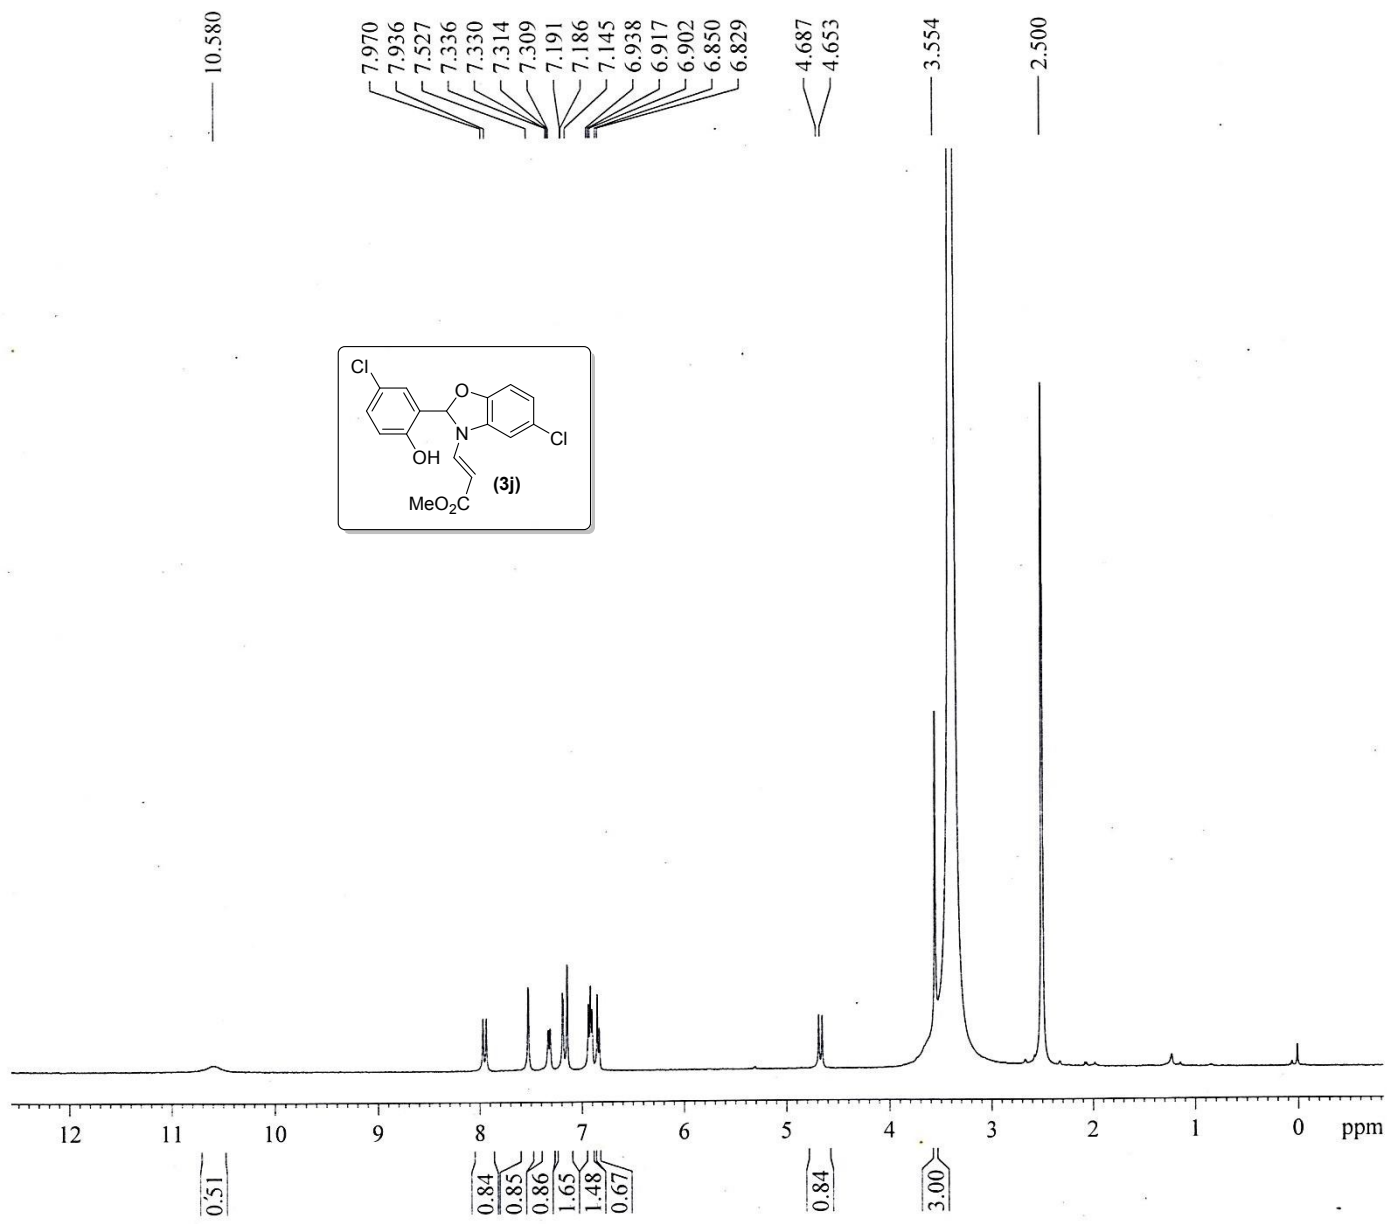



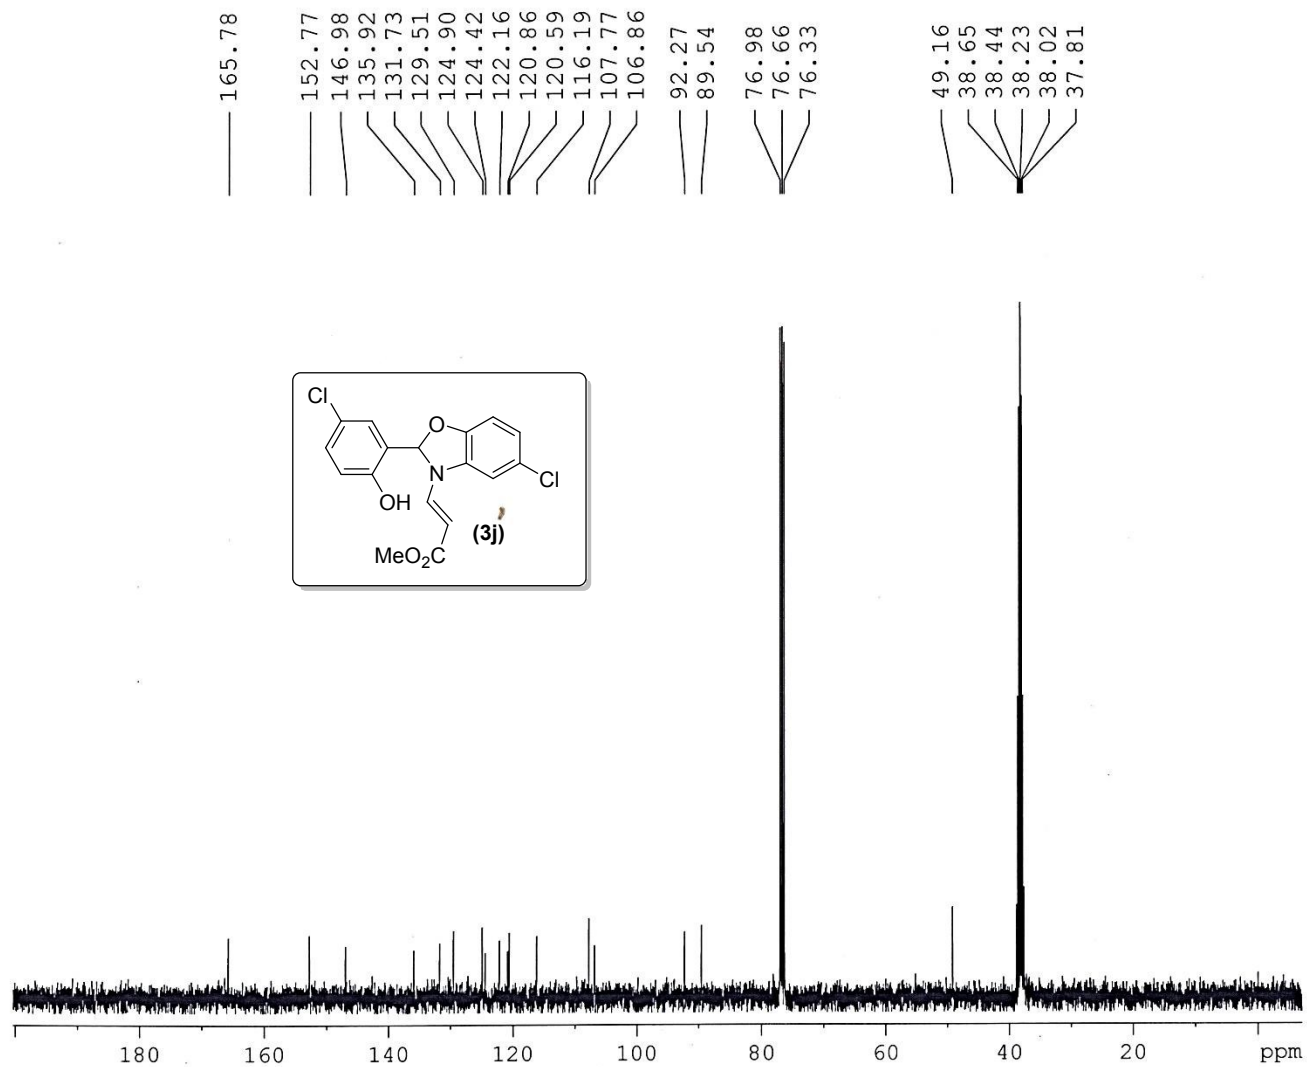

Sample Name MM-161      Position      Instrument Name Q-TOF      User Name QTOF-PU\admin  
Inj Vol -1      InjPosition      SampleType      Sample      IRM Calibration Status Success  
Data Filename MM-161.d      ACQ Method      Pondicherry Universi

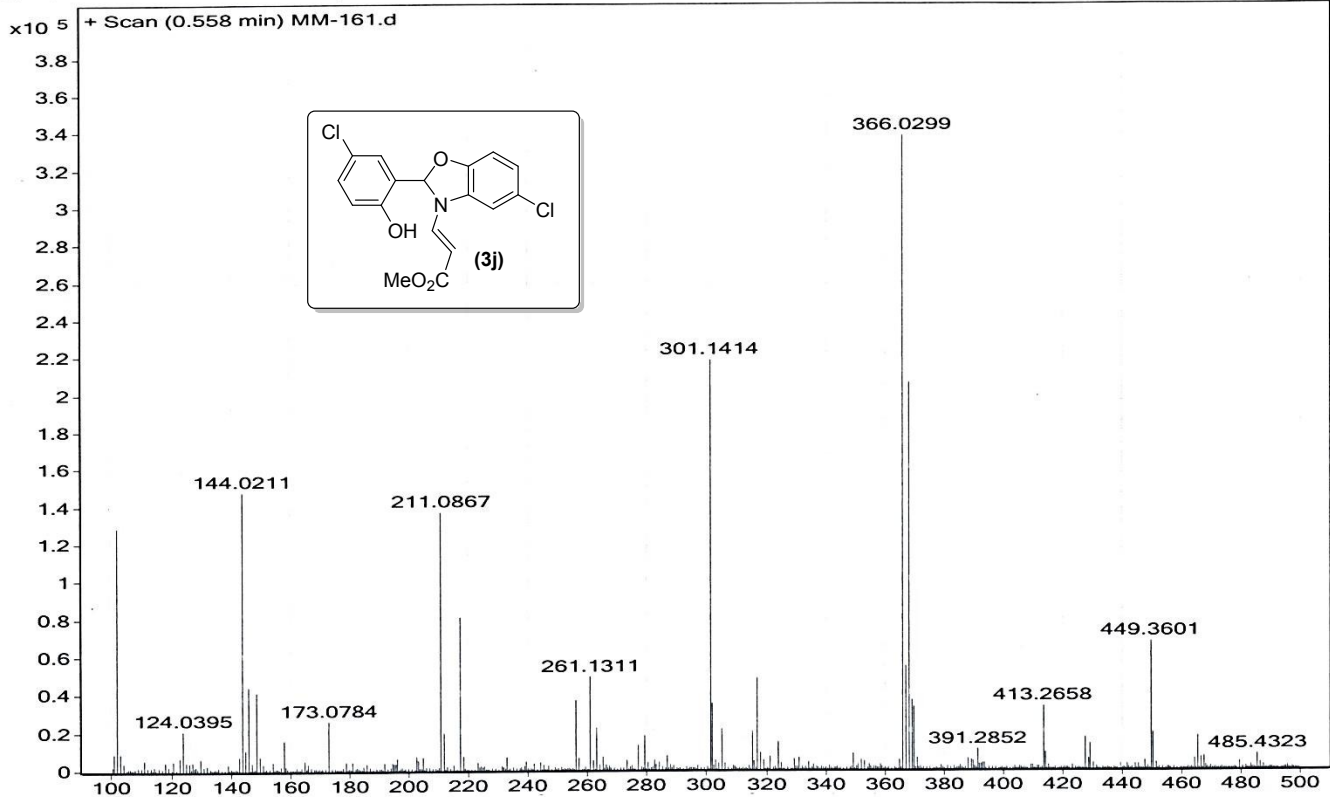

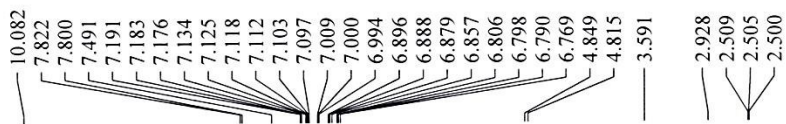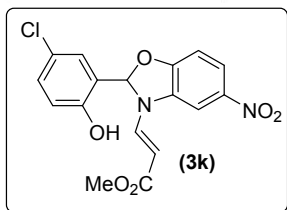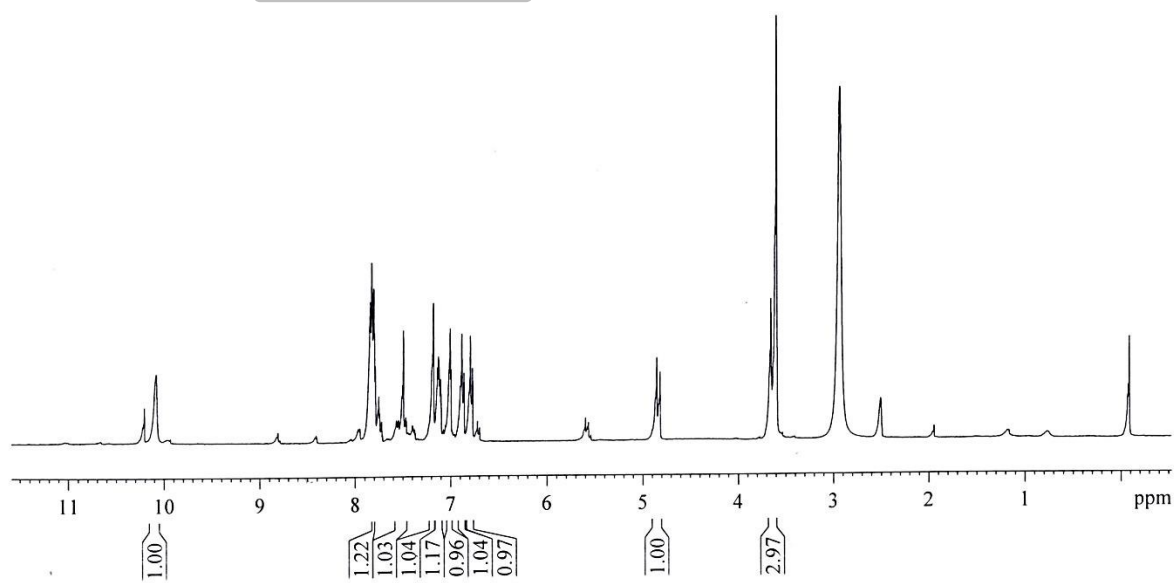

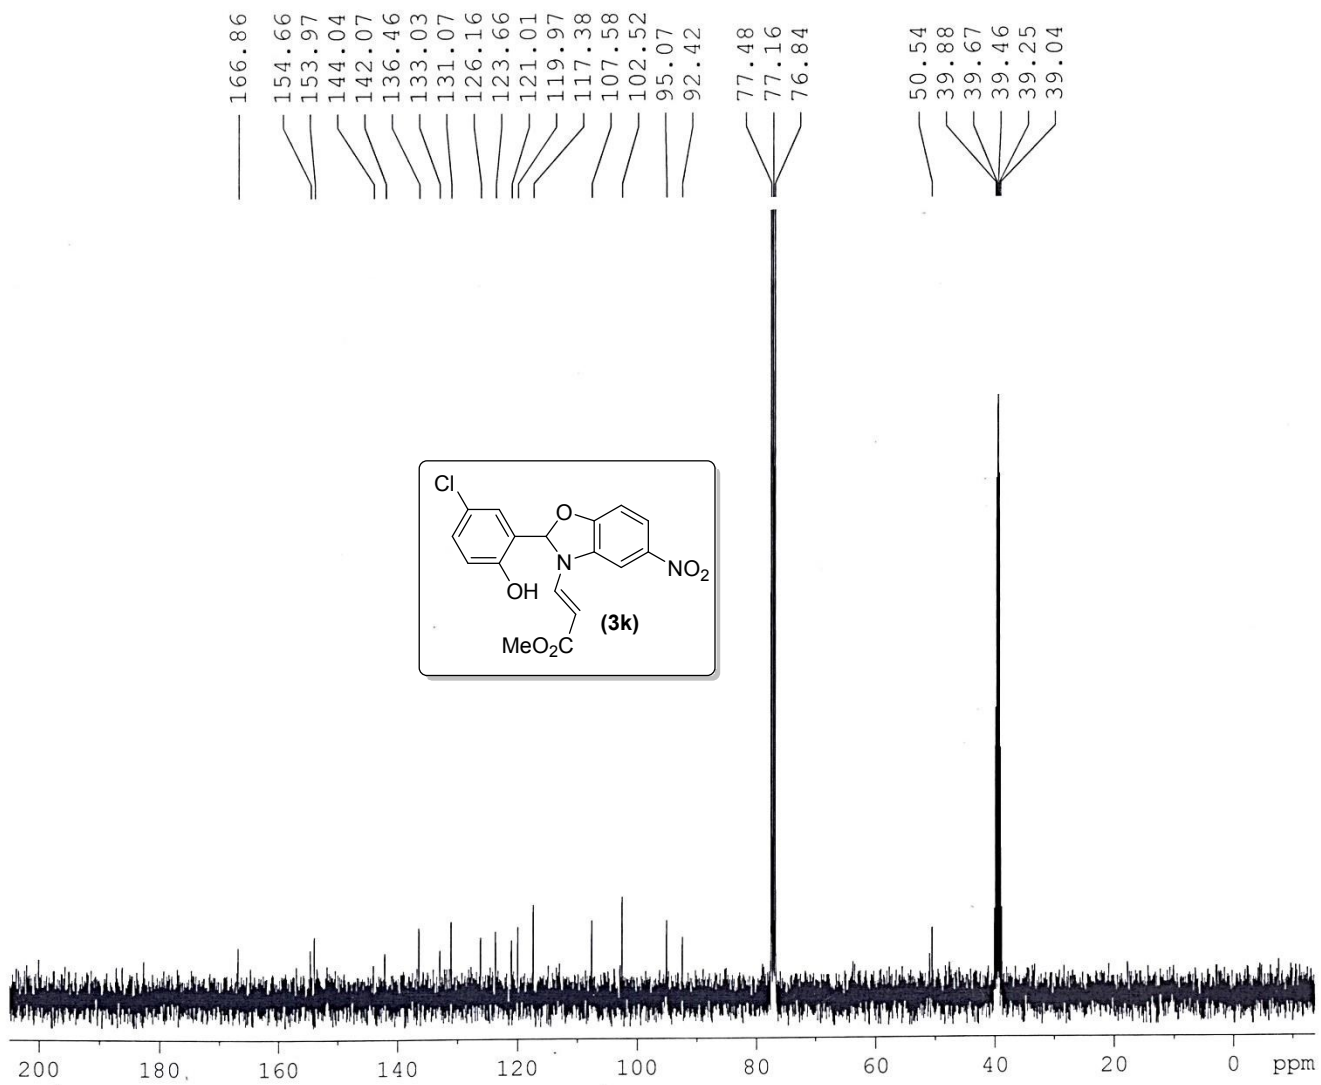

|               |          |             |                      |                 |        |                        |               |
|---------------|----------|-------------|----------------------|-----------------|--------|------------------------|---------------|
| Sample Name   | MM-164   | Position    |                      | Instrument Name | Q-TOF  | User Name              | QTOF-PU\admin |
| Inj Vol       | -1       | InjPosition |                      | SampleType      | Sample | IRM Calibration Status | Success       |
| Data Filename | MM-164.d | ACQ Method  | Pondicherry Universi |                 |        |                        |               |

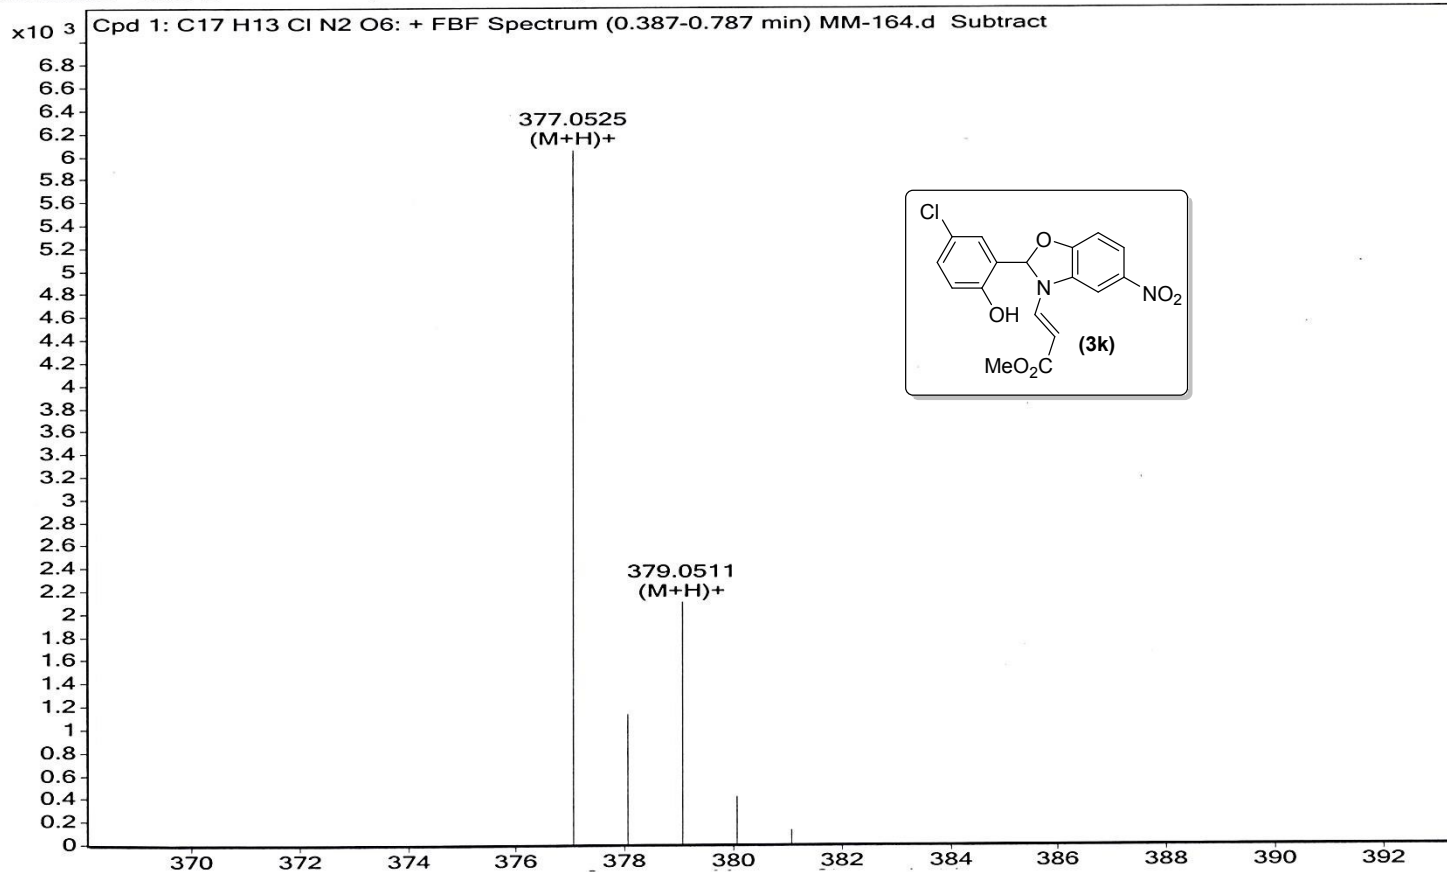

PROTON DMSO {D:\MB} KOPAL 1

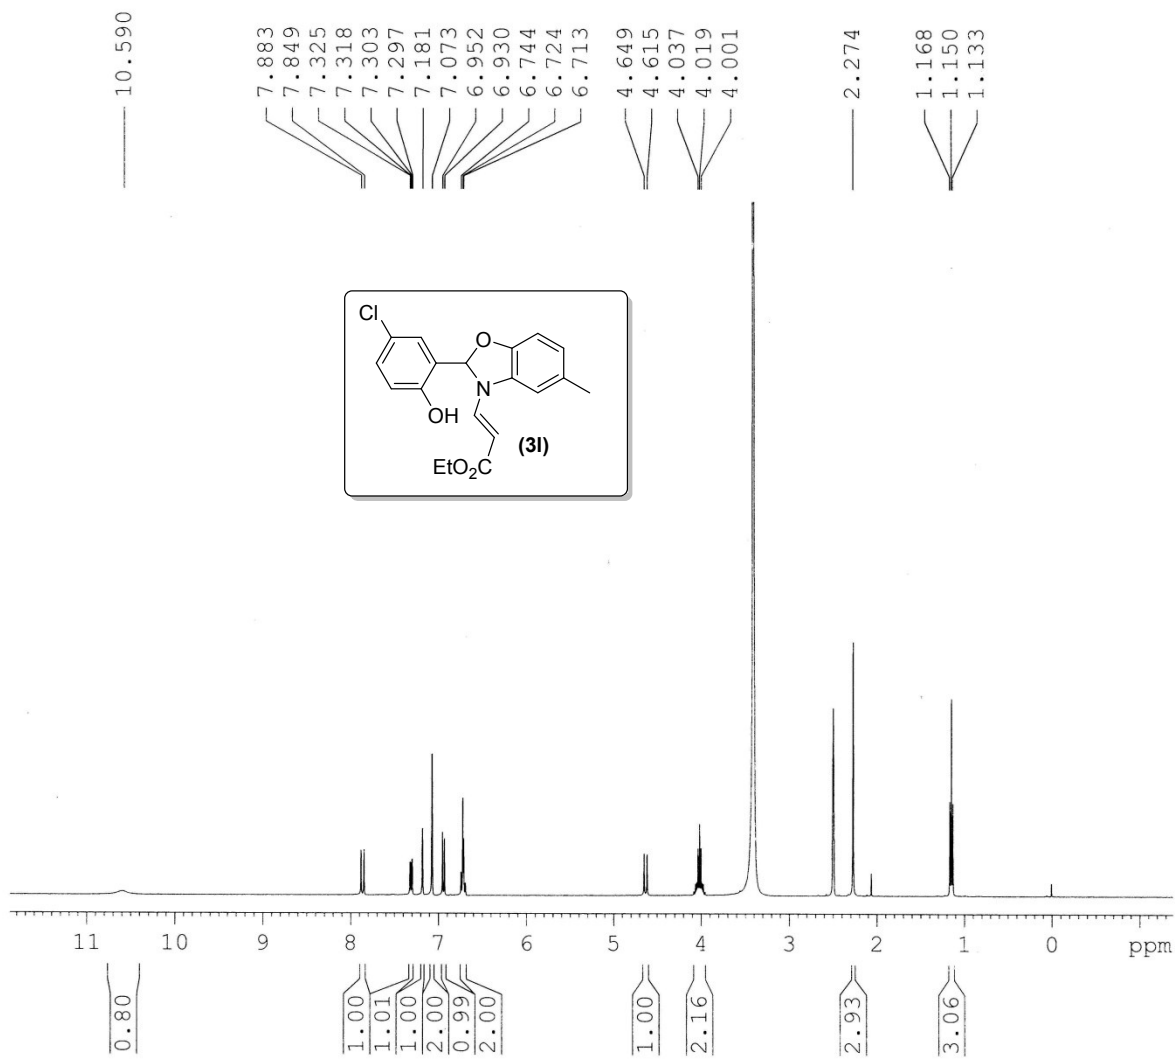

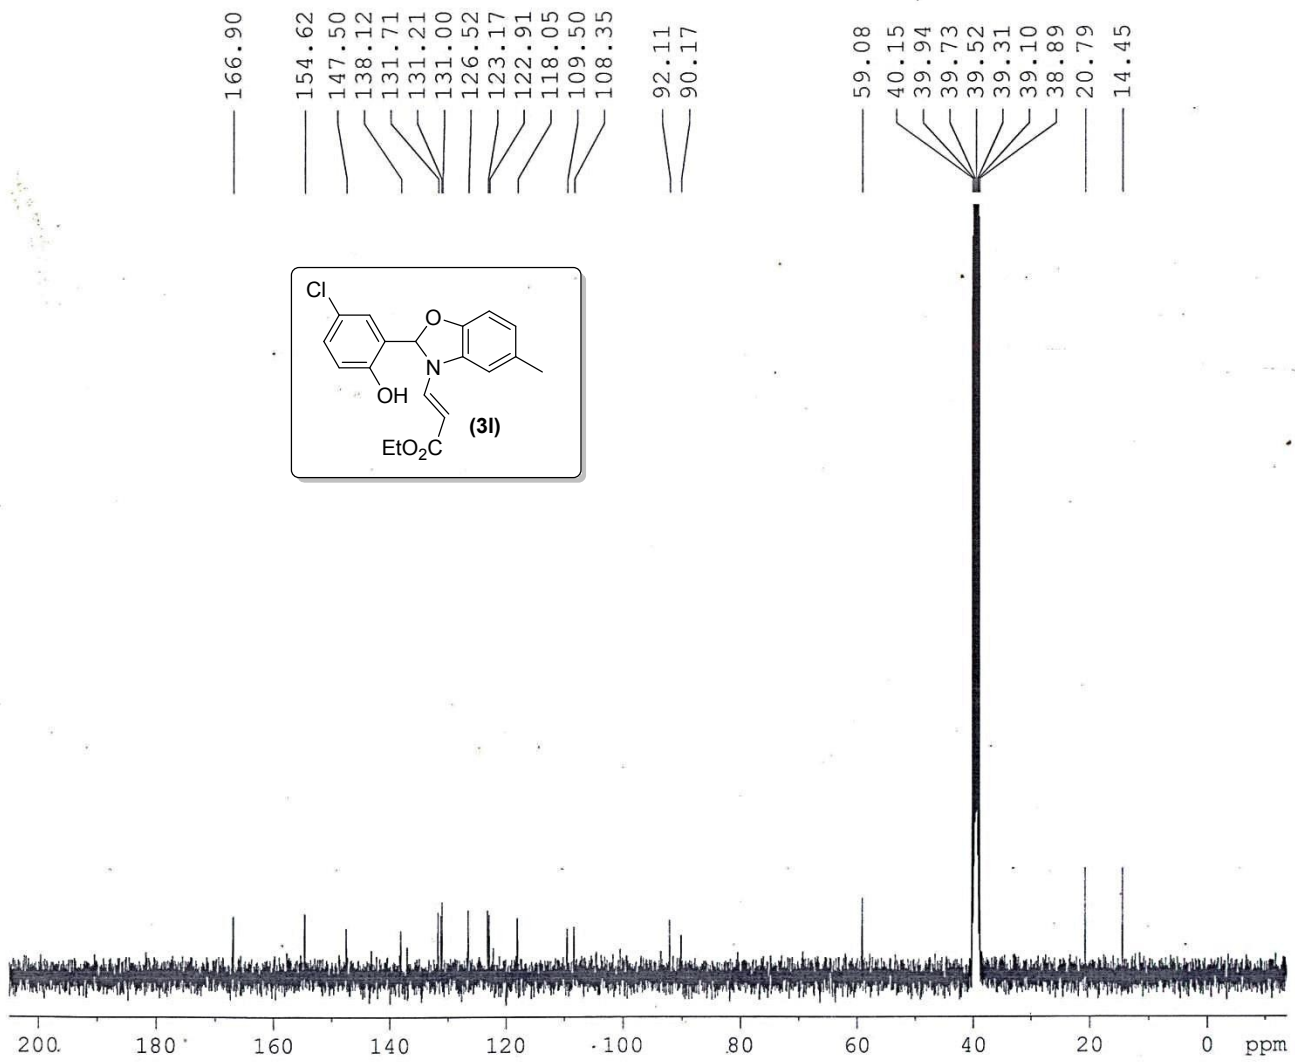

Sample Name MM-170  
Inj Vol -1  
Data Filename MM-170.d

Position  
InjPosition  
ACQ Method Pondicherry Universi

Instrument Name Q-TOF  
SampleType Sample

User Name  
IRM Calibration Status

QTOF-PU\admin  
Success

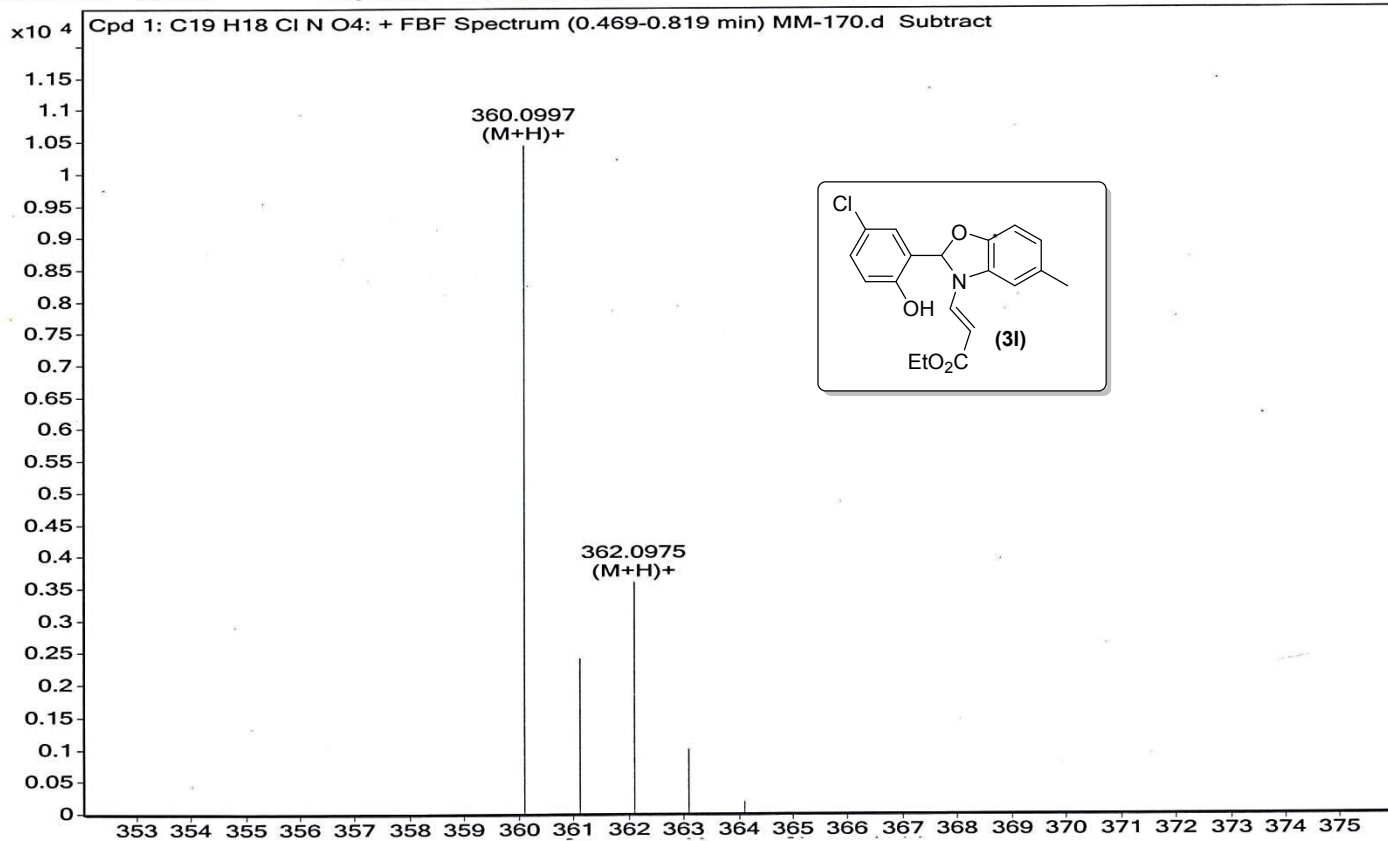



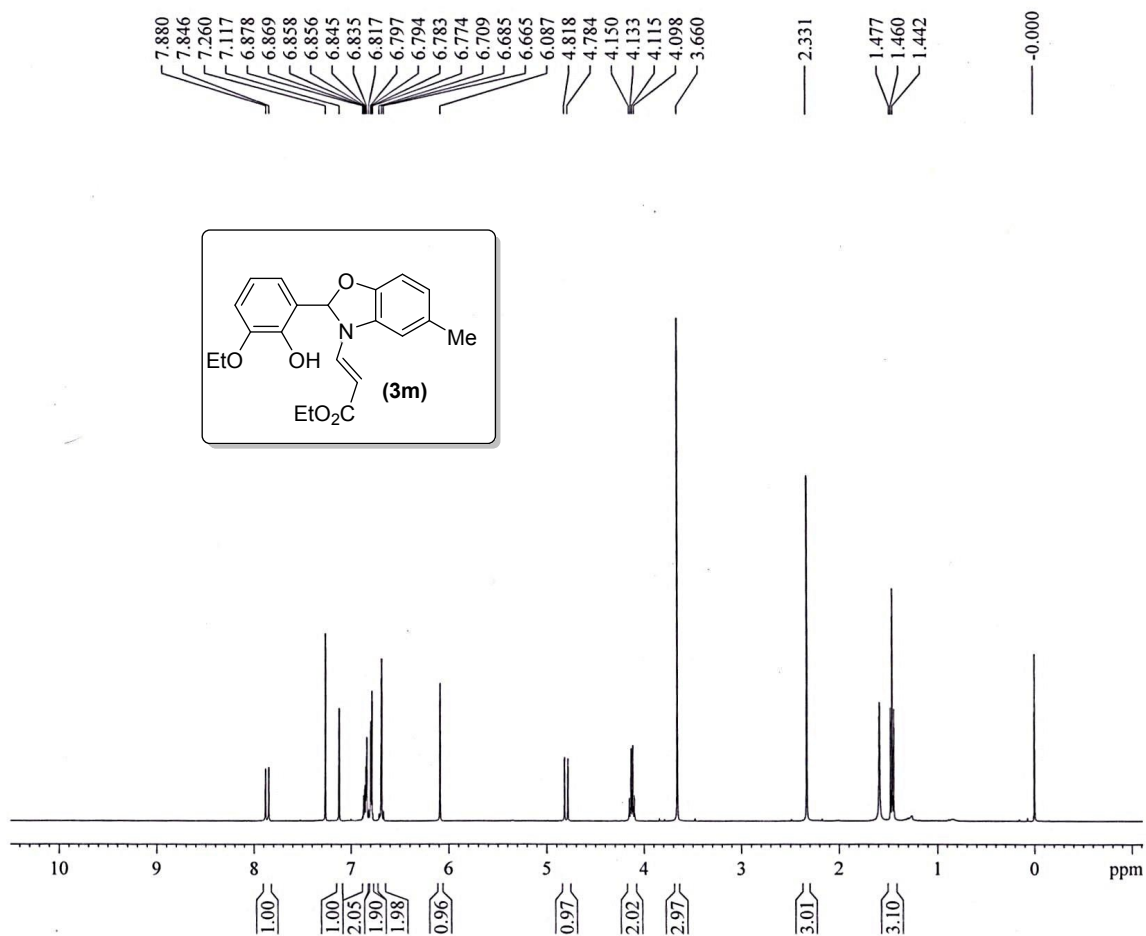

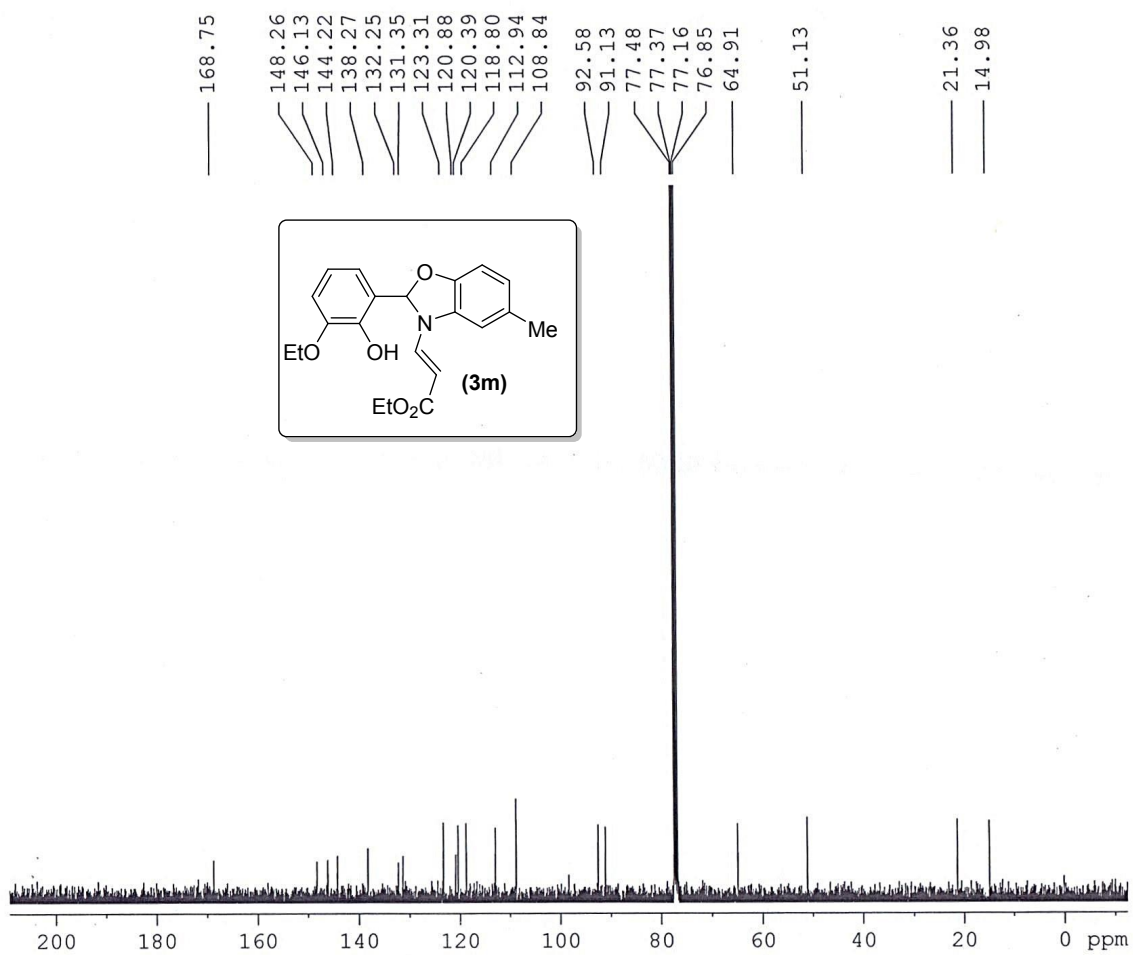

Sample Name MM-150      Position      Instrument Name Q-TOF      User Name      QTOF-PU\admin  
Inj Vol -1      InjPosition      SampleType      Sample      IRM Calibration Status      Success  
Data Filename MM-150a.d      ACQ Method      Pondicherry Universi

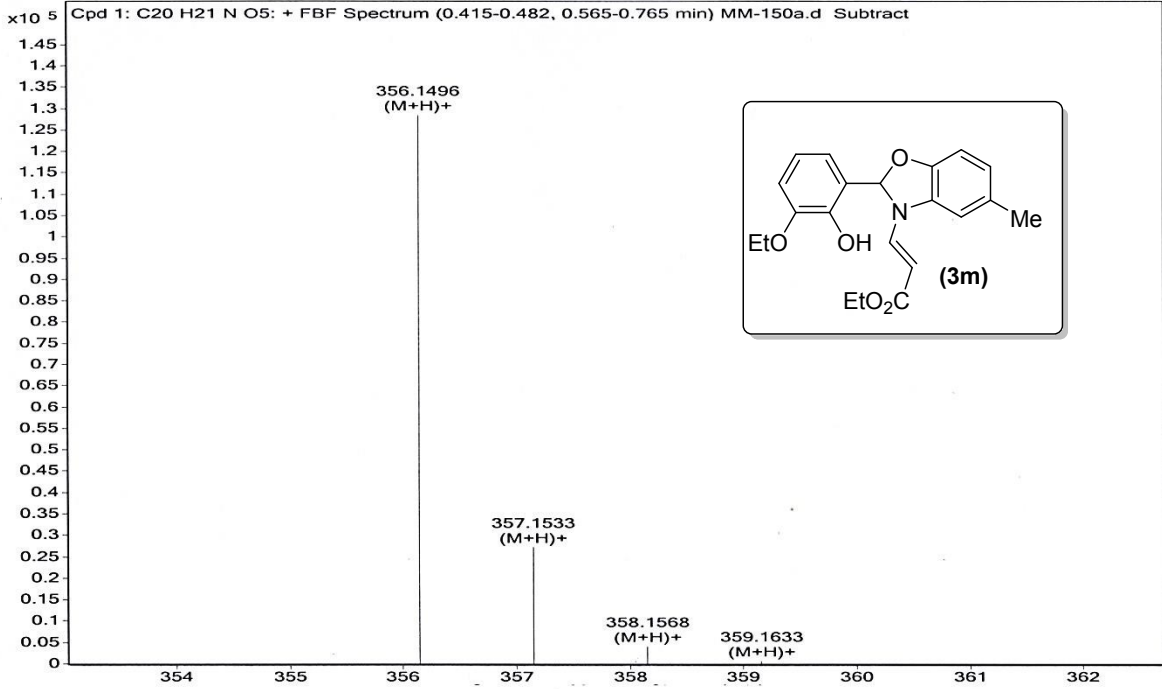

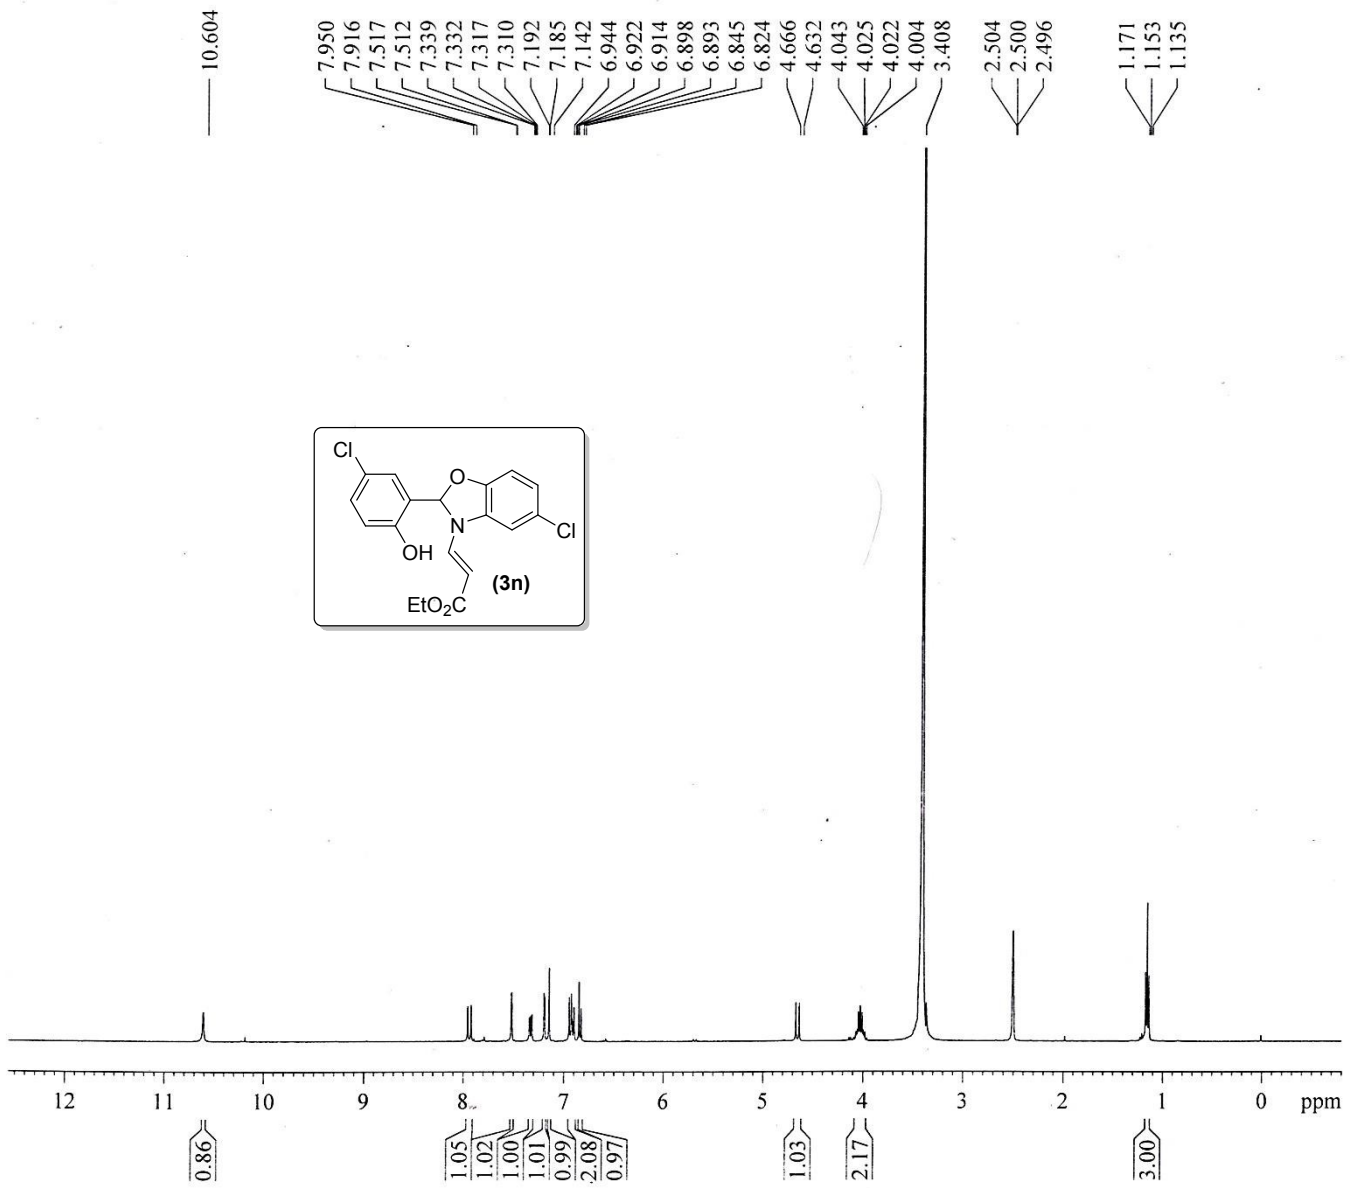

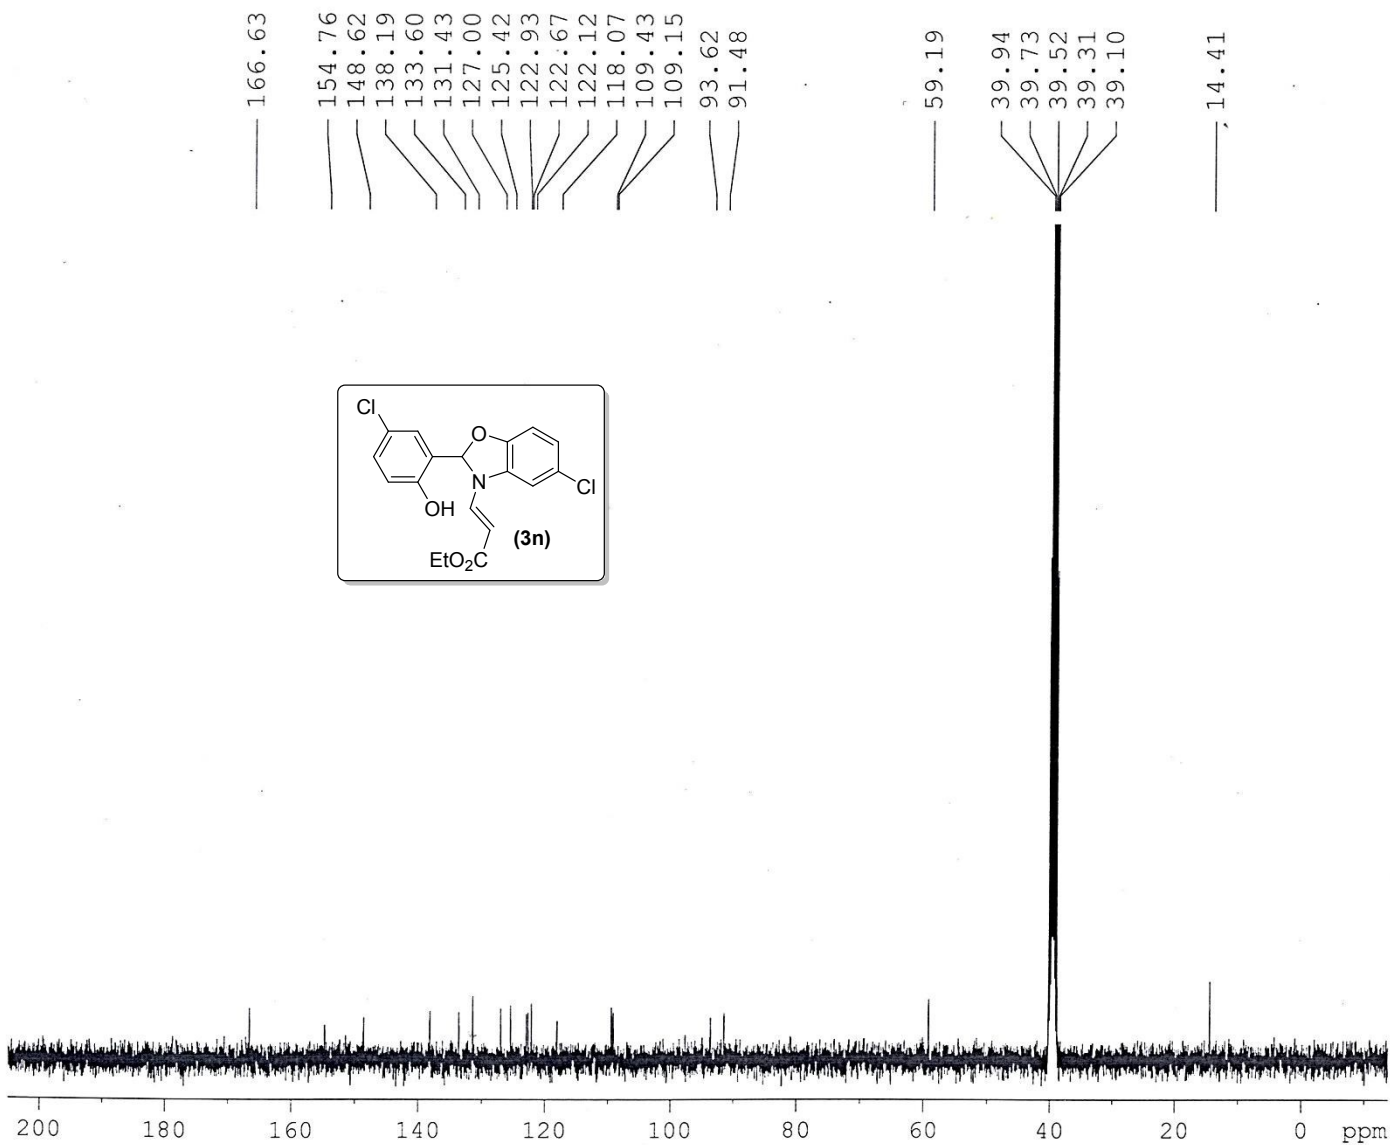

Sample Name MM-169  
Inj Vol -1  
Data Filename MM-169.d

Position  
InjPosition  
ACQ Method Pondicherry Universi

Instrument Name Q-TOF  
SampleType Sample

User Name  
IRM Calibration Status

QTOF-PU\admin  
Success

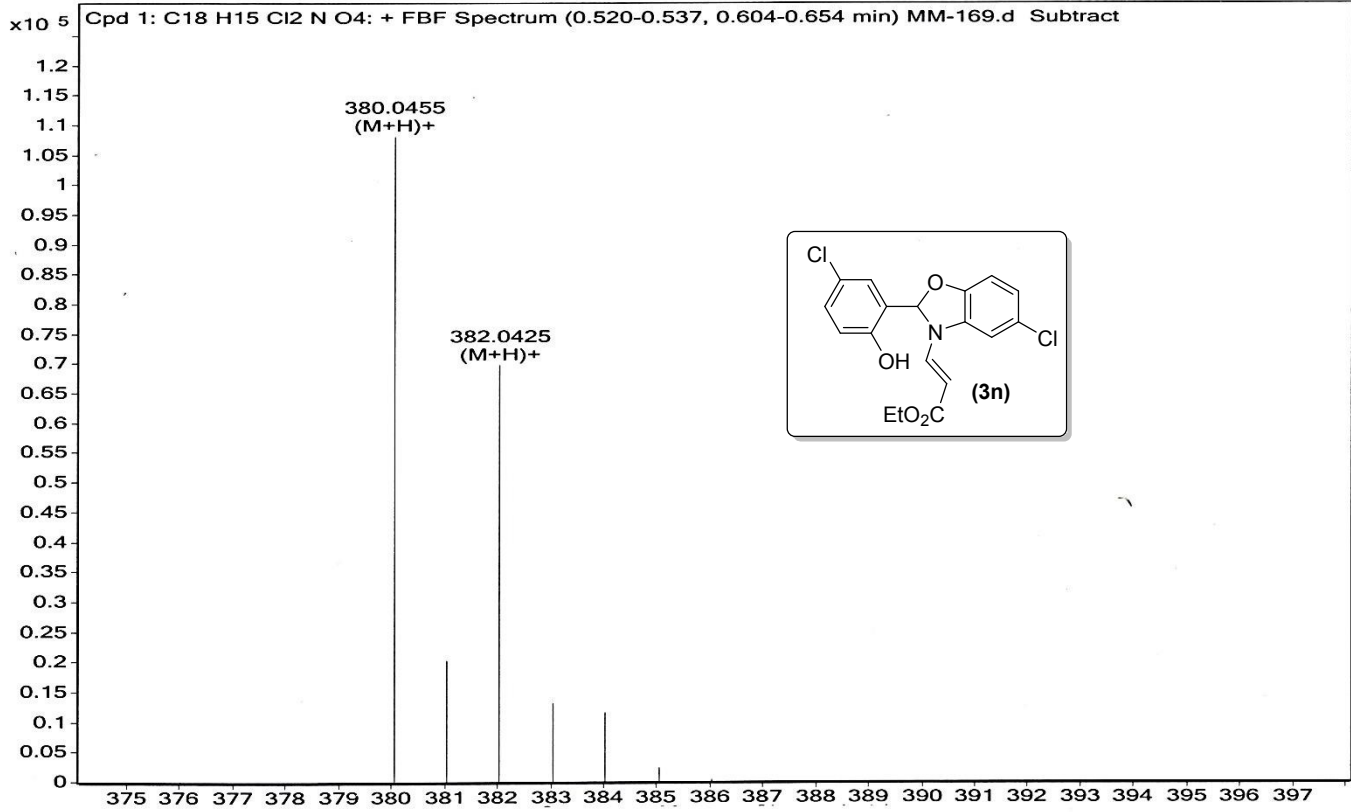

PROTON DMSO {D:\MB} KOPAL 1

10.207  
7.882  
7.847  
7.717  
7.680  
7.313  
7.307  
7.291  
7.285  
7.170  
7.165  
7.105  
7.092  
7.078  
7.064  
6.948  
6.934  
6.930  
6.920  
6.915  
6.898  
6.893  
6.805  
6.788  
6.784  
4.806  
4.772  
3.641

-0.000

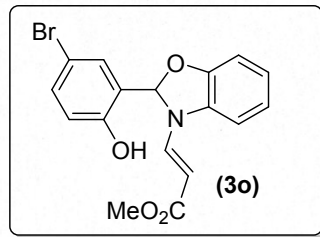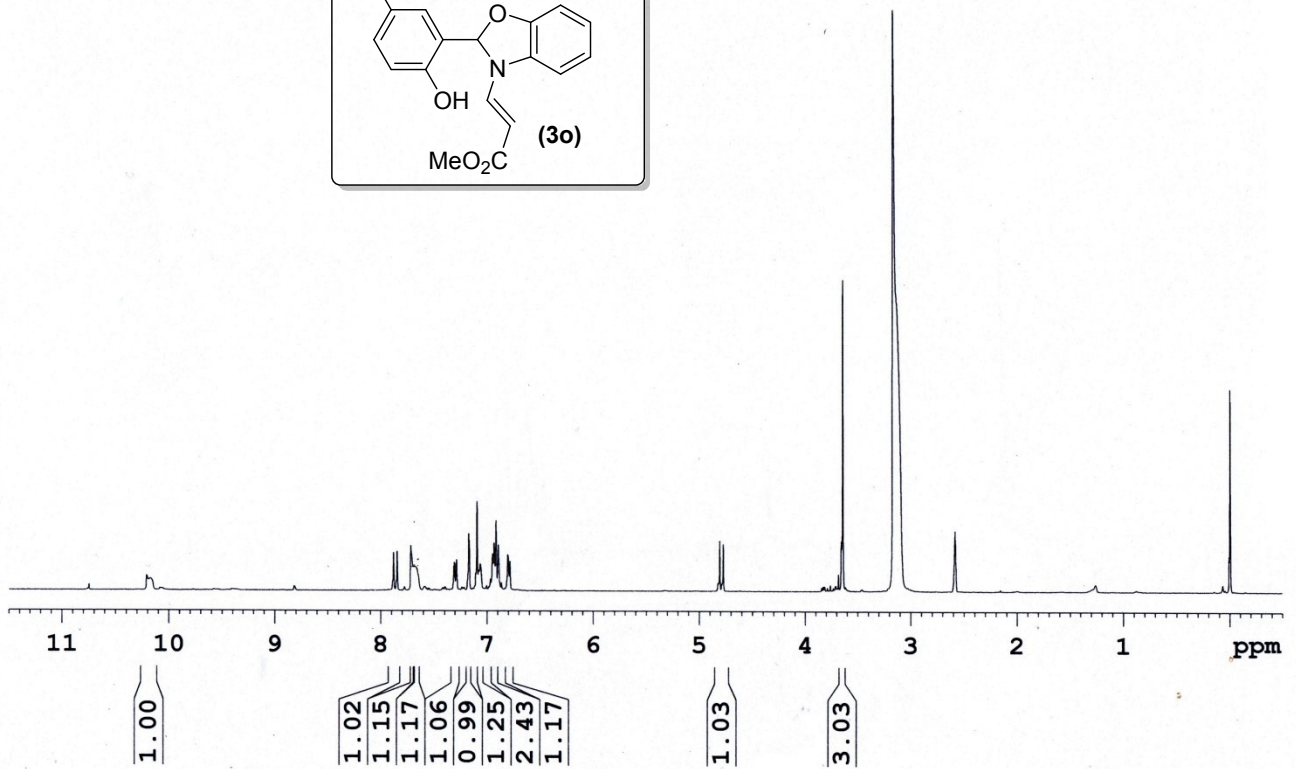

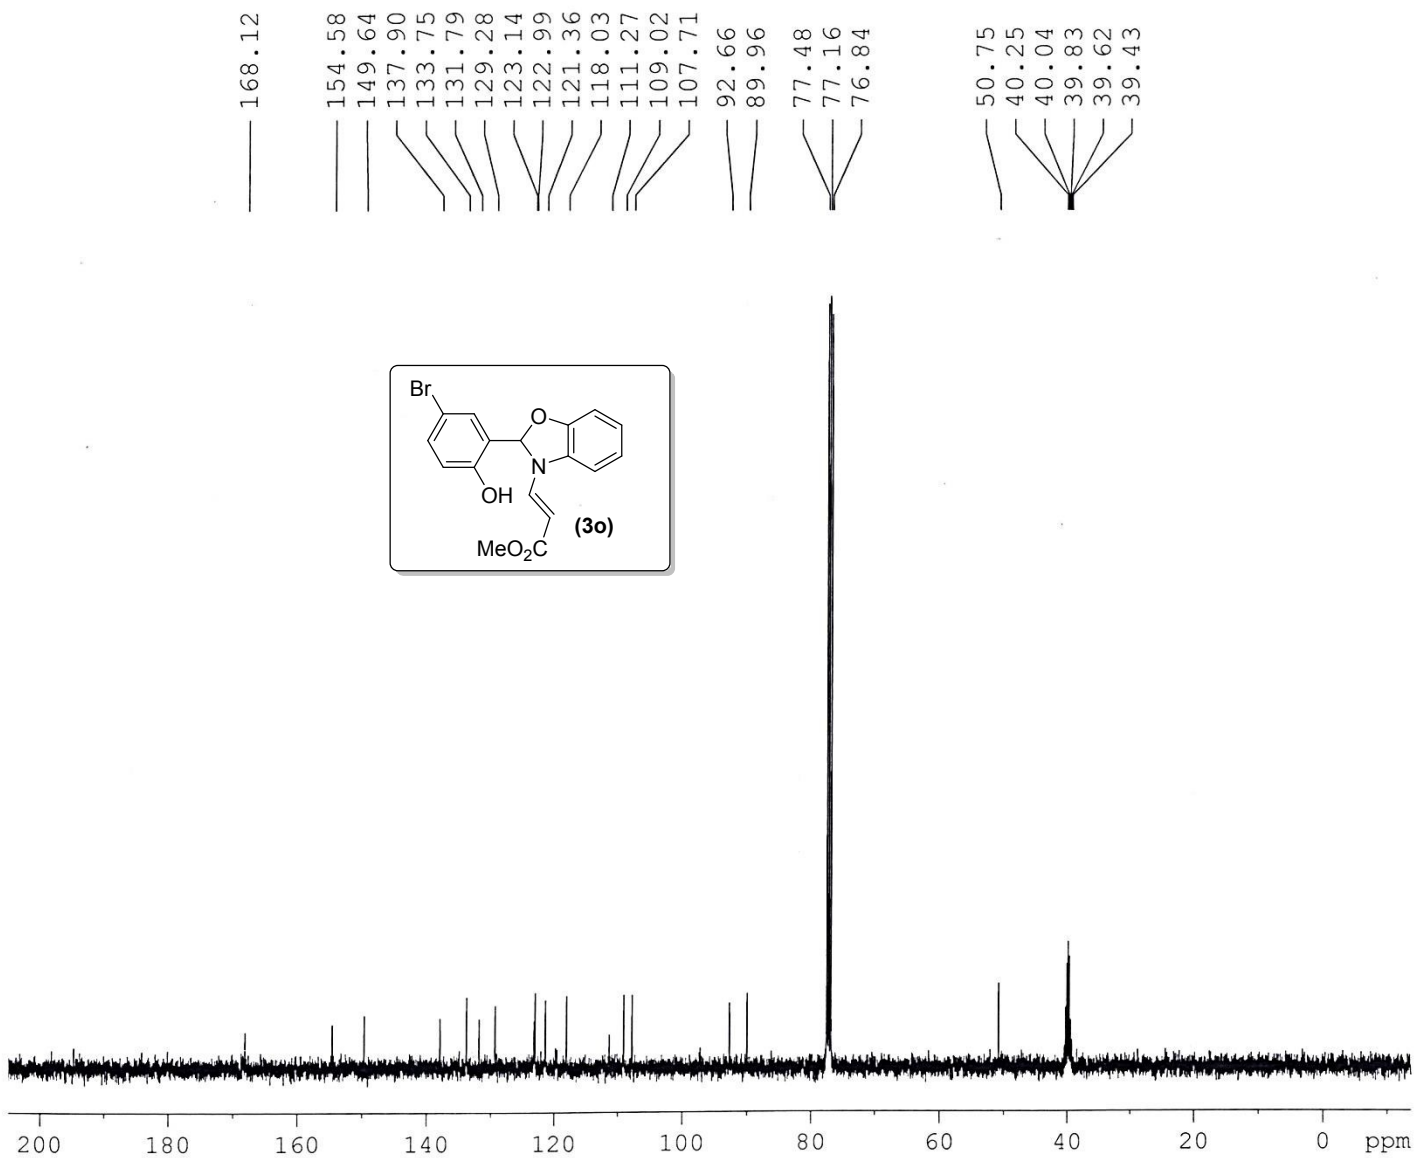



Sample Name MM-117 Position InjPosition Instrument Name Q-TOF User Name QTOF-PU\admin  
Inj Vol -1 InjPosition SampleType Sample IRM Calibration Status Success  
Data Filename MM-117.d ACQ Method Pondicherry Universi

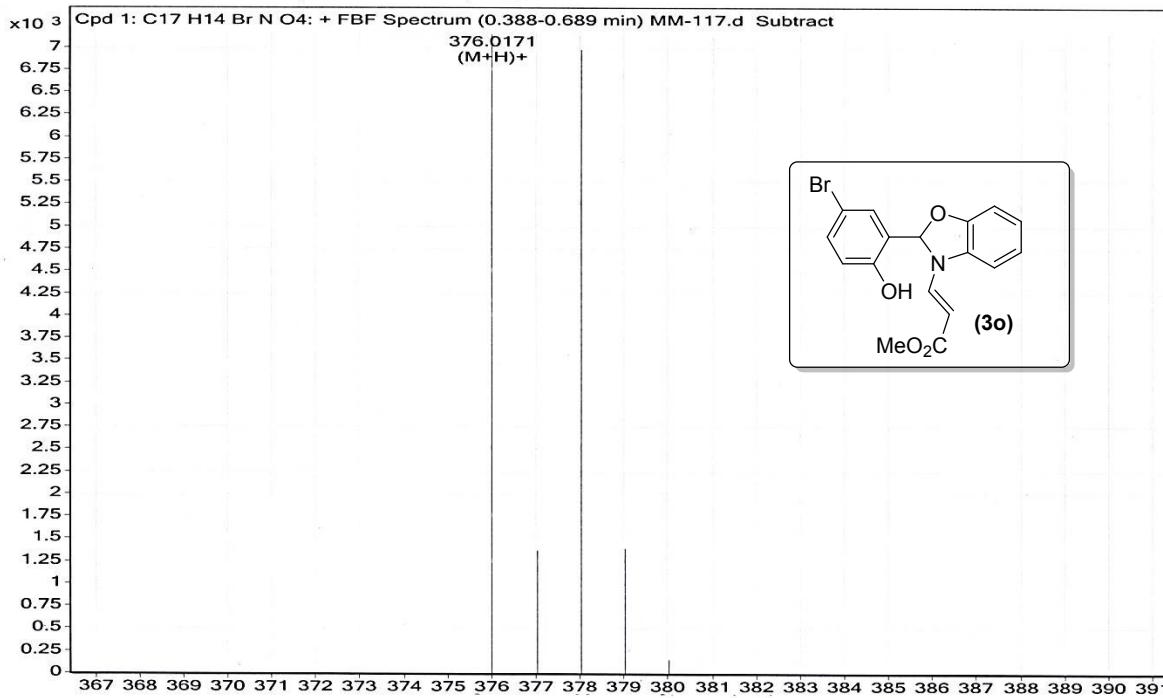

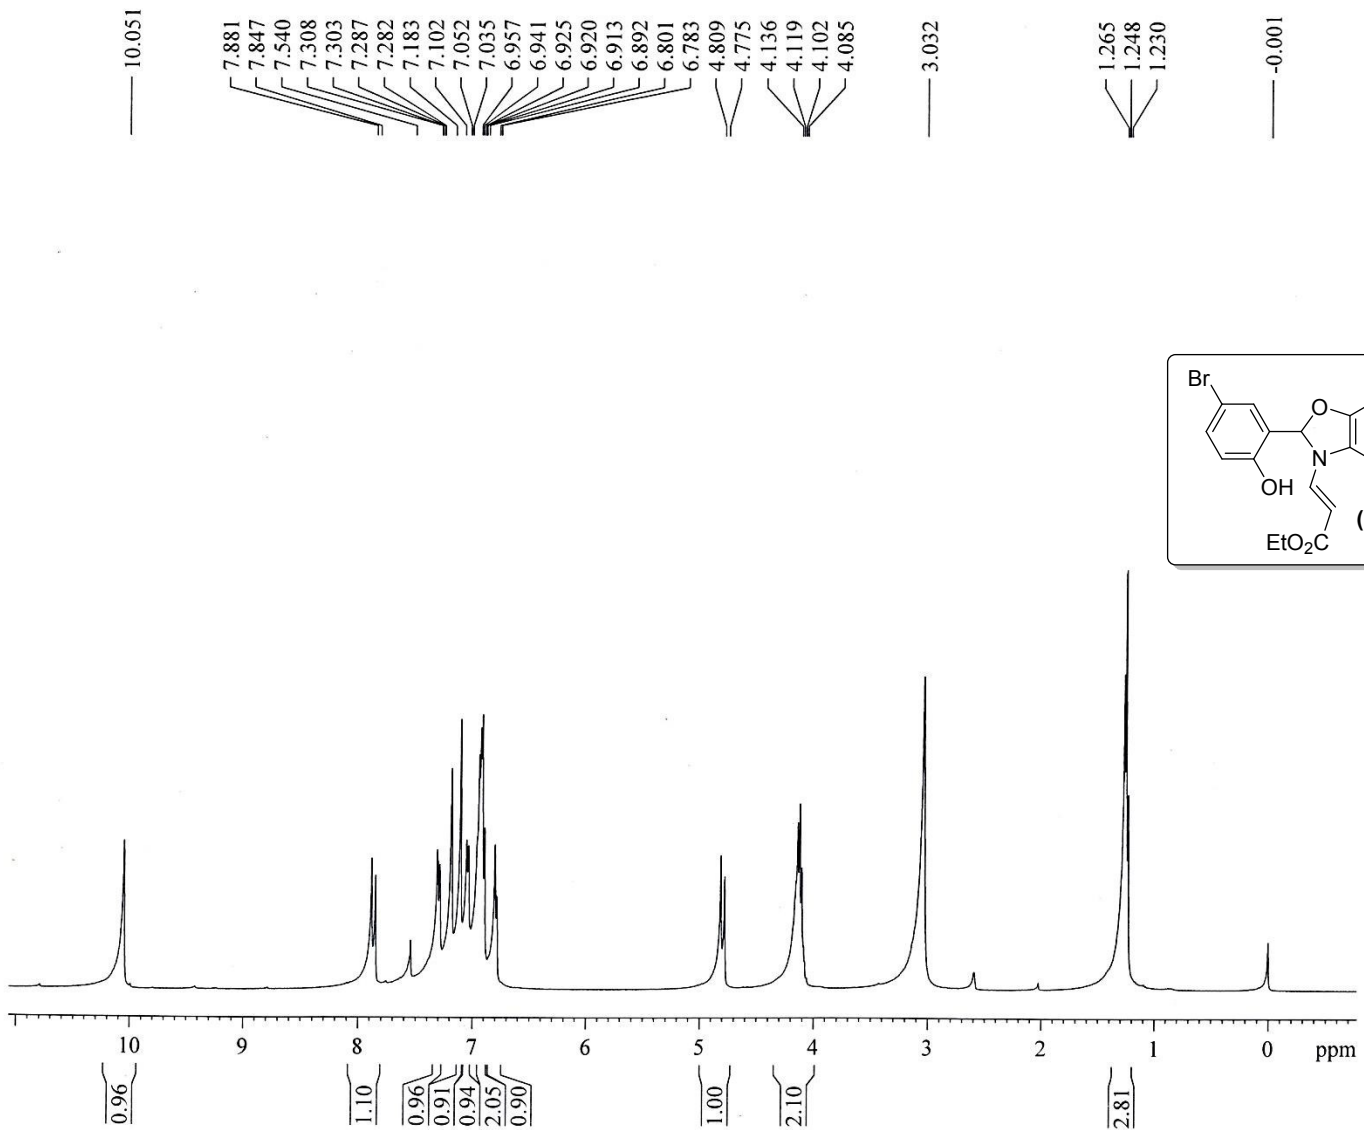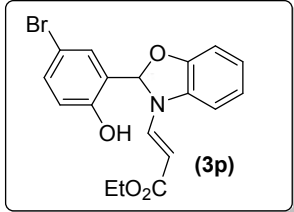

— 167.24  
 — 154.32  
 — 149.21  
 — 137.43  
 — 133.36  
 — 131.47  
 — 128.84  
 — 122.89  
 — 122.59  
 — 121.03  
 — 117.73  
 — 110.76  
 — 108.59  
 — 107.40  
 — 92.68  
 — 89.59  
 — 77.48  
 — 77.16  
 — 76.84  
 — 58.99  
 — 39.89  
 — 39.68  
 — 39.47  
 — 39.26  
 — 39.06  
 — 13.93

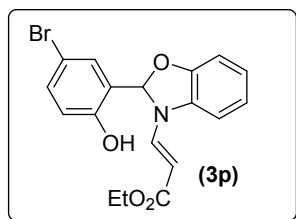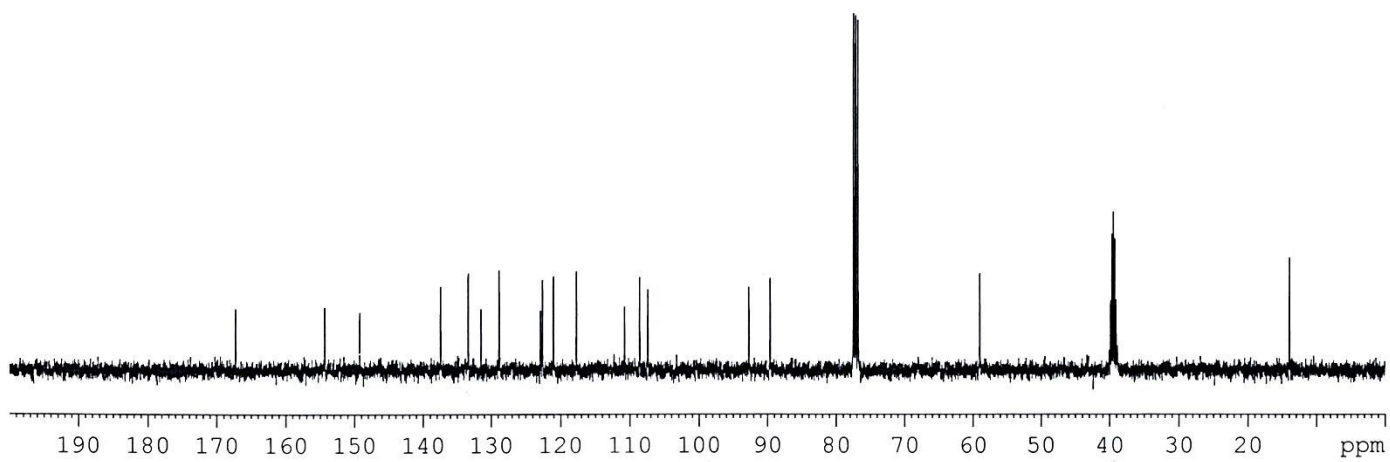

Sample Name MM-104  
Inj Vol -1  
Data Filename MM-104.d

Position  
InjPosition  
ACQ Method Pondicherry Universi

Instrument Name Q-TOF  
SampleType Sample

User Name  
IRM Calibration Status

QTOF-PU\admin  
Success

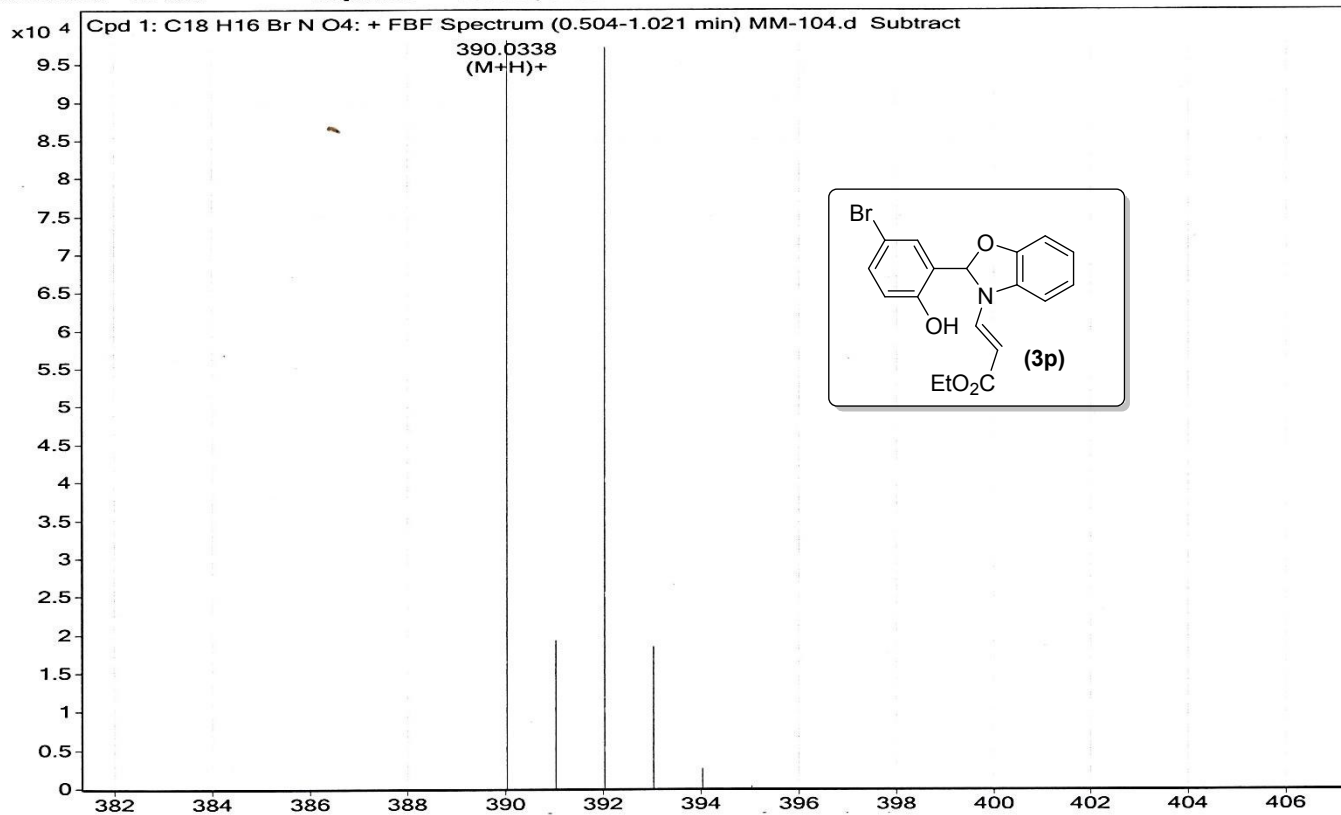

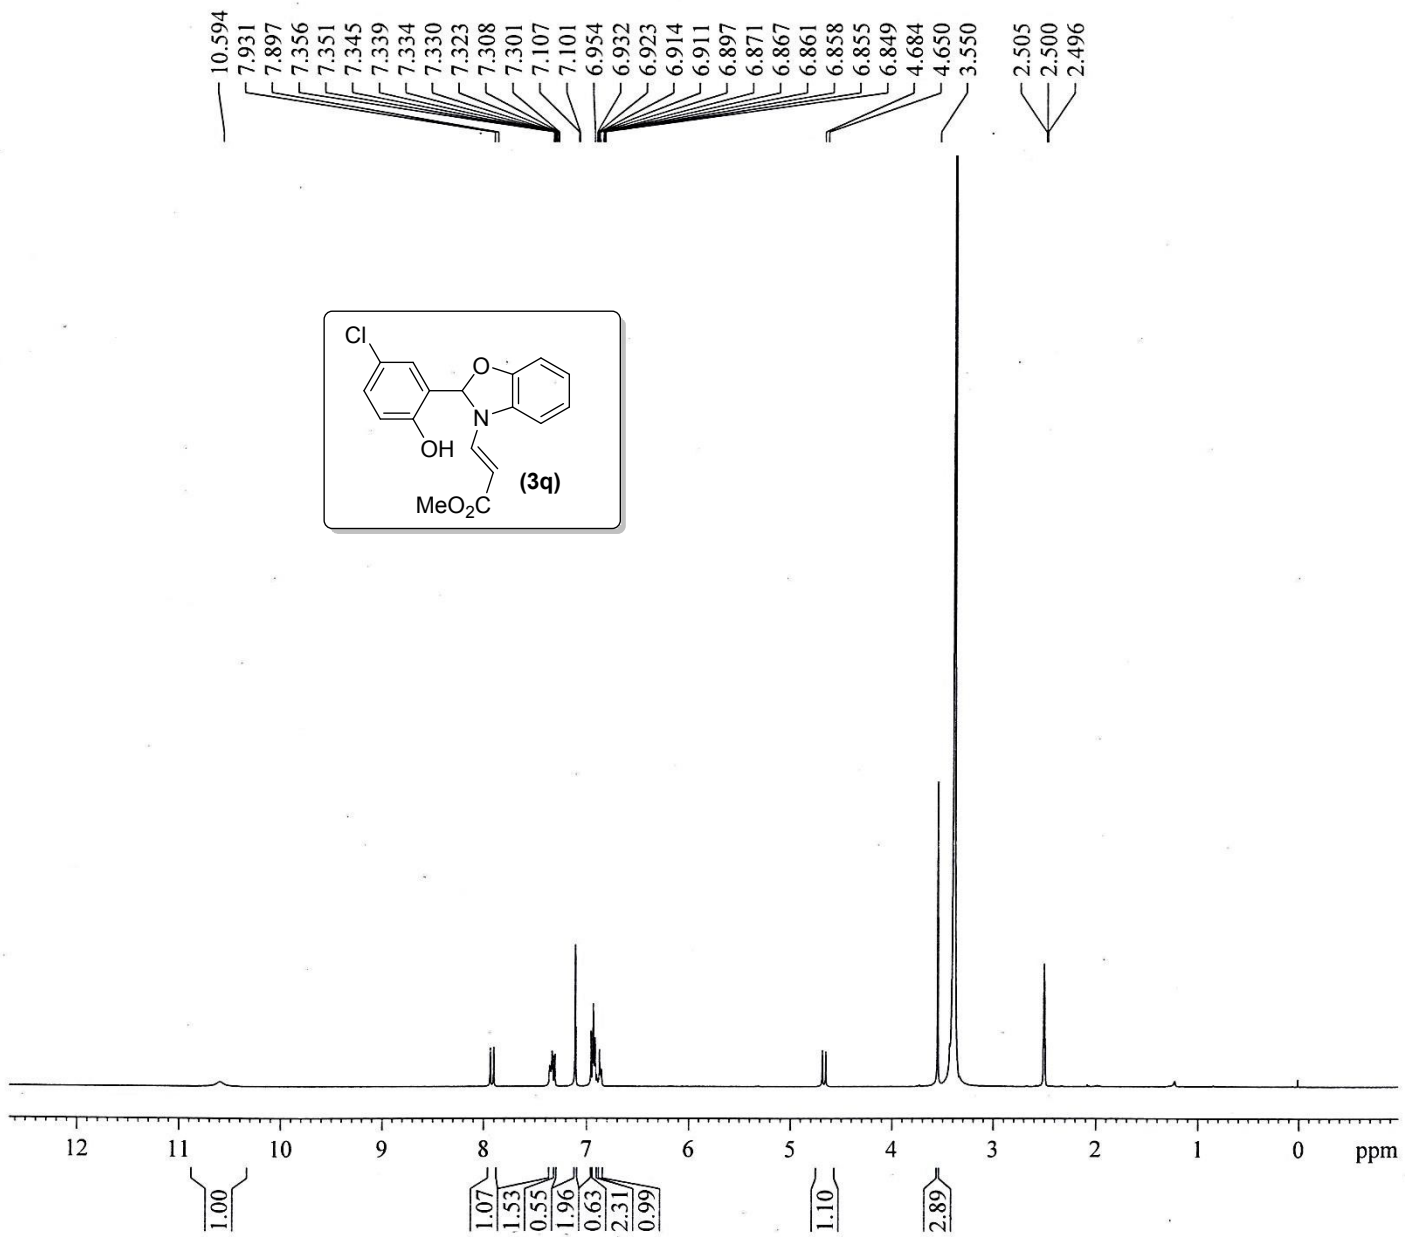

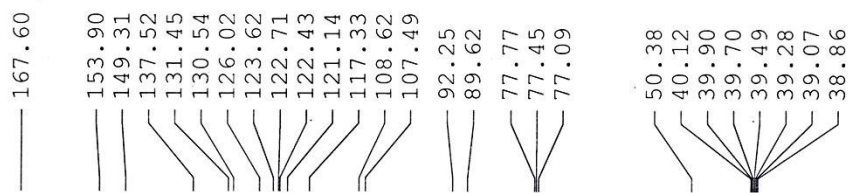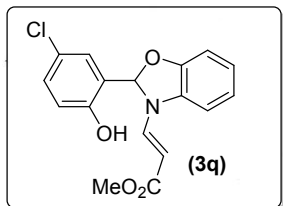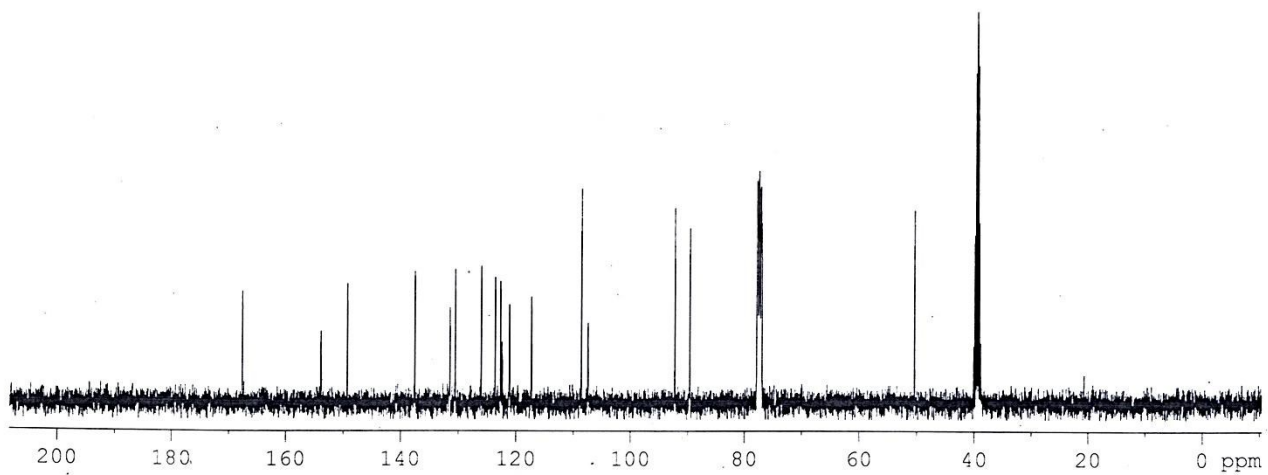

|               |          |             |                      |                 |        |                        |               |
|---------------|----------|-------------|----------------------|-----------------|--------|------------------------|---------------|
| Sample Name   | MM-166   | Position    |                      | Instrument Name | Q-TOF  | User Name              | QTOF-PU\admin |
| Inj Vol       | -1       | InjPosition |                      | SampleType      | Sample | IRM Calibration Status | Success       |
| Data Filename | MM-166.d | ACQ Method  | Pondicherry Universi |                 |        |                        |               |

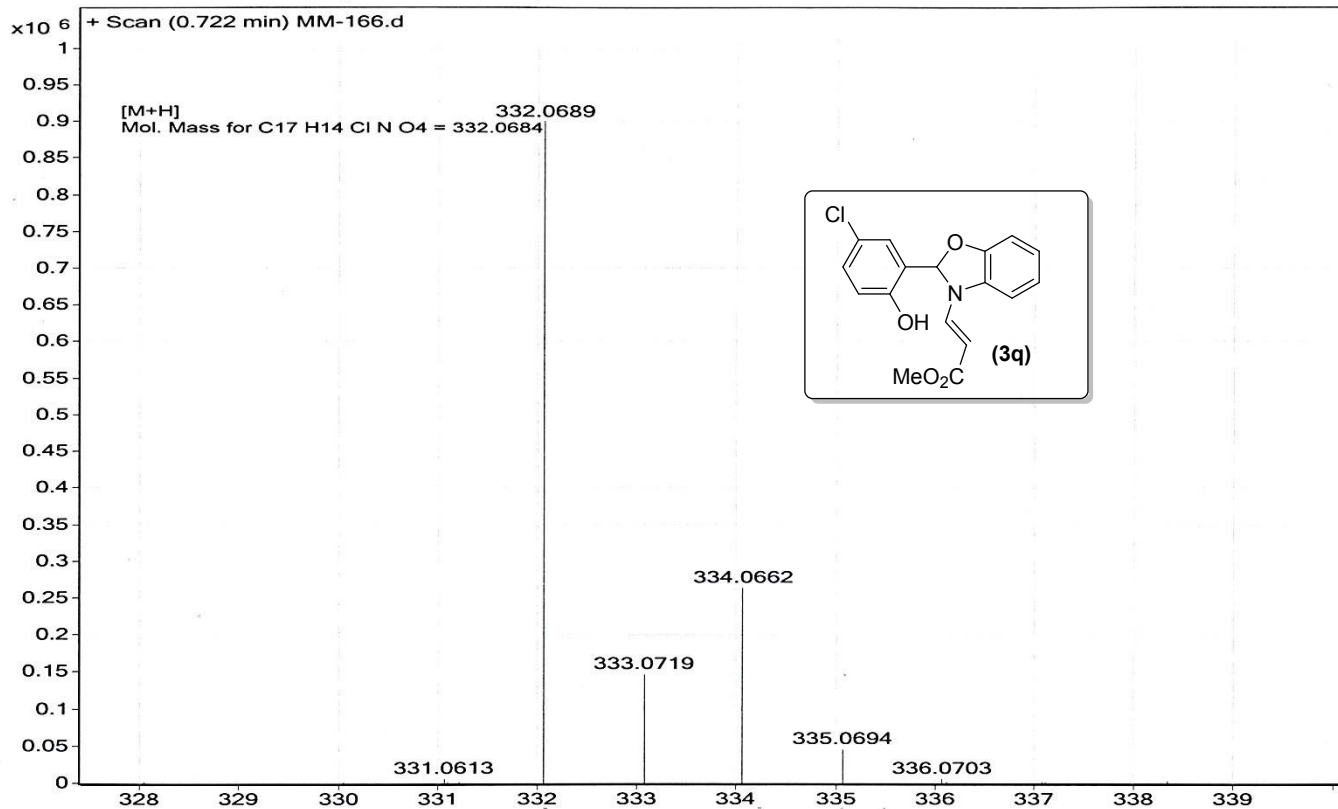

PROTON CDC13 {D:\MB} KOPAL 1

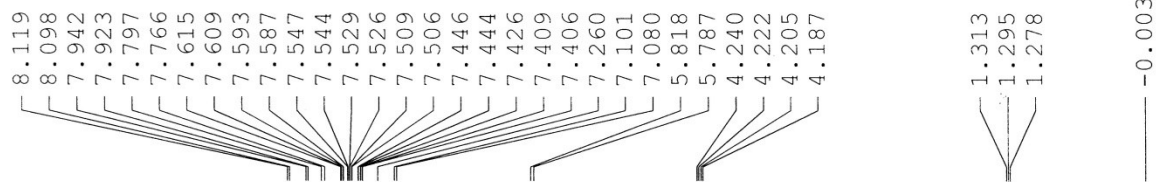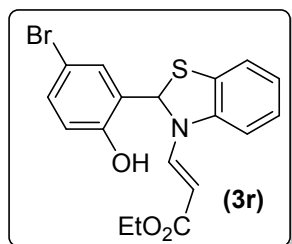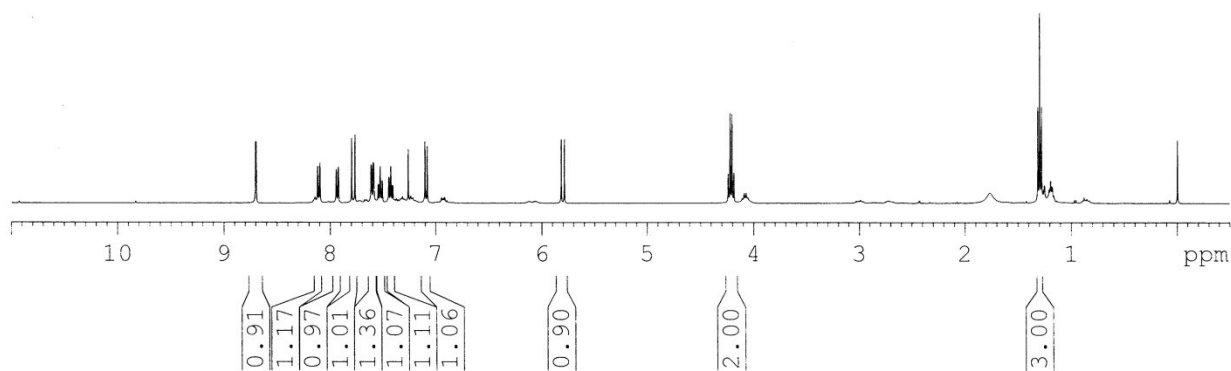



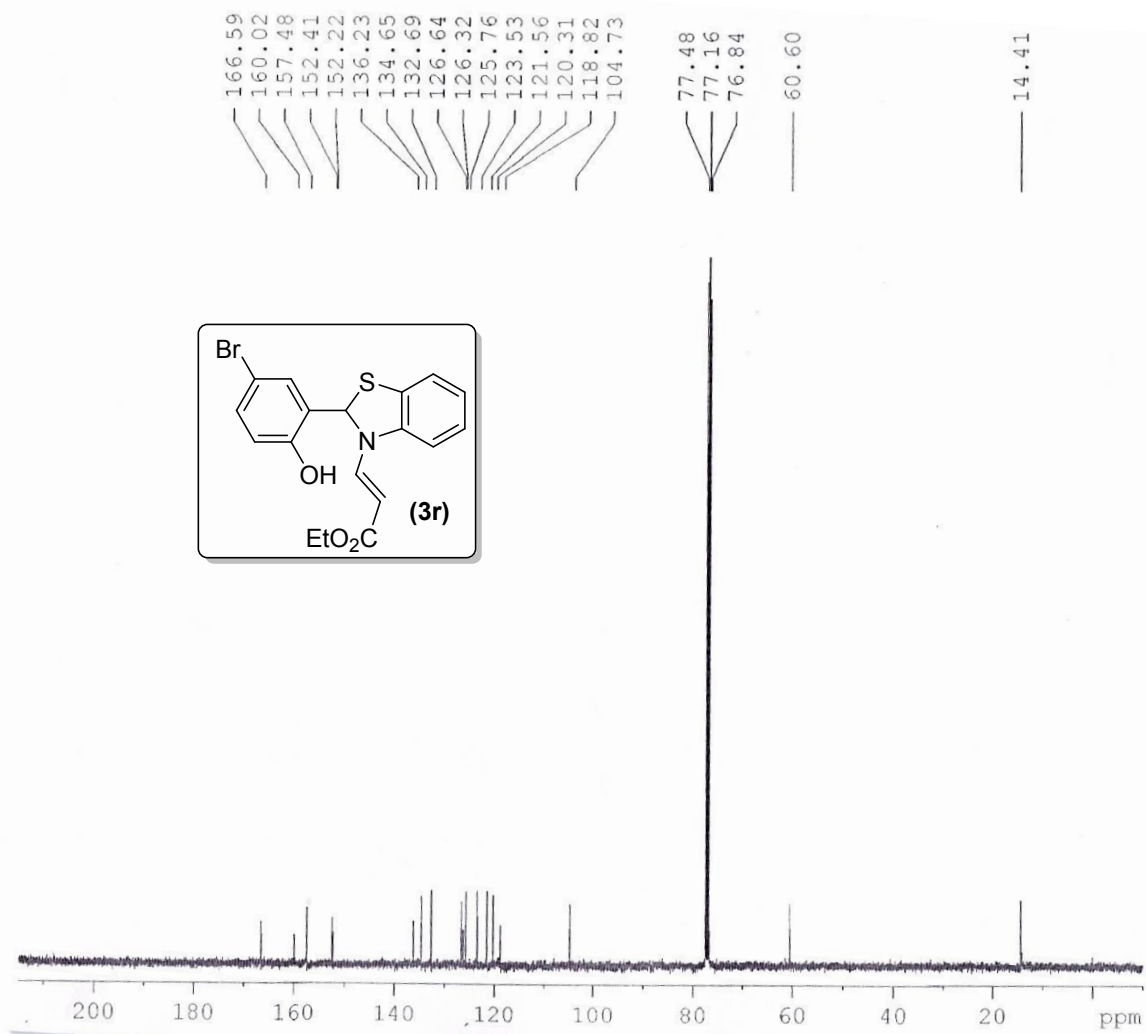

Sample Name MM-442      Position      Instrument Name Q-TOF      User Name      QTOF-PU/admin  
Inj Vol -1      InjPosition      SampleType      Sample      IRM Calibration Status      Success  
Data Filename MM-442.d      ACQ Method      Pondicherry Universi

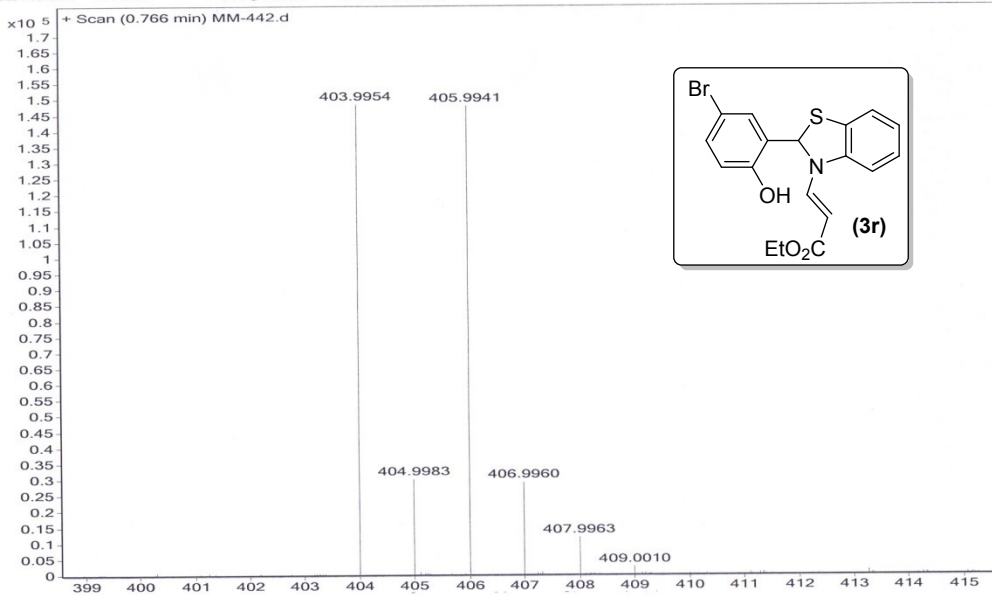

PROTON CDC13 {D:\MB} KOPAL 1

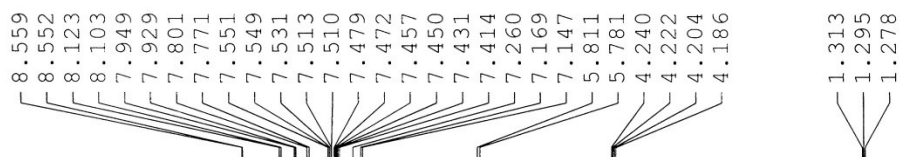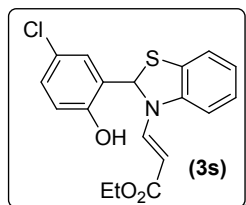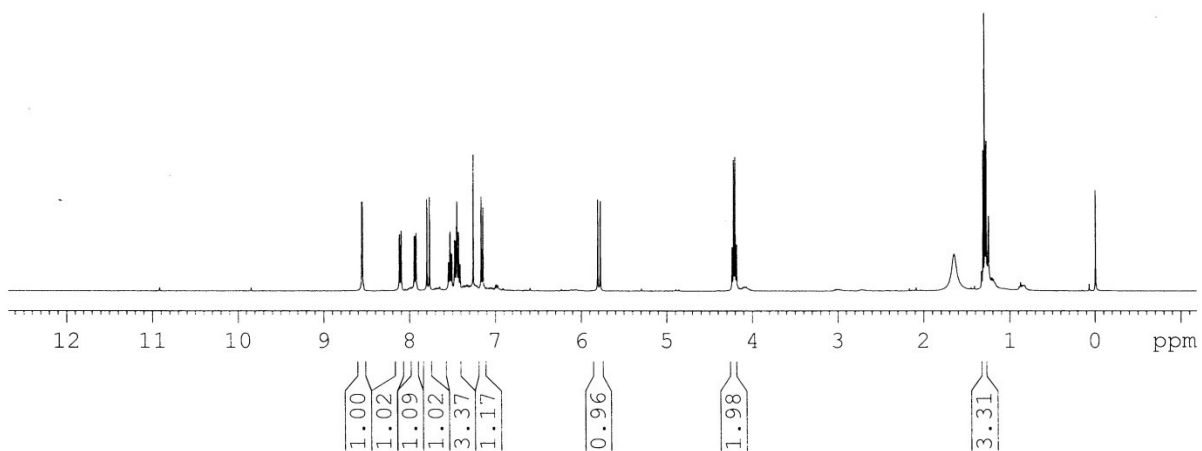

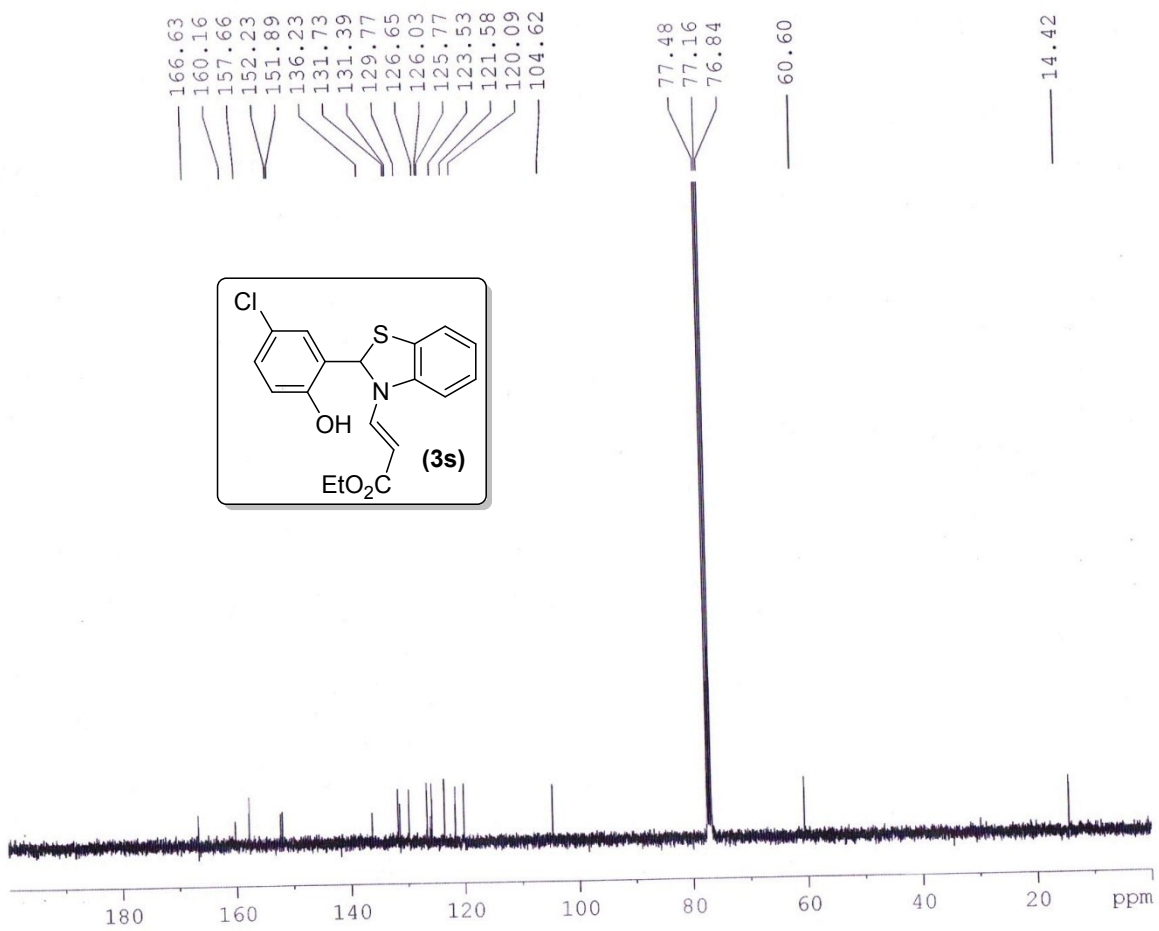

Sample Name MM-503      Position      Instrument Name Q-TOF      User Name      QTOF-PU\admin  
Inj Vol -1      InjPosition      SampleType      Sample      IRM Calibration Status      Success  
Data Filename MM-503.d      ACQ Method      Pondicherry Universi

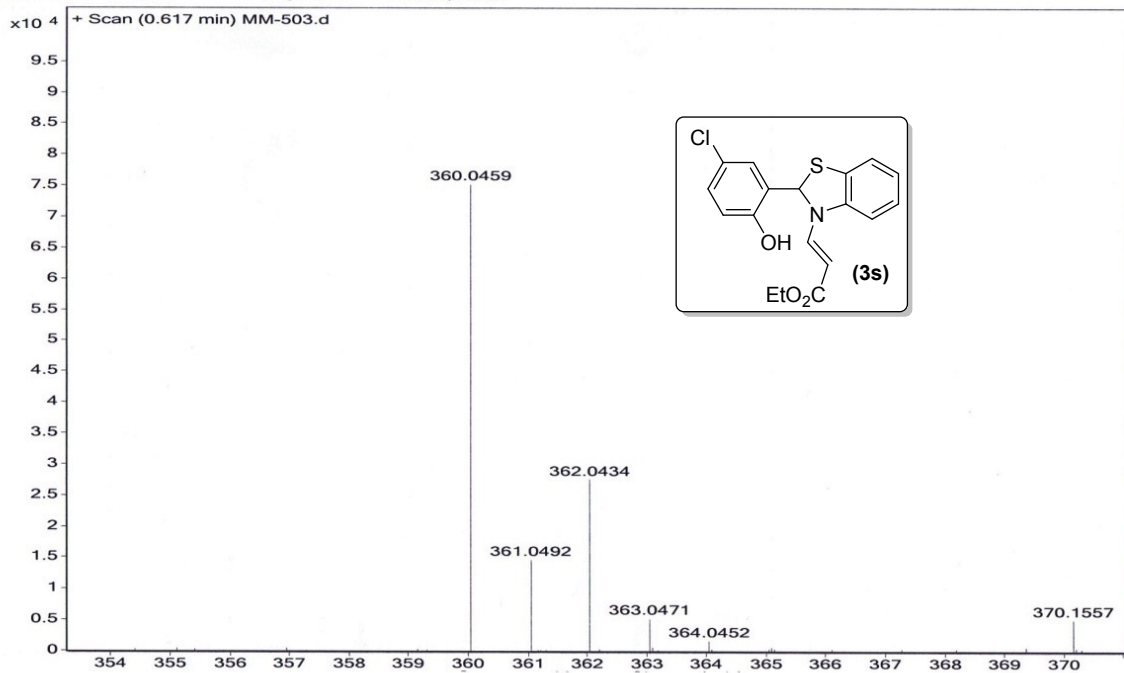

PROTON DMSO {D:\MB} KOPAL 1

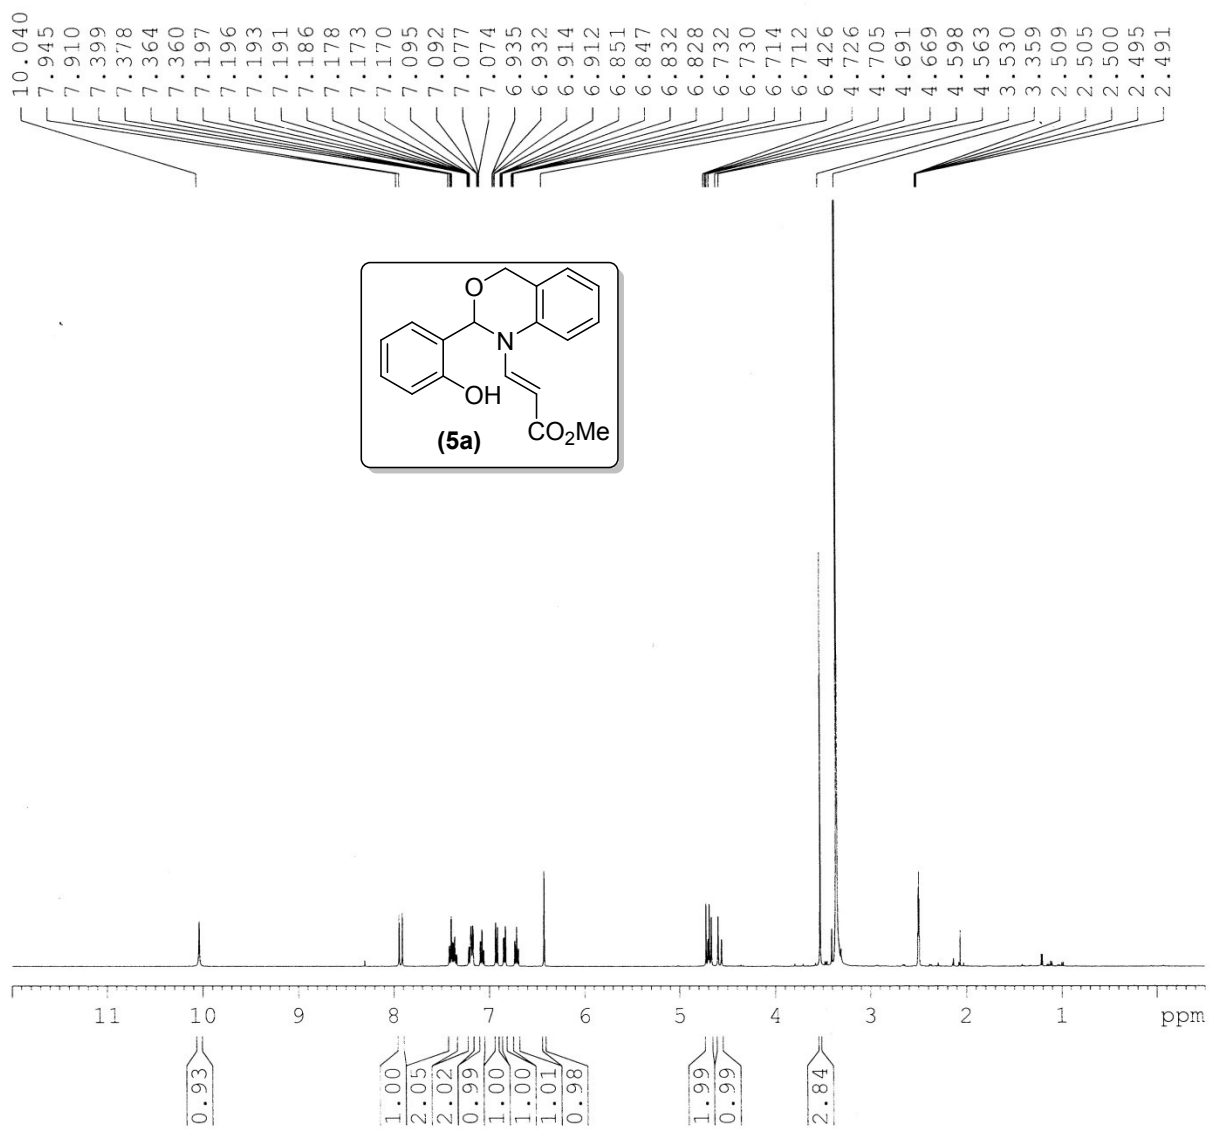

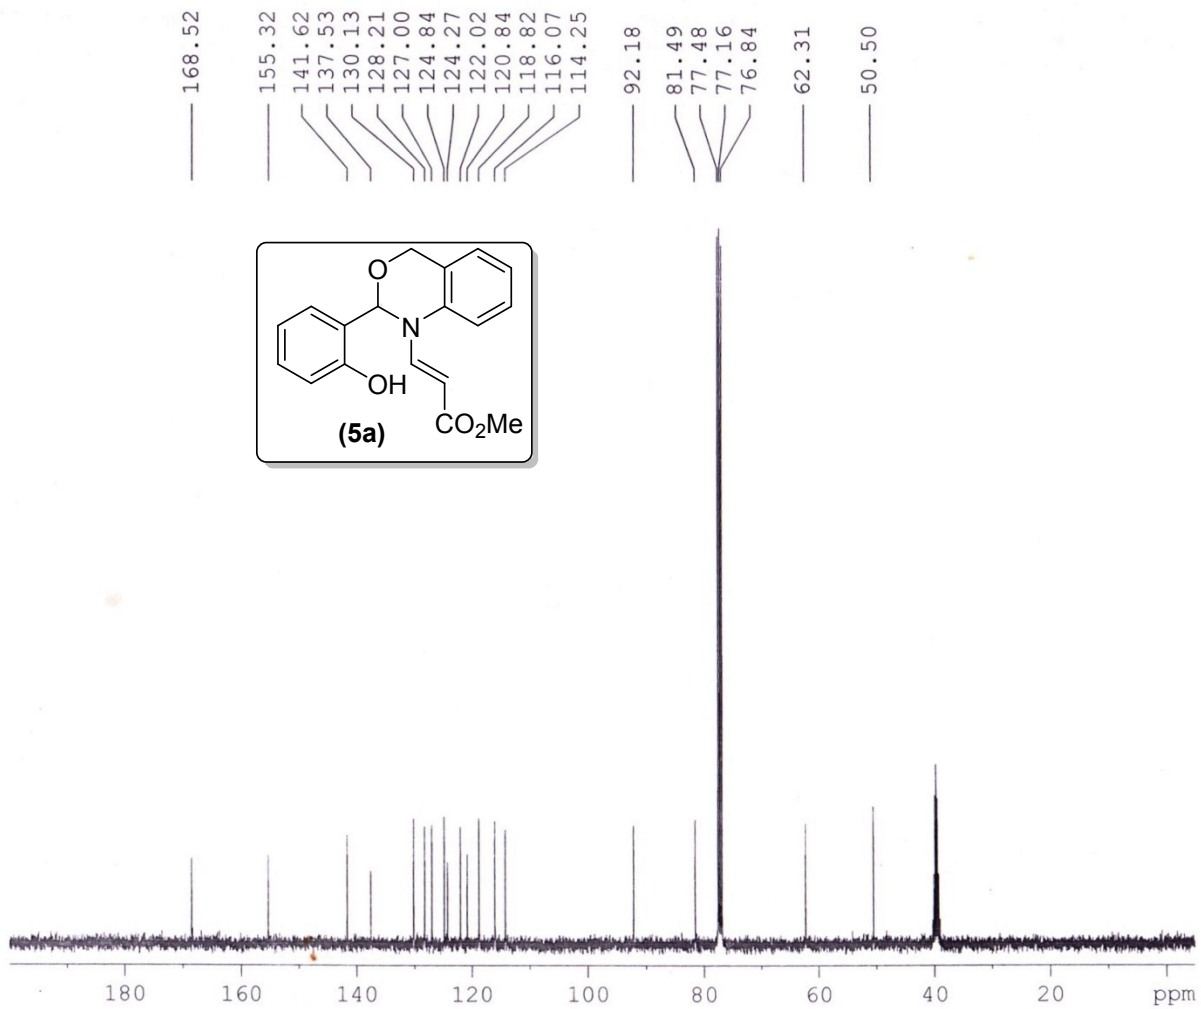

|               |         |             |                      |                 |        |                        |               |
|---------------|---------|-------------|----------------------|-----------------|--------|------------------------|---------------|
| Sample Name   | MM-39   | Position    |                      | Instrument Name | Q-TOF  | User Name              | QTOF-PU\admin |
| Inj Vol       | -1      | InjPosition |                      | SampleType      | Sample | IRM Calibration Status | Success       |
| Data Filename | MM-39.d | ACQ Method  | Pondicherry Universi |                 |        |                        |               |

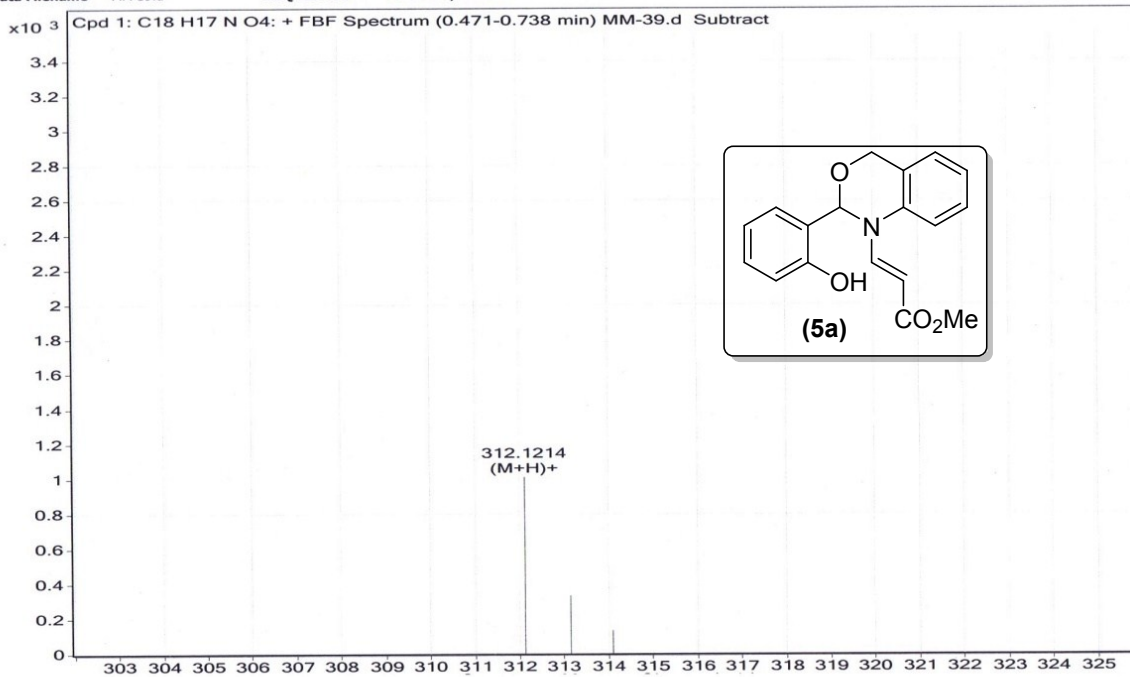



PROTON DMSO {D:\MB} KOPAL 1

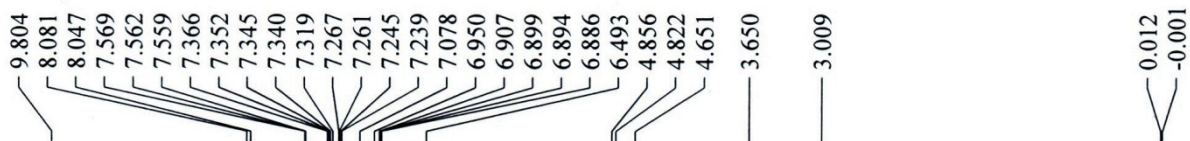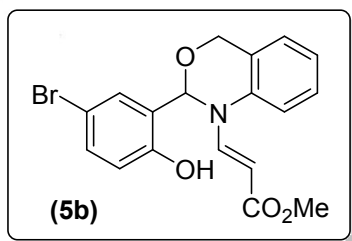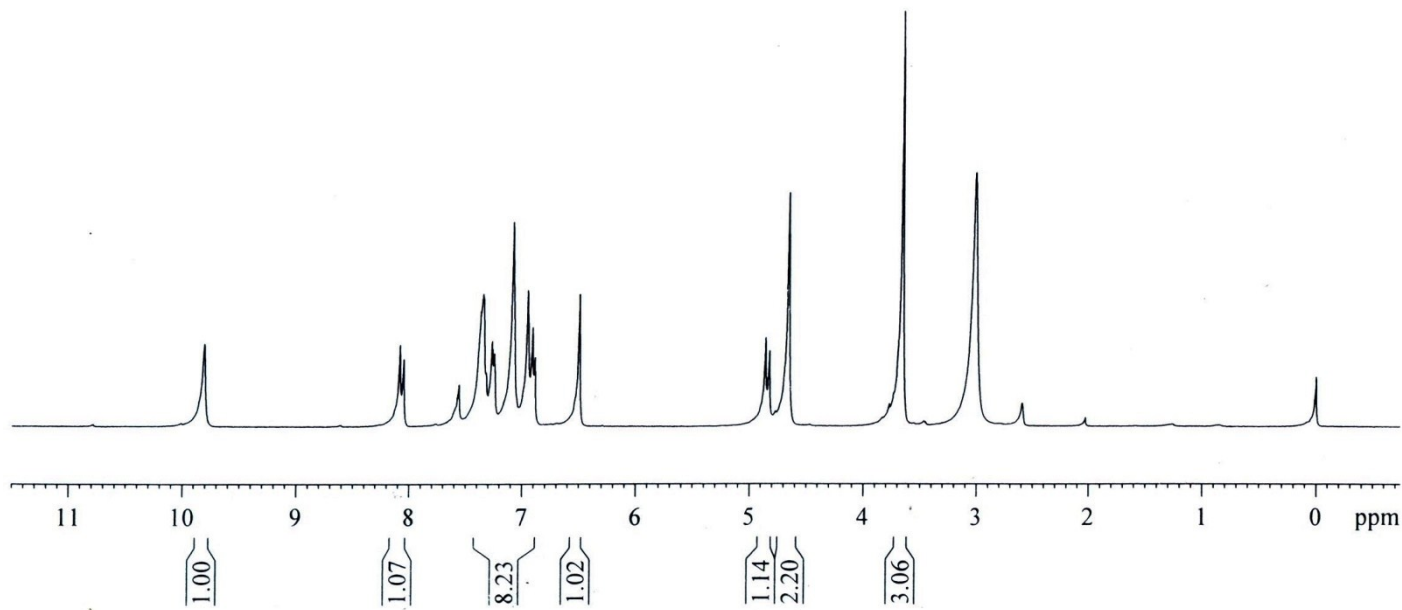

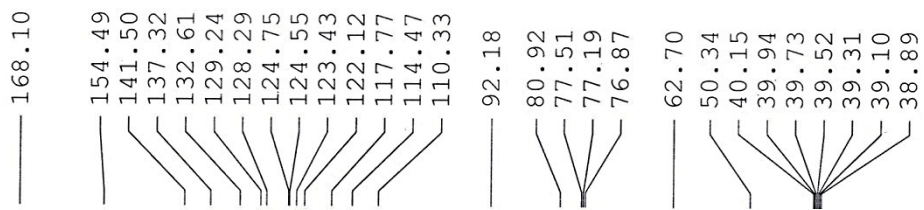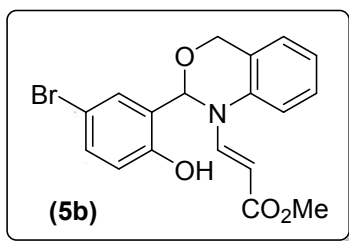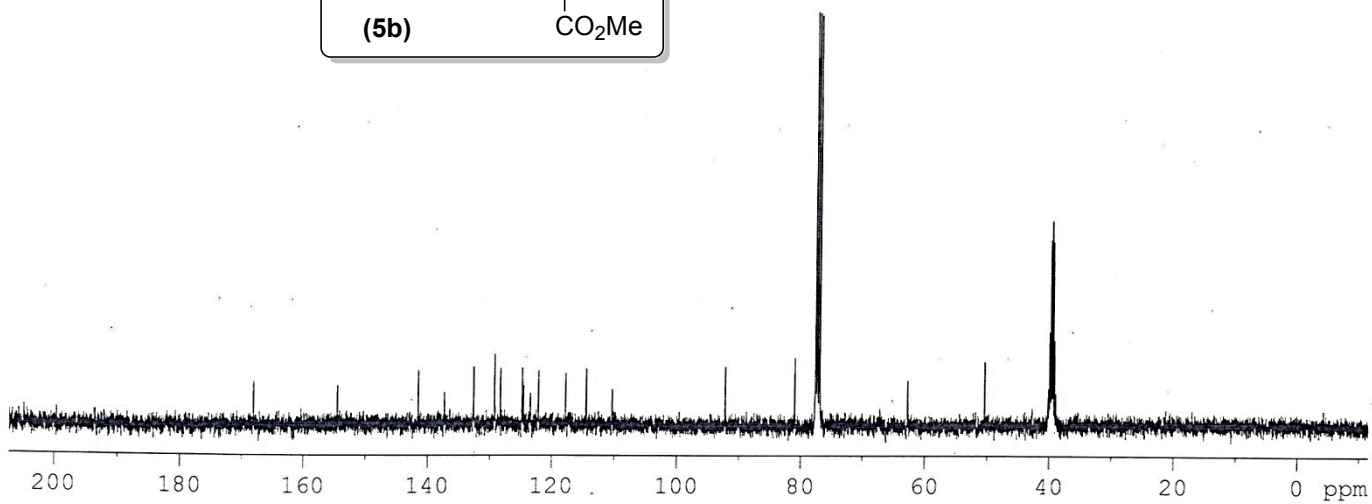

|               |          |             |                      |                 |        |                        |               |
|---------------|----------|-------------|----------------------|-----------------|--------|------------------------|---------------|
| Sample Name   | MM-118   | Position    |                      | Instrument Name | Q-TOF  | User Name              | QTOF-PU\admin |
| Inj Vol       | -1       | InjPosition |                      | SampleType      | Sample | IRM Calibration Status | Success       |
| Data Filename | MM-118.d | ACQ Method  | Pondicherry Universi |                 |        |                        |               |

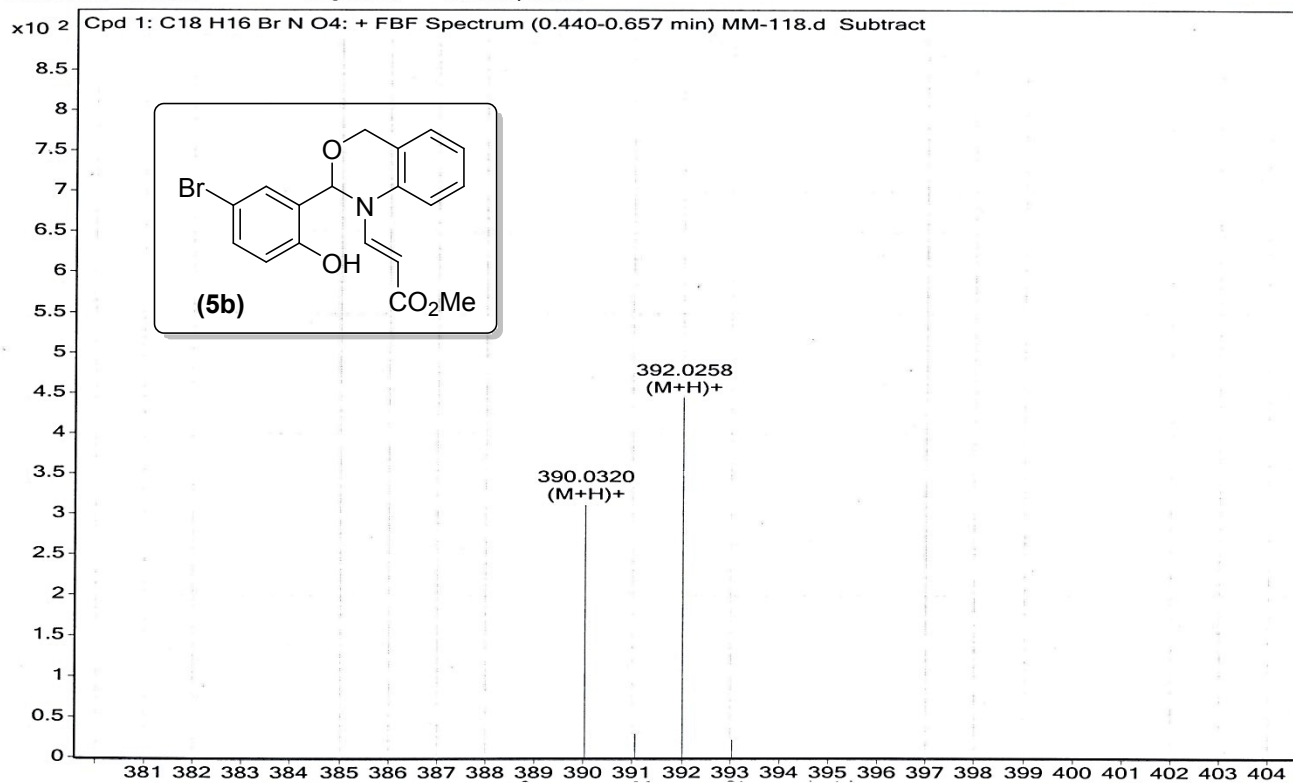

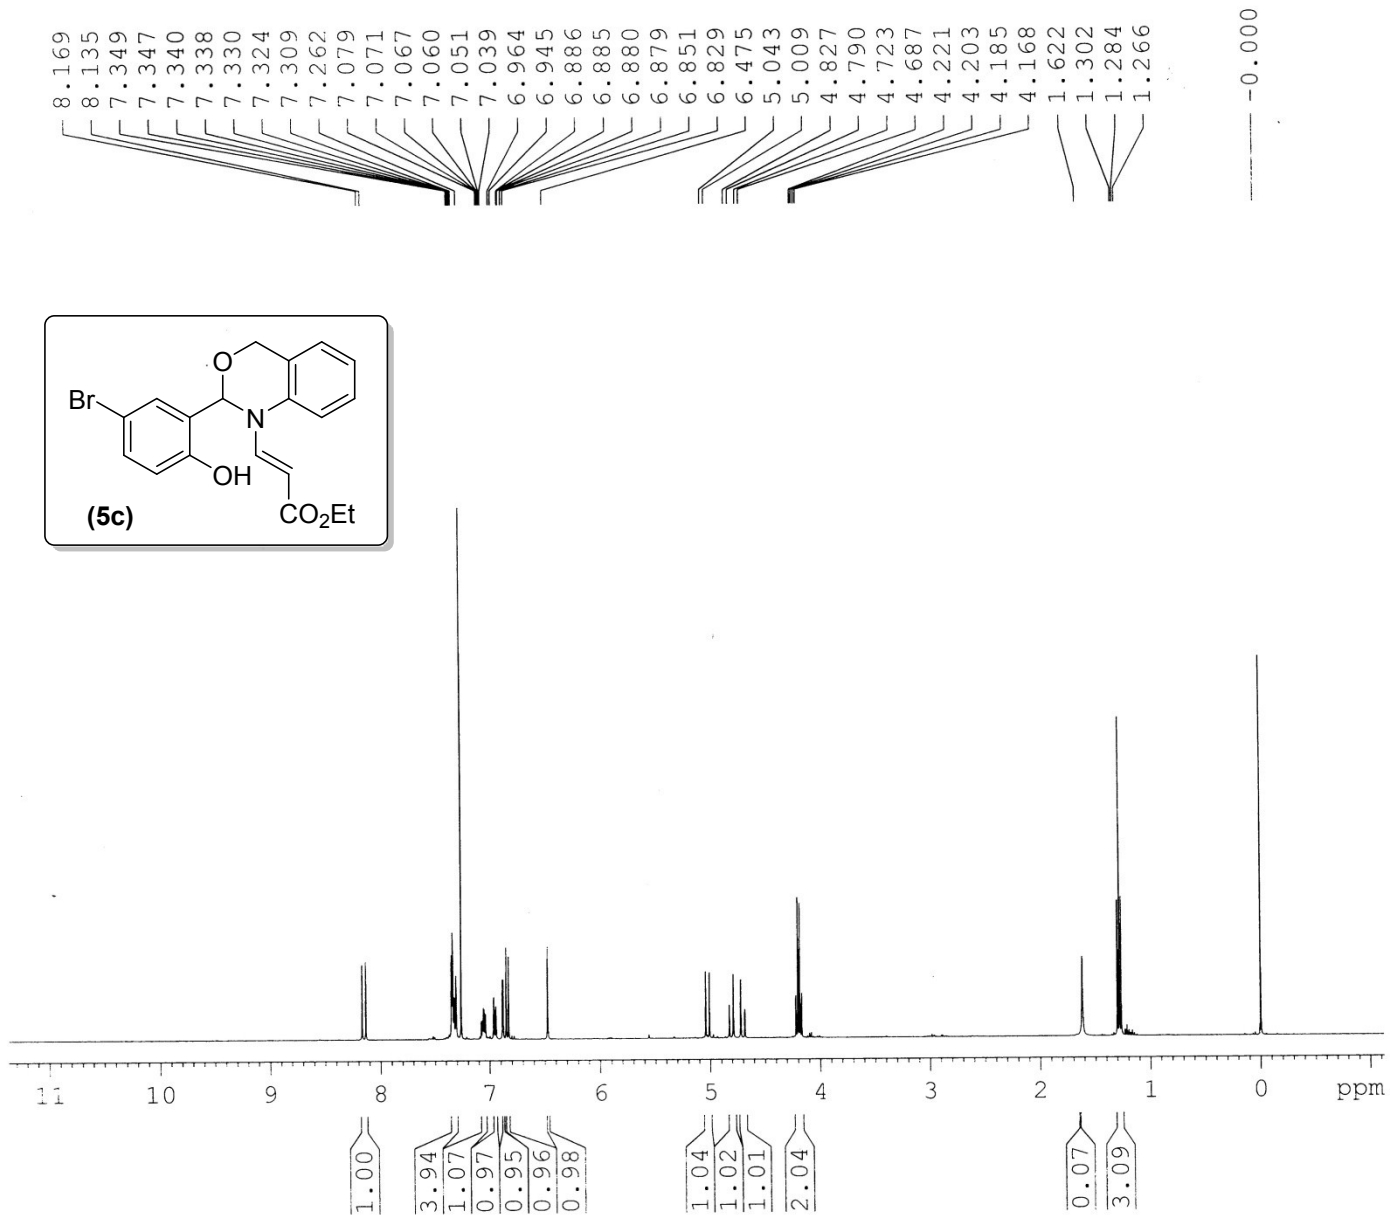

— 167.79  
 — 154.55  
 — 141.45  
 — 137.35  
 — 132.65  
 — 129.33  
 — 128.29  
 — 124.77  
 — 124.44  
 — 123.44  
 — 122.11  
 — 117.84  
 — 114.50  
 — 110.41  
 — 92.66  
 — 80.98  
 — 77.48  
 — 77.16  
 — 76.84  
 — 62.64  
 — 58.97  
 — 39.96  
 — 39.75  
 — 39.54  
 — 39.33  
 — 39.12  
 — 13.99

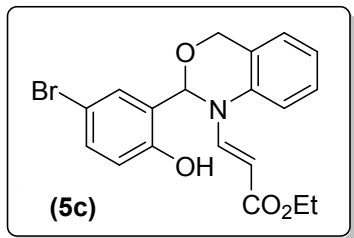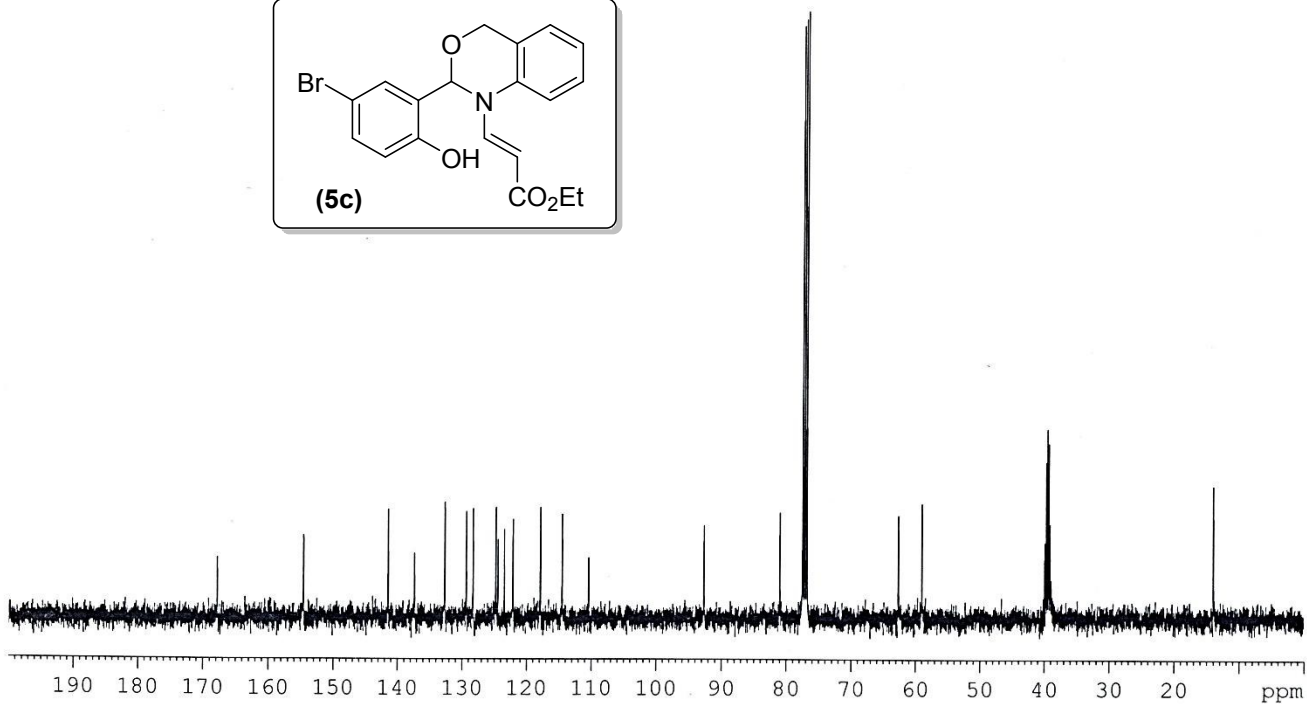

|               |          |             |                      |                 |        |                        |               |
|---------------|----------|-------------|----------------------|-----------------|--------|------------------------|---------------|
| Sample Name   | MM-105   | Position    |                      | Instrument Name | Q-TOF  | User Name              | QTOF-PU\admin |
| Inj Vol       | -1       | InjPosition |                      | SampleType      | Sample | IRM Calibration Status | Success       |
| Data Filename | MM-105.d | ACQ Method  | Pondicherry Universi |                 |        | Acquired Time          |               |

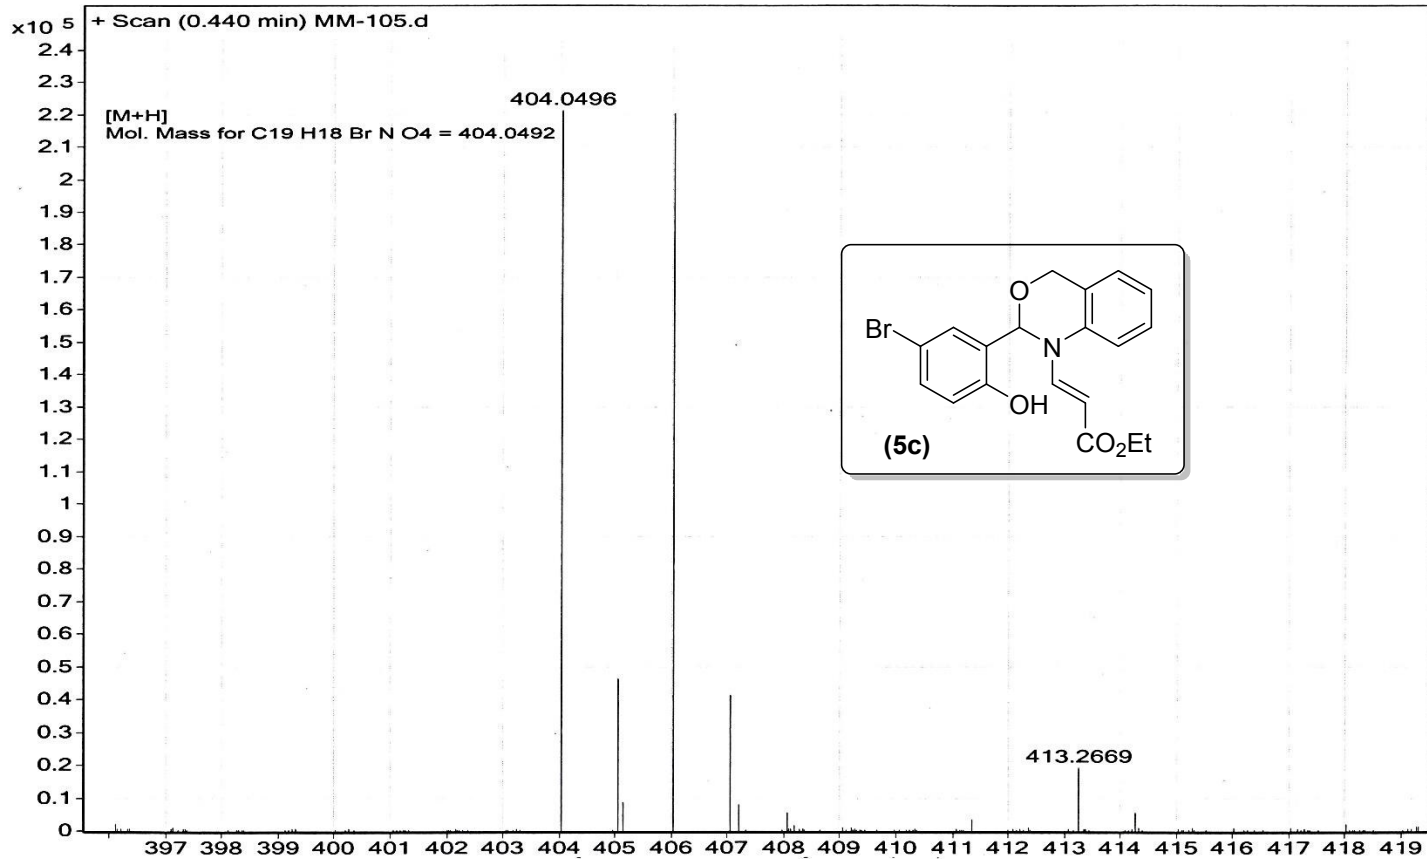

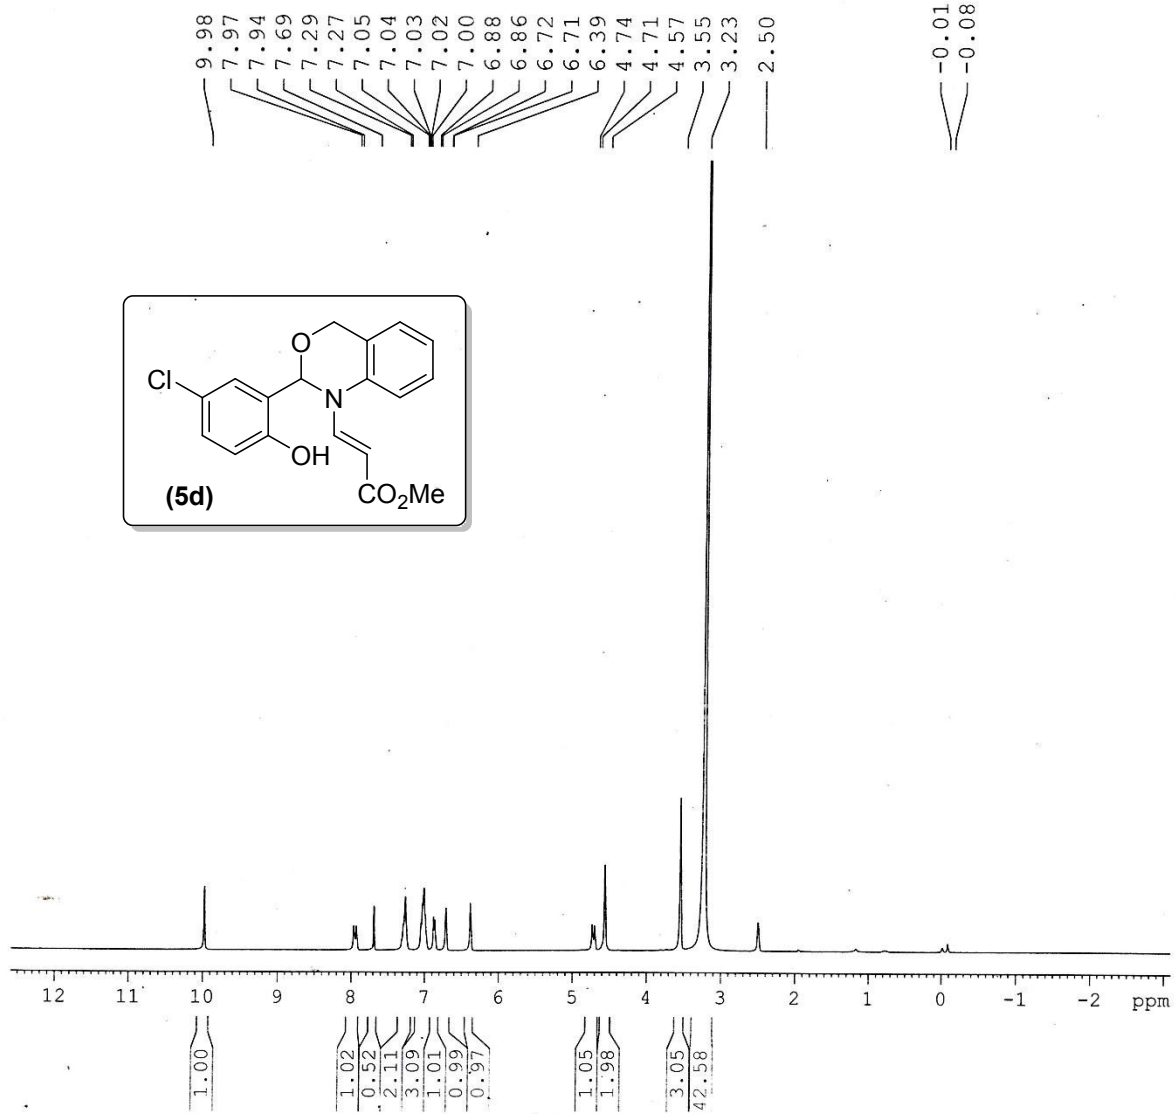

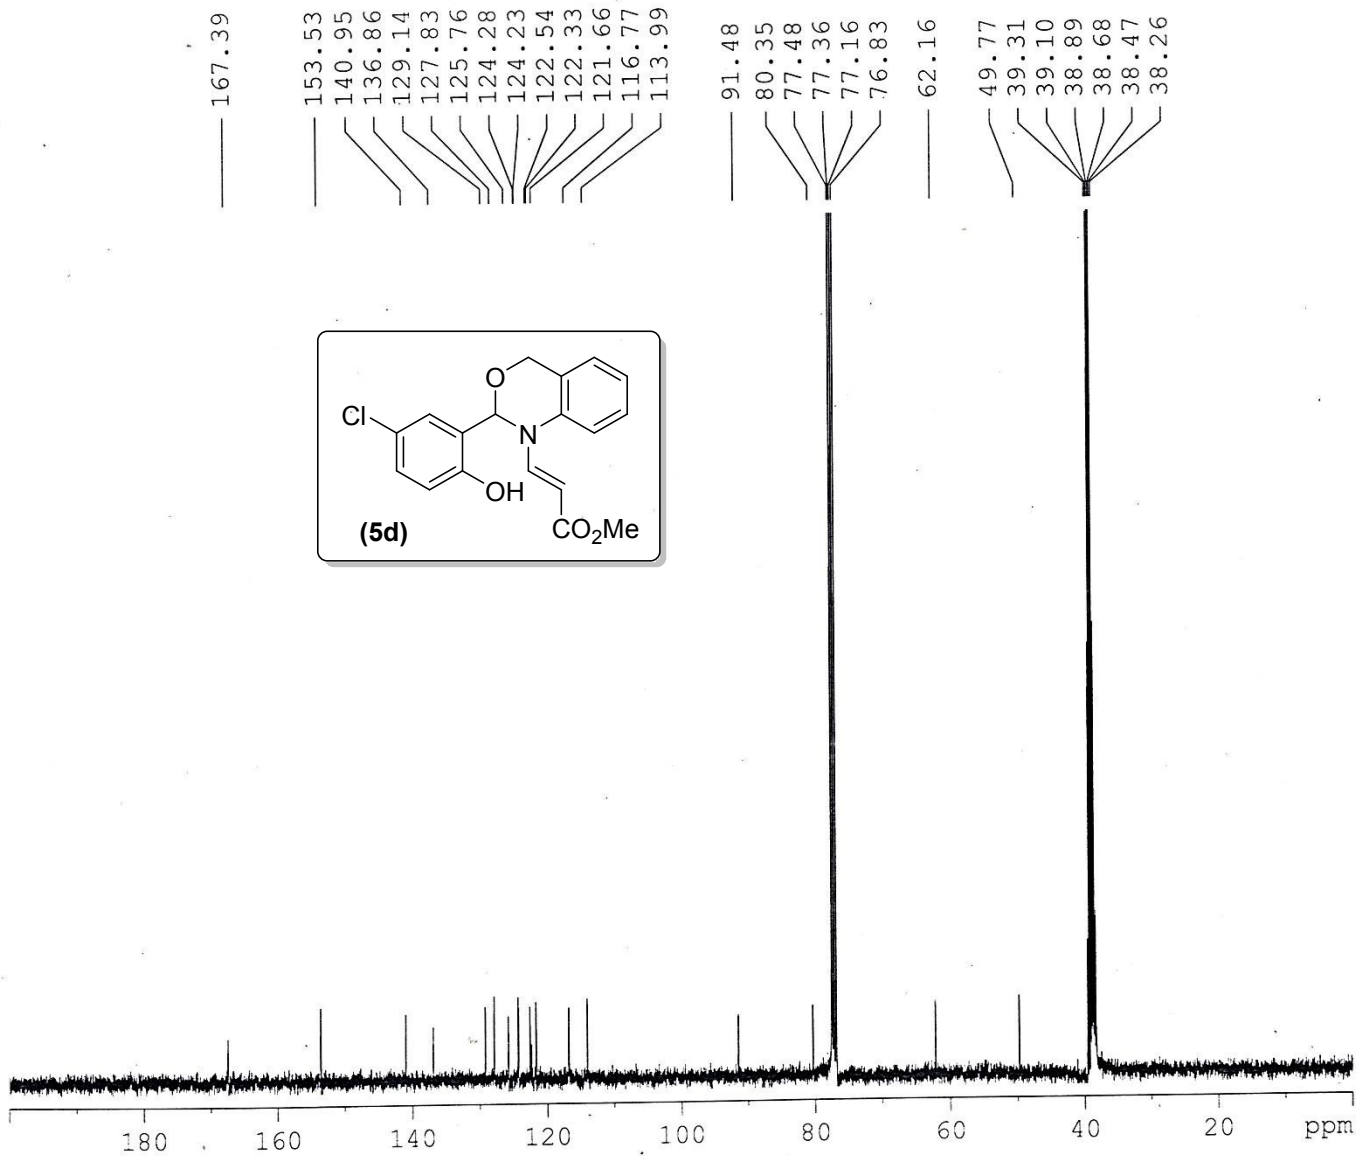



Sample Name MM-174  
Inj Vol -1  
Data Filename MM-174N.d

Position  
InjPosition  
ACQ Method Pondicherry Universi

Instrument Name Q-TOF  
SampleType Sample

User Name  
IRM Calibration Status

QTOF-PUadmin  
Success

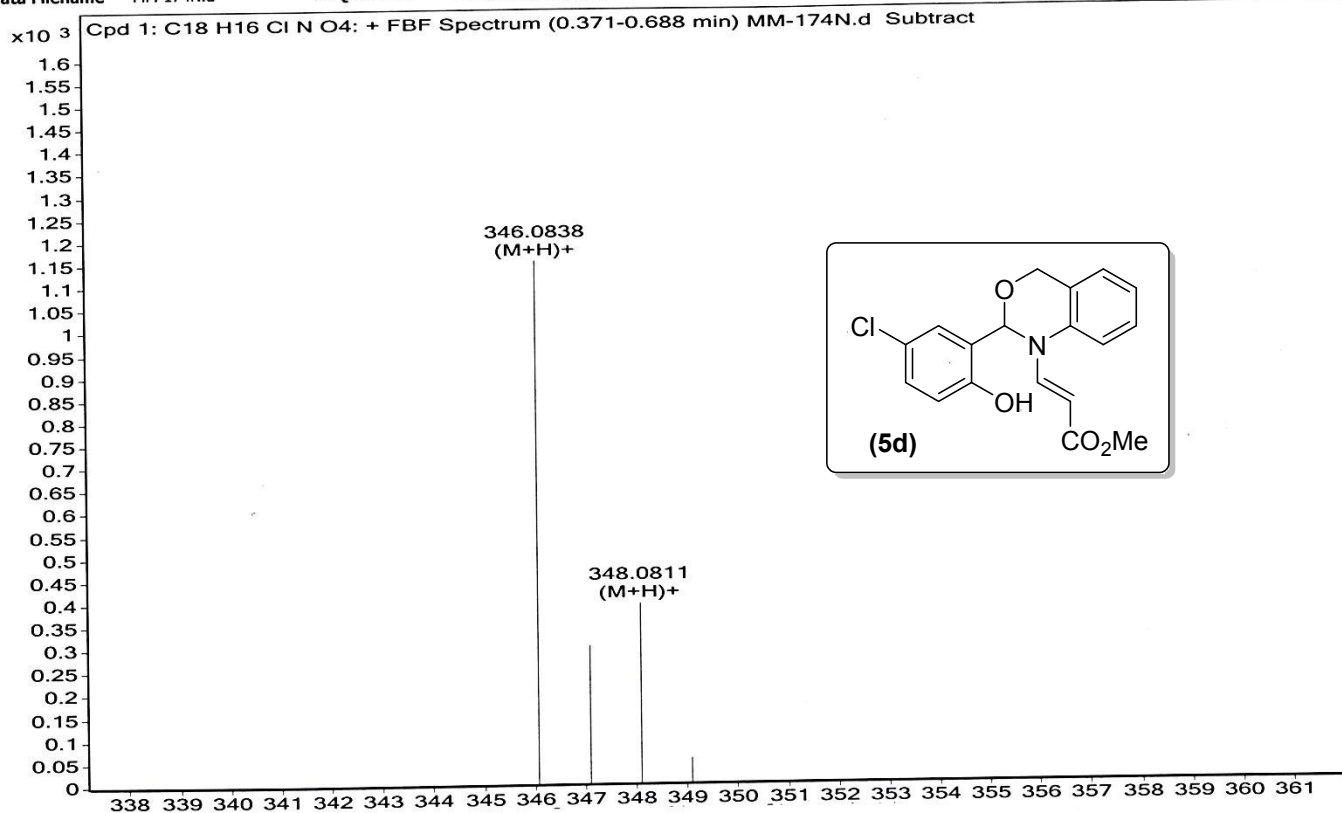

8.158  
8.124  
7.260  
7.029  
7.020  
7.016  
7.010  
6.845  
6.842  
6.825  
6.822  
6.707  
6.687  
6.667  
6.591  
6.553  
6.551  
6.533  
6.531  
6.169  
4.912  
4.878  
4.660  
4.152  
4.135  
4.117  
4.100  
3.665  
2.168  
1.636  
1.486  
1.469  
1.451  
-0.002

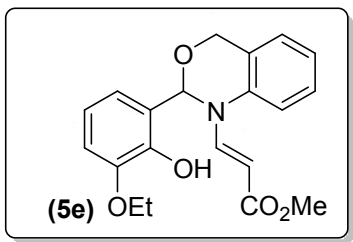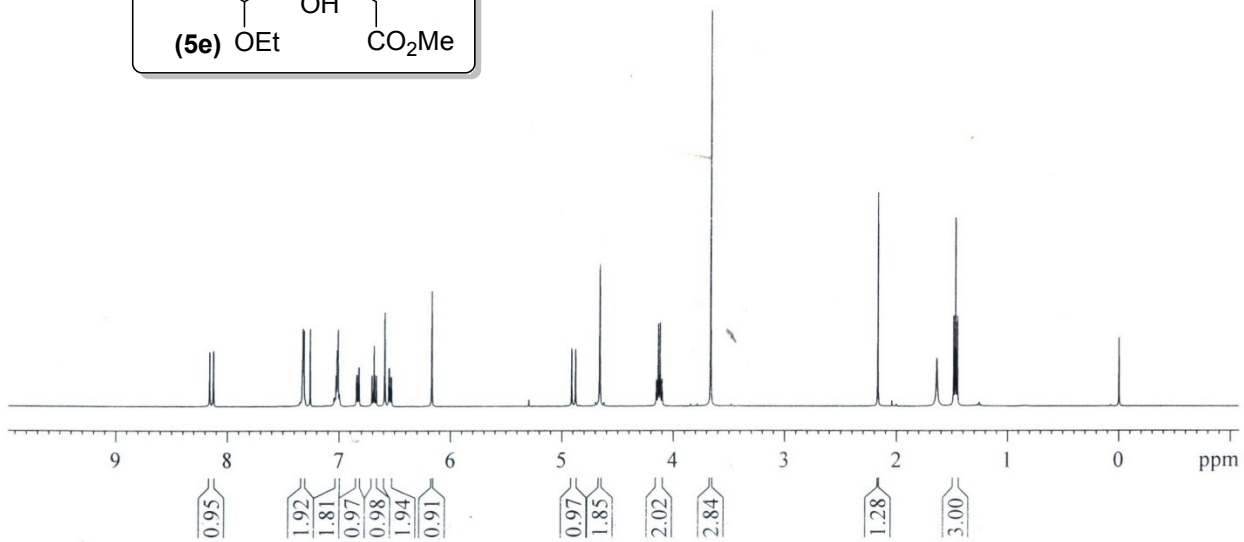

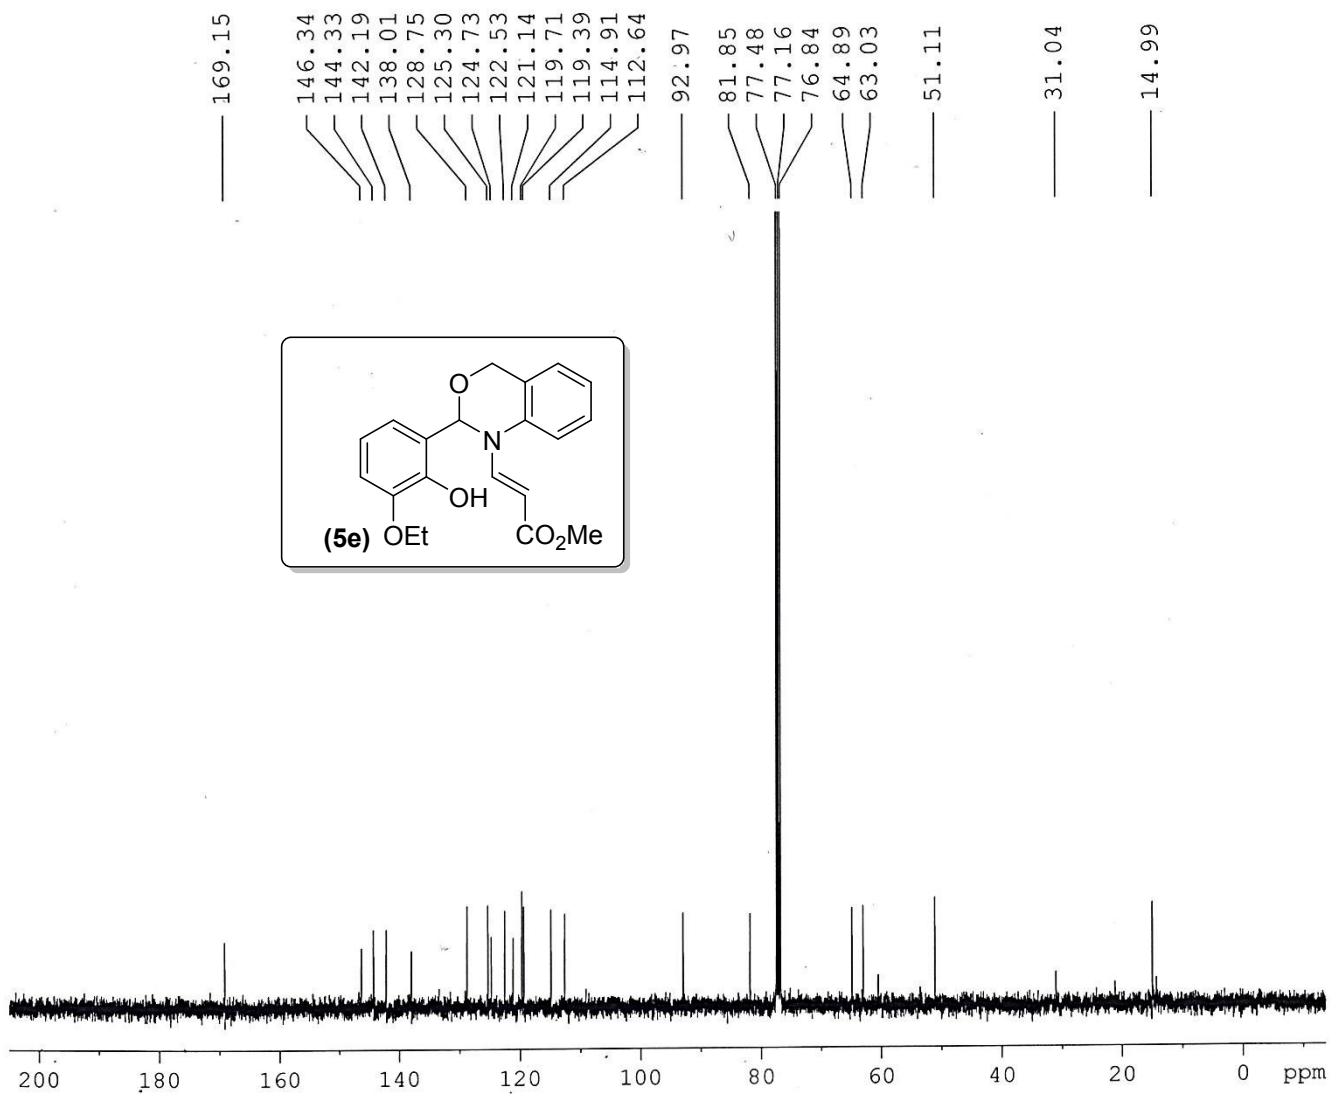

Sample Name MM-174      Position      Instrument Name Q-TOF      User Name QTOF-PU\admin  
Inj Vol -1      InjPosition      SampleType Sample      IRM Calibration Status Success  
Data Filename MM-174.d      ACQ Method Pondicherry Universi

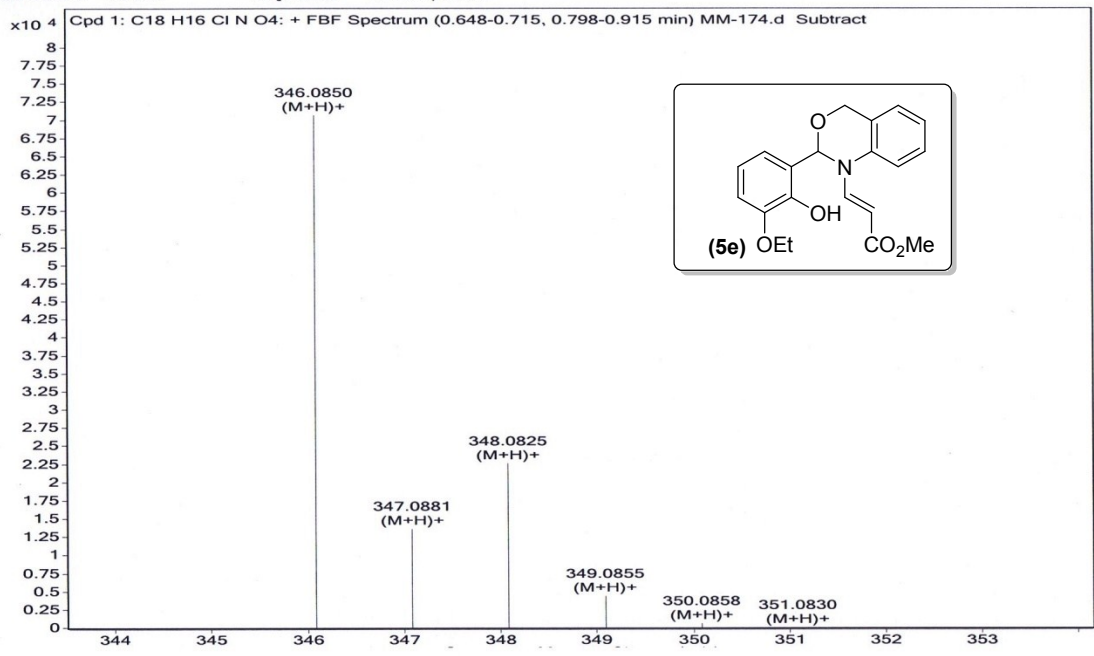

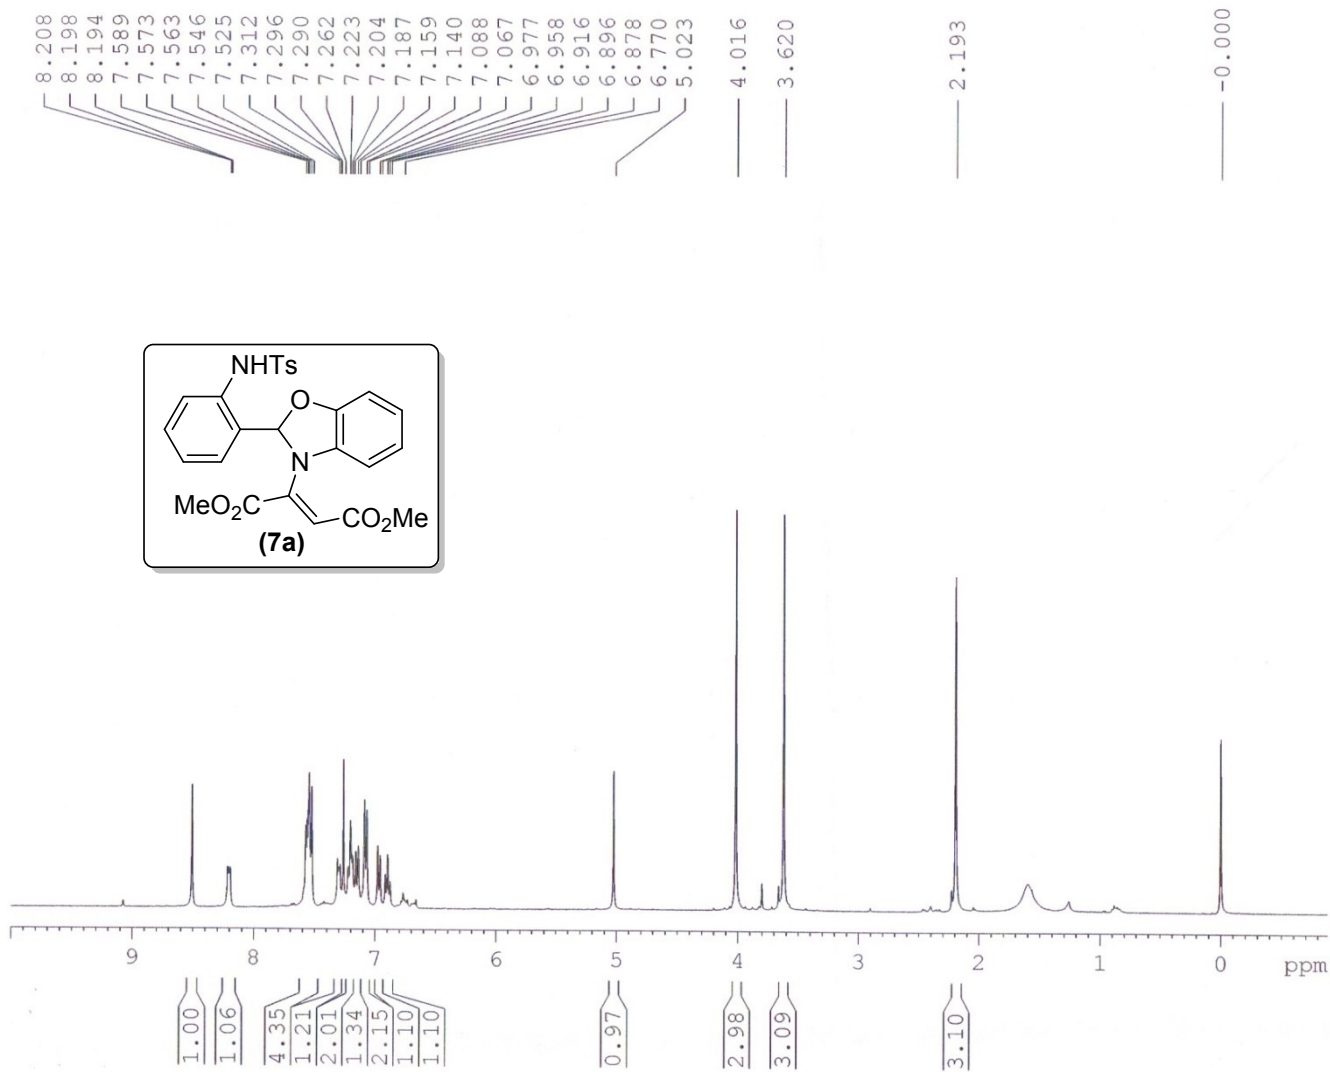

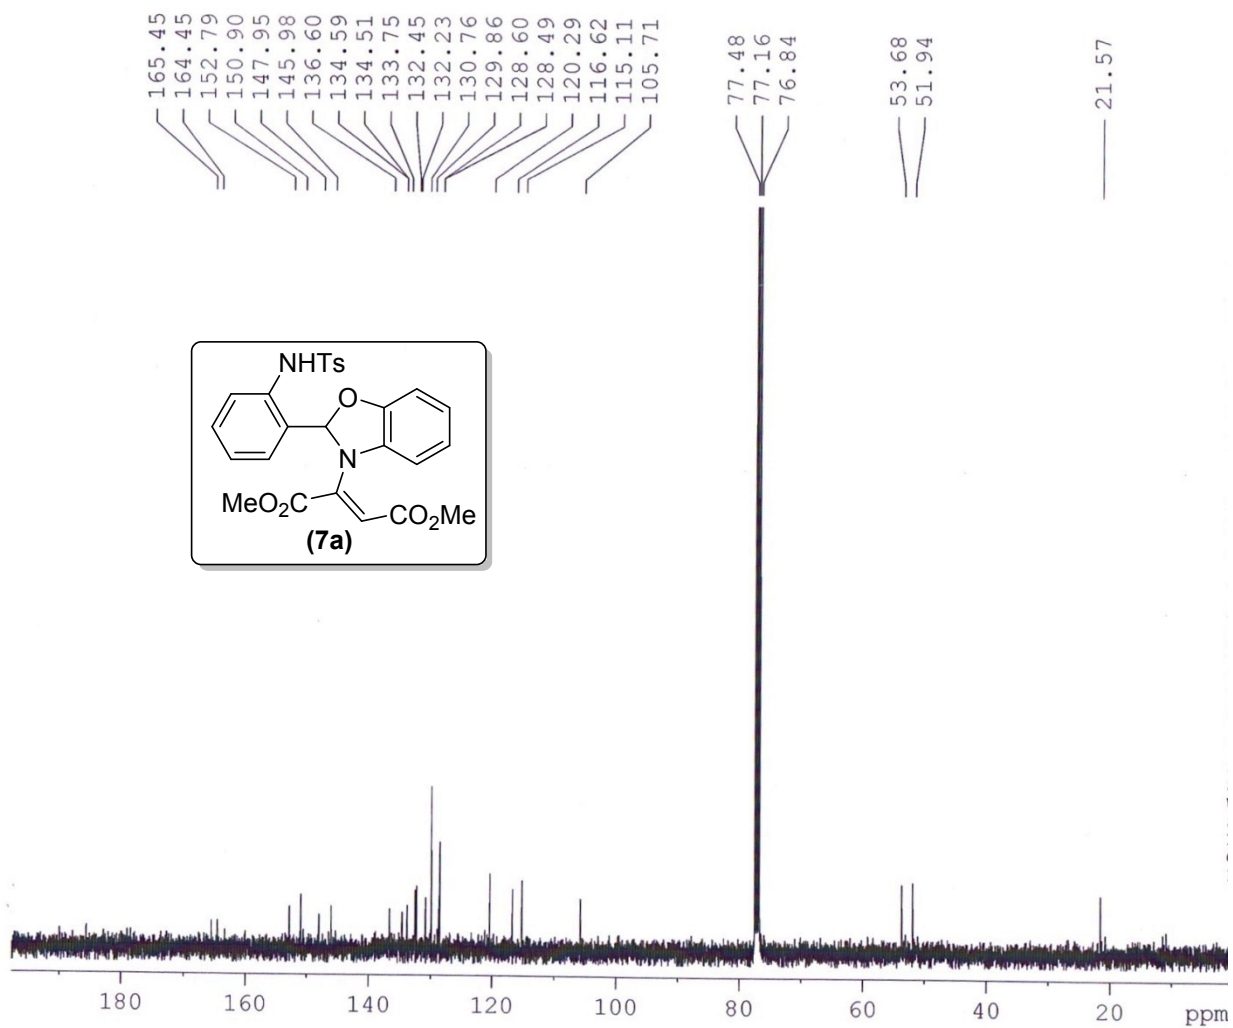

sample Name MM-447      Position      Instrument Name Q-TOF      User Name      QTOF-PU\admin  
Inj Vol -1      InjPosition      SampleType Sample      IRM Calibration Status      Success  
Data Filename MM-447.d      ACQ Method Pondicherry Universi      Comment

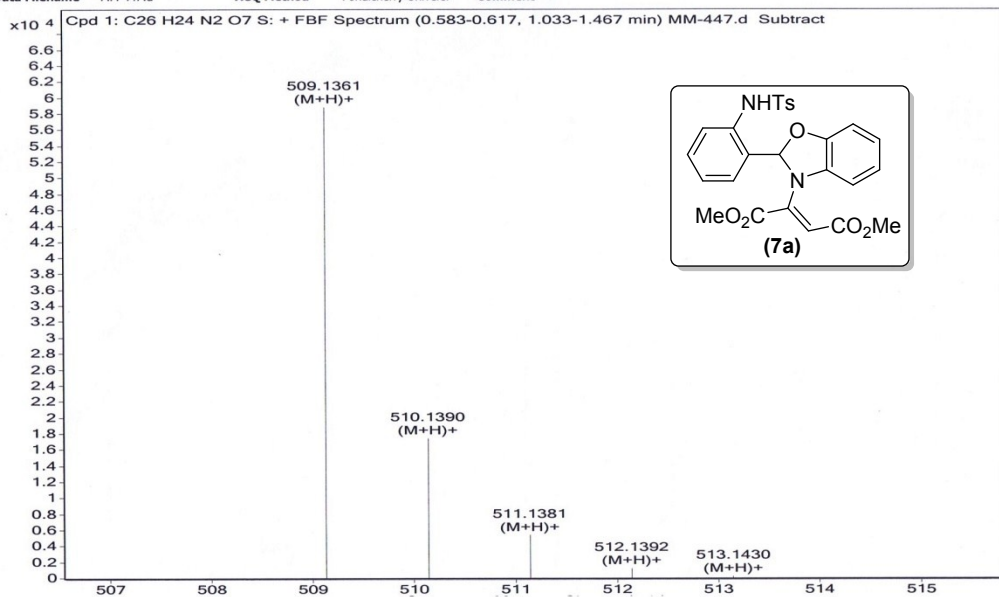

PROTON CDC13 {D:\MB} KOPAL 1

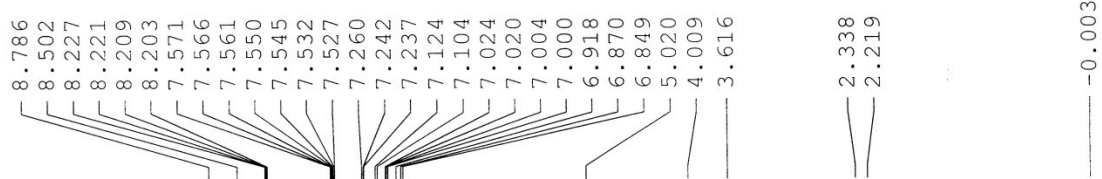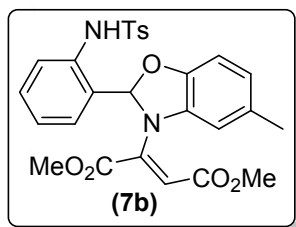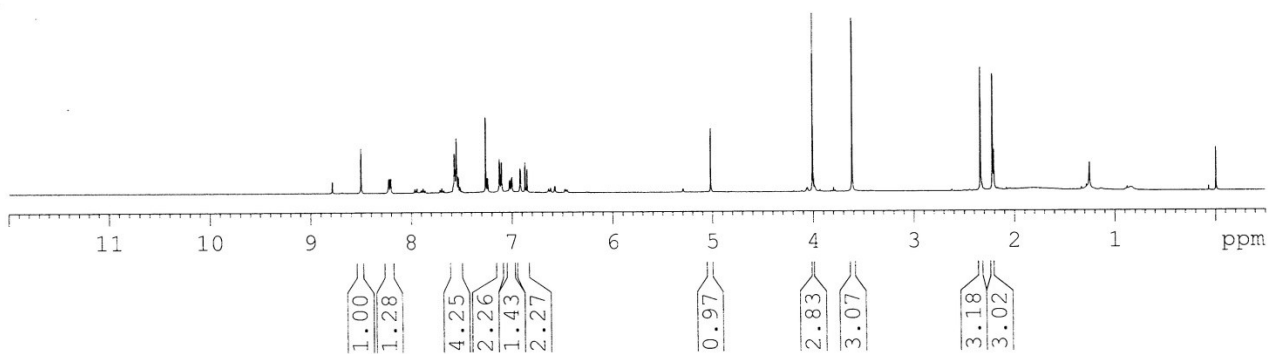



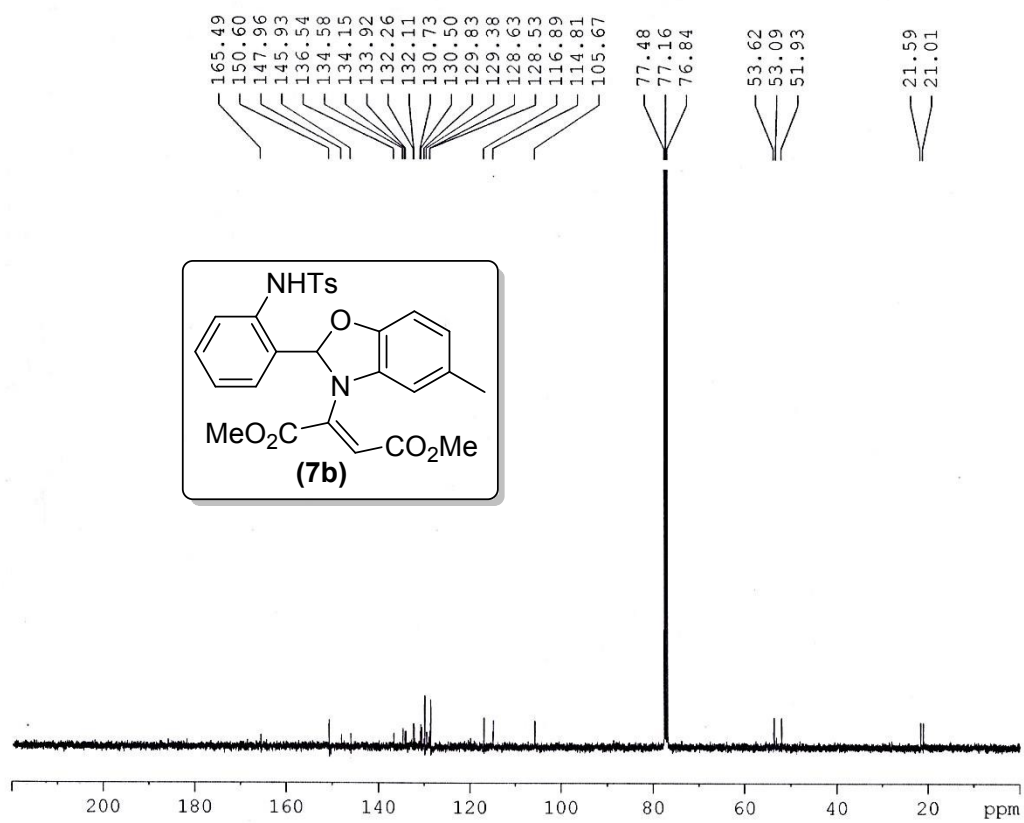

Sample Name MM-505      Position      Instrument Name Q-TOF      User Name QTOF-PU\admin  
Inj Vol -1      InjPosition      SampleType      Sample      IRM Calibration Status      Success  
Data Filename MM-505.d      ACQ Method      Pondicherry Universi

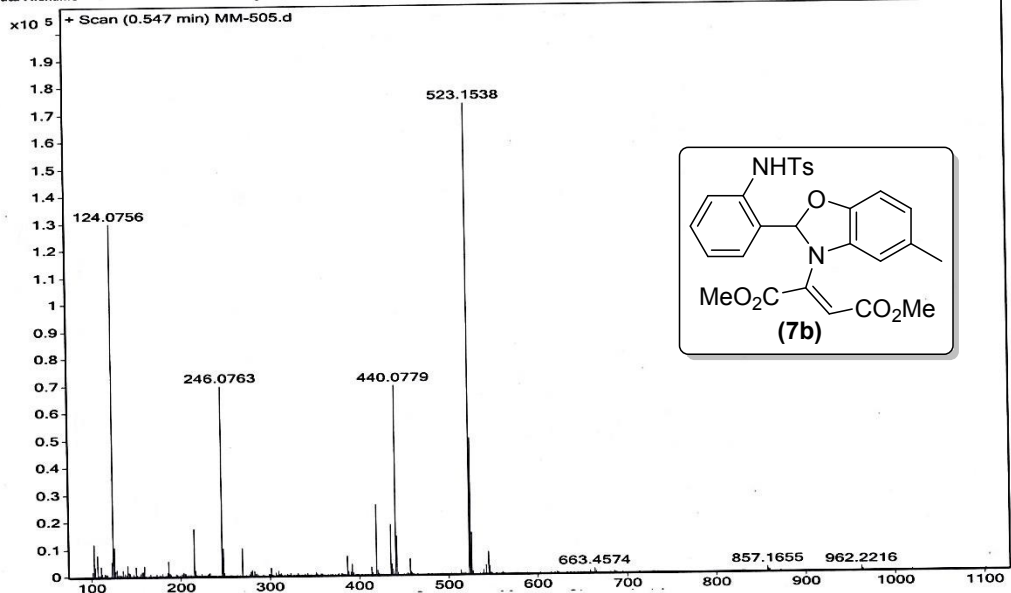

Supplement: c8ra01478g1.pdf [file c8ra01478g1.pdf]
